# Supplementary material for: Copper(i) catalyzed diastereoselective multicomponent synthesis of spiroindolo-pyrrolidines/-imidazolidines/-triazolidines from diazoamides via azomethine ylides
Source: Royal Society of Chemistry journal article supplement (doi:10.1039/c5ob02322j), 2016-01-01
Supplement: c5ob02322j1.pdf [file c5ob02322j1.pdf]

## Supporting Information

# Copper(I) catalyzed diastereoselective multicomponent synthesis of spiroindolo-pyrrolidines/-imidazolidines/-triazolidines from diazoamides via azomethine ylides

Sengodagounder Muthusamy,\* Singaravelan Ganesh Kumar

School of Chemistry, Bharathidasan University, Tiruchirappalli – 620 024, India

| Contents                                                                                                | Page no. |
|---------------------------------------------------------------------------------------------------------|----------|
| Characterization of Compounds <b>5e-i</b> , <b>7f-l</b> , <b>9f-j</b>                                   | S2-S13   |
| <sup>1</sup> H, <sup>13</sup> C, DEPT135 NMR and HRMS Spectra of spiroindolopyrrolidines <b>5a-5l</b>   | S14-S37  |
| <sup>1</sup> H, <sup>13</sup> C, DEPT135 NMR and HRMS Spectra of spiroindoloimidazolidines <b>7a-7k</b> | S38-S61  |
| <sup>1</sup> H, <sup>13</sup> C, DEPT135 NMR and HRMS Spectra of spiroindolotriazolidines <b>9a-9i</b>  | S62-S81  |
| HPLC chromatogram for compound <b>5k</b>                                                                | S82      |

### Characterization of compounds **5e-i**, **7f-l**, **9f-j**

*Dimethyl 1-allyl-5'-(2,3-dimethoxyphenyl)-2-oxo-1'-phenylspiro[indoline-3,2'-pyrrolidine]-3',4'-dicarboxylate (5e)*. According to the general procedure, to a solution of aldehyde **2c** (90 mg, 0.54 mmol), amine **3a** (50 mg, 0.54 mmol), DMAD **4c** (85 mg, 0.60 mmol) and copper(I) thiophenecarboxylate (1 mg, 1 mol %) in dichloroethane was transferred diazoamide **1d** (100 mg, 0.50 mmol). Purification furnished the corresponding spiroindolodihydropyrrole **5e** as a white solid; yield: 211 mg (76%);  $R_f = 0.42$  (hexane/EtOAc, 9:1); mp 167-169 °C; IR (neat):  $\nu_{\max}$  3042, 2824, 2804, 1788, 1673, 1623, 1592, 1432, 1310, 1261, 1176, 732, 678  $\text{cm}^{-1}$ ;  $^1\text{H}$  NMR ( $\text{CDCl}_3$ , 400 MHz)  $\delta$  7.46-7.56 (dd,  $J_1 = 1.2$  Hz,  $J_2 = 7.6$  Hz, 1H, ArH), 7.3-7.34 (td,  $J_1 = 0.8$  Hz,  $J_2 = 6.8$  Hz, 1H, ArH), 7.17 (d,  $J_1 = 1.2$  Hz, 2H, ArH), 7.10-7.06 (td,  $J_1 = 0.8$  Hz,  $J_2 = 6.8$  Hz, 1H, ArH), 6.98 (t,  $J = 8$  Hz, 1H, ArH), 6.89-6.84 (m, 3H, ArH), 6.75-6.79 (m, 1H, ArH), 6.63 (s, 1H, ArH), 6.57 (t,  $J = 7.2$  Hz, 1H, ArH), 6.36 (d,  $J = 8.0$  Hz, 2H, ArH), 5.67-5.77 (m, 1H, CH), 5.23 (ddt, 2H,  $J_1 = 17.2$  Hz,  $J_2 = 10.4$  Hz,  $J_3 = 1.2$  Hz,  $\text{CH}_2$ ), 4.31 (ddt, 2H,  $J_1 = 17.2$  Hz,  $J_2 = 10.4$  Hz,  $J_3 = 1.2$  Hz,  $\text{CH}_2$ ), 3.93 (s, 3H,  $\text{OCH}_3$ ), 3.81 (s, 3H,  $\text{OCH}_3$ ), 3.62 (s, 3H,  $\text{OCH}_3$ ), 3.44 (s, 3H,  $\text{OCH}_3$ );  $^{13}\text{C}$  NMR ( $\text{CDCl}_3$ , 100 MHz)  $\delta$  175.28 (C=O), 165.34 (C=O), 163.30 (C=O), 154.34 (*quat-C*), 148.92 (*quat-C*), 146.64 (*quat-C*), 145.74 (*quat-C*), 145.05 (*quat-C*), 135.00 (CH), 133.53 (CH), 133.34 (CH), 132.10 (CH), 131.09 (*quat-C*), 130.91 (CH), 126.67 (CH), 126.22 (CH), 125.25 (CH), 121.64 (CH), 121.46 (CH), 120.24 (CH), 117.45 (CH), 114.34 (CH), 111.79 (CH), 66.3 ( $\text{OCH}_3$ ), 62.87 ( $\text{OCH}_3$ ), 57.72 ( $\text{OCH}_3$ ), 54.34 ( $\text{OCH}_3$ ), 54.22 ( $\text{OCH}_3$ ), 45.04 ( $\text{NCH}_2$ ); HRMS (ESI) Calcd for  $\text{C}_{32}\text{H}_{30}\text{N}_2\text{O}_7$  [(M+H) $^+$ ] 555.2131, found 555.2144.

*tert-Butyl 3'-(naphthalen-1-yl)-2,4',6'-trioxo-2',5'-diphenyl-3',3a',4',5',6',6a'-hexahydro-2'H-spiro[indoline-3,1'-pyrrolo[3,4-c]pyrrole]-1-carboxylate (5f)*. According to the general procedure, to a solution of aldehyde **2d** (65 mg, 0.42 mmol), amine **3a** (40 mg, 0.43 mmol), *N*-phenylmaleimide **4a** (80 mg, 0.46 mmol) and copper(I) thiophenecarboxylate (0.7 mg, 1

mol %) in dichloroethane was transferred diazoamide **1e** (100 mg, 0.39 mmol). Purification furnished the corresponding spiroindolopyrrolidine **5f** as a white solid; yield: 196 mg (79%).  $R_f = 0.44$  (hexane/EtOAc, 9:1); mp 167-169 °C; IR (neat): 3059, 2932, 2864, 1778, 1721, 1653, 1587, 1492, 1468, 1380, 1261, 1176, 1075, 1103, 732, 693, 667  $\text{cm}^{-1}$ ;  $^1\text{H}$  NMR ( $\text{CDCl}_3$ , 400 MHz)  $\delta$  7.88 (s, 1H, ArH), 7.63-7.74 (m, 6H, ArH), 7.28-7.40 (m, 9H, ArH), 6.82 (t,  $J = 7.5$  Hz, 2H, ArH), 6.64-6.69 (m, 3H, ArH), 5.90 (d,  $J = 6.0$  Hz, 1H, CH), 3.98 (d,  $J = 10$  Hz, 1H, CH), 3.61-3.65 (dd,  $J_1 = 6.0$  Hz,  $J_2 = 10$  Hz, 1H, CH), 1.42 (s, 9H, *Nboc*);  $^{13}\text{C}$  NMR ( $\text{CDCl}_3$ , 100 MHz)  $\delta$  175.61 (C=O), 174.45 (C=O), 173.83 (C=O), 148.19 (*quat-C*), 142.28 (*quat-C*), 140.53 (*quat-C*), 137.95 (*quat-C*), 133.37 (*quat-C*), 133.11 (CH), 131.82 (*quat-C*), 130.59 (CH), 129.08 (CH), 128.89 (CH), 128.8 (CH), 128.52 (CH), 128.09 (CH), 128.03 (CH), 127.64 (CH), 126.98 (CH), 126.5 (CH), 126.17 (CH), 126.0 (CH), 125.32 (CH), 124.38 (CH), 124.14 (CH), 123.36 (CH), 115.98 (CH), 84.38 (*quat-C*), 74.74 (*quat-C*), 66.0 (CH), 53.88 (CH), 52.04 (CH), 27.93 (*Nboc*); HRMS (ESI) Calcd for  $\text{C}_{40}\text{H}_{33}\text{N}_3\text{O}_5$   $[(\text{M}+\text{Na})^+]$  658.2318, found 658.2320.

*1-Methyl-3'-(4-nitrophenyl)-2',5'-diphenyl-3,3a'-dihydro-2'H-spiro[indoline-3,1'-pyrrolo[3,4-c]pyrrole]-2,4',6'(5'H,6a'H)-trione (5g)*. According to the general procedure, to a solution of aldehyde **2e** (95 mg, 0.63 mmol), amine **3a** (60 mg, 0.64 mmol), *N*-phenylmaleimide **4a** (120 mg, 0.69 mmol) and copper(I) thiophenecarboxylate (1.1 mg, 1 mol %) in dichloroethane was transferred diazoamide **1c** (100 mg, 0.58 mmol). Purification yielded the corresponding spiroindolopyrrolidine **5g** as a white solid; yield : 132 mg (42%):  $R_f = 0.41$  (hexane/EtOAc, 8:2); mp 157-159 °C; IR (neat): 3038, 2918, 2799, 1758, 1728, 1652, 1622, 1398, 1250, 1075, 1025, 732  $\text{cm}^{-1}$ ;  $^1\text{H}$  NMR ( $\text{CDCl}_3$ , 400 MHz)  $\delta$  7.51 (d,  $J = 1.6$  Hz, 2H, ArH), 7.39-7.43 (m, 2H, ArH), 7.28-7.35 (m, 3H, ArH), 7.20-7.24 (m, 4H, ArH), 7.13-7.18 (m, 1H, ArH), 6.81-6.85 (m, 2H, ArH), 6.71-6.75 (m, 1H, ArH), 6.61-6.65 (m, 3H, ArH), 5.83 (d,  $J = 6.0$  Hz, 1H,  $\text{CH}_2$ ), 4.0 (d,  $J = 10.0$  Hz, 1H, CH), 3.60-3.64 (dd,  $J_1 = 6.0$

Hz,  $J_2 = 10.0$  Hz, 1H, CH), 2.85 (s, 3H, NCH<sub>3</sub>); <sup>13</sup>C NMR (CDCl<sub>3</sub>, 100 MHz)  $\delta$  176.20 (C=O), 175.83 (C=O), 174.78 (C=O), 144.11 (*quat-C*), 142.88 (*quat-C*), 140.84 (*quat-C*), 131.87 (*quat-C*), 130.33 (CH), 129.27 (*quat-C*), 129.15 (CH), 128.80 (CH), 128.77 (CH), 128.32 (CH), 127.73 (CH), 127.01 (CH), 126.94 (CH), 124.15 (CH), 123.97 (CH), 123.51 (CH), 123.23 (CH), 109.04 (CH), 74.51 (*quat-C*), 65.64 (CH), 53.09 (CH), 52.29 (CH), 29.71 (CH), 25.83 (CH<sub>3</sub>). HRMS (ESI) Calculated for C<sub>32</sub>H<sub>24</sub>N<sub>4</sub>O<sub>5</sub> (M+H)<sup>+</sup>: 545.1825 found: 545.1817.

*3'-(4-Bromophenyl)-1-ethyl-2',5'-diphenyl-3',3a'-dihydro-2'H-spiro[indoline-3,1'-pyrrolo[3,4-c]pyrrole]-2,4',6'(5'H,6a'H)-trione (5h)*. According to the general procedure, to a solution of aldehyde **2f** (110 mg, 0.59 mmol), amine **3a** (55 mg, 0.59 mmol), *N*-phenylmaleimide **4a** (110 mg, 0.64 mmol) and copper(I) thiophenecarboxylate (1 mg, 1 mol %) in dichloroethane was transferred diazoamide **1b** (100 mg, 0.53 mmol). Purification furnished the corresponding spiroindolopyrrolidine **5h** as a white solid; yield : 229 mg (73%):  $R_f = 0.42$  (hexane/EtOAc, 7:3); mp 167-169 °C; IR (neat): 3152, 2959, 2912, 2895, 1698, 1653, 1602, 1598, 1398, 1176, 1105, 732, 686 cm<sup>-1</sup>. <sup>1</sup>H NMR (CDCl<sub>3</sub>, 400 MHz)  $\delta$  8.13 (d,  $J = 7.2$  Hz, 1H, ArH), 7.73 (d,  $J = 7.6$  Hz, 2H, ArH), 7.59 (t,  $J = 8$  Hz, 1H, ArH), 7.51 (d,  $J = 7.6$  Hz, 1H, ArH), 7.33-7.46 (m, 3H, ArH), 7.22 (t,  $J = 10$  Hz, 1H, ArH), 7.04 (d,  $J = 8.4$  Hz, 2H, ArH), 6.96 (t,  $J = 8.4$  Hz, 2H, ArH), 6.66-6.74 (m, 3H, ArH), 6.42 (s, 1H, ArH), 6.14 (d,  $J = 6$  Hz, 2H, CH<sub>2</sub>), 3.98 (d,  $J = 10$  Hz, 1H, CH), 3.58-3.62 (dd,  $J_1 = 6$  Hz,  $J_2 = 10$  Hz, 1H, CH), 3.50-3.59 (m, 1H, NCH<sub>2</sub>), 3.25-3.16 (m, 1H, NCH<sub>2</sub>), 0.61 (t,  $J = 7.2$  Hz, 3H, CH<sub>3</sub>); <sup>13</sup>C NMR (CDCl<sub>3</sub>, 100 MHz)  $\delta$  176.20 (C=O), 175.70 (C=O), 174.64 (C=O), 160.38 (*quat-C*), 148.73 (*quat-C*), 143.70 (*quat-C*), 142.02 (*quat-C*), 132.47 (*quat-C*), 131.72 (CH), 130.56 (*quat-C*), 130.41 (CH), 129.27 (CH), 129.03 (CH), 128.42 (CH), 127.0 (CH), 125.00 (CH), 123.75 (CH), 123.65 (CH), 119.14 (CH), 114.40 (CH), 114.32 (CH), 108.94 (CH), 93.21

(*quat-C*), 79.10 (*quat-C*), 74.56 (CH), 53.46 (CH), 52.67 (CH), 34.25 (CH<sub>2</sub>), 12.04 (CH<sub>3</sub>).

HRMS (ESI) Calcd for C<sub>32</sub>H<sub>26</sub>BrN<sub>3</sub>O<sub>3</sub> [(M+Na)<sup>+</sup>] 614.1055, found 614.1049.

*tert-Butyl* 2'-methyl-2,4',6'-trioxo-3',5'-diphenyl-3',3a',4',5',6',6a'-hexahydro-2'H-spiro[indoline-3,1'-pyrrolo[3,4-c]pyrrole]-1-carboxylate (**5i**). According to the general procedure, to a solution of aldehyde **2a** (45 mg, 0.42 mmol), amine **3b** (30 mg, 0.45 mmol), *N*-phenylmaleimide **4a** (80 mg, 0.46 mmol) and copper(I) thiophenecarboxylate (0.7 mg, 1 mol %) in dichloroethane was transferred diazoamide **1e** (100 mg, 0.39 mmol). Purification furnished the corresponding spiroindolopyrrolidine **5i** as a white solid; yield: 159 mg (78%); R<sub>f</sub> = 0.48 (hexane/EtOAc, 7:3); mp 153-154 °C. IR (neat): 3062, 2923, 2854, 1780, 1713, 1613, 1264, 1166, 1025, 1003, 731, 690, 687 cm<sup>-1</sup>; <sup>1</sup>H NMR (CDCl<sub>3</sub>, 400 MHz) δ 7.81 (d, *J* = 8 Hz, 1H, ArH), 7.45-7.48 (m, 3H, ArH), 7.33-7.37 (m, 6H, ArH), 7.22-7.32 (m, 4H, ArH), 4.76 (d, *J* = 6.4 Hz, 1H, CH), 3.75 (d, *J* = 10 Hz, 1H, CH), 3.43-3.48 (dd, *J*<sub>1</sub> = 6.4 Hz, *J*<sub>2</sub> = 10 Hz, 1H, CH), 1.87 (s, 3H, NCH<sub>3</sub>), 1.54 (s, 9H, *Nboc*); <sup>13</sup>C NMR (CDCl<sub>3</sub>, 100 MHz) δ 175.69 (C=O), 174.92 (C=O), 174.07 (C=O), 148.59 (*quat-C*), 140.9 (*quat-C*), 140.51 (*quat-C*), 131.89 (*quat-C*), 130.43 (CH), 129.05 (CH), 128.99 (CH), 128.75 (CH), 128.22 (CH), 127.38 (CH), 127.02 (CH), 126.72 (CH), 125.41 (CH), 123.92 (CH), 115.47 (CH), 84.7 (*quat-C*), 73.85 (CH), 68.73 (CH), 53.66 (CH), 52.63 (CH), 32.54 (CH), 28.12 (*Nboc*); HRMS (ESI) Calcd for C<sub>31</sub>H<sub>29</sub>N<sub>3</sub>O<sub>5</sub> [(M+Na)<sup>+</sup>] 546.2005, found 546.2018.

1'-Allyl-2-(3,4-dimethoxyphenyl)-1,5-bis(4-nitrophenyl)-3-phenylspiro[imidazolidine-4,3'-indolin]-2'-one (**7f**). According to the general procedure, to a solution of aldehyde **2c** (90 mg, 0.54 mmol), amine **3a** (50 mg, 0.54 mmol), (*E*)-4-nitro-*N*-(4-nitrobenzylidene)aniline **6b** (160 mg, 0.6 mmol) and copper(I) thiophenecarboxylate (1 mg, 1 mol %) in dichloroethane was transferred diazoamide **1d** (100 mg, 0.5 mmol). Purification furnished the corresponding spiroindoloimidazolidine **7f** as a white solid; yield: 281 mg (82%); R<sub>f</sub> = 0.42 (hexane/EtOAc, 9:1). mp 167-169 °C. IR (neat): ν<sub>max</sub> 3059, 2932, 2864, 1778, 1721, 1653, 1587, 1492, 1468,

1380, 1261, 1176, 1075, 1103, 732, 693, 667  $\text{cm}^{-1}$ .  $^1\text{H}$  NMR ( $\text{CDCl}_3$ , 400 MHz)  $\delta$  7.16-7.43 (dd,  $J_1 = 1.2$  Hz,  $J_2 = 7.6$  Hz, 2H, ArH), 6.93-6.89 (td,  $J_1 = 0.8$  Hz,  $J_2 = 6.8$  Hz, 2H, ArH), 6.75 (d,  $J_1 = 1.2$  Hz, 3H, ArH), 6.70-6.66 (td,  $J_1 = 0.8$  Hz,  $J_2 = 6.8$  Hz, 2H, ArH), 6.58 (t,  $J = 8$  Hz, 1H, ArH), 6.44-6.49 (m, 4H, ArH), 6.37-6.39 (m, 2H, ArH), 6.23 (s, 1H, ArH), 6.17 (t,  $J = 7.2$  Hz, 1H, ArH), 5.96 (d,  $J = 8.0$  Hz, 3H, ArH), 5.35-5.27 (m, 1H, CH), 4.82 (ddt, 3H,  $J_1 = 17.2$  Hz,  $J_2 = 10.4$  Hz,  $J_3 = 1.2$  Hz,  $\text{CH}_2$ ), 3.88 (ddt, 2H,  $J_1 = 17.2$  Hz,  $J_2 = 10.4$  Hz,  $J_3 = 1.2$  Hz,  $\text{CH}_2$ ), 3.53 (s, 3H,  $\text{OCH}_3$ ), 3.40 (s, 3H,  $\text{OCH}_3$ );  $^{13}\text{C}$  NMR ( $\text{CDCl}_3$ , 100 MHz)  $\delta$  175.28 (C=O), 165.34 (C=O), 163.30 (C=O), 154.34 (quat-C), 150.50 (quat-C), 149.69 (quat-C), 149.01 (quat-C), 148.92 (quat-C), 146.64 (quat-C), 145.74 (quat-C), 145.05 (quat-C), 135.00 (CH), 133.53 (CH), 133.34 (CH), 132.10 (CH), 131.09 (quat-C), 130.91 (CH), 126.67 (CH), 126.22 (CH), 125.25 (CH), 121.64 (CH), 121.46 (CH), 120.24 (CH), 117.45 (CH), 114.34 (CH), 111.79 (CH), 66.3 (CH), 62.87 (CH), 57.72 (CH), 54.34 ( $\text{OCH}_3$ ), 54.22 ( $\text{OCH}_3$ ), 45.04 ( $\text{NCH}_2$ ); HRMS (ESI) Calcd for  $\text{C}_{39}\text{H}_{33}\text{N}_5\text{O}_7$  [(M+H) $^+$ ] 684.2458, found 684.2463.

*Ethyl 1'-methyl-2-(naphthalen-1-yl)-5-(4-nitrophenyl)-2'-oxo-3-phenylspiro[imidazolidine-4,3'-indoline]-1-carboxylate (7g)*. According to the general procedure, to a solution of aldehyde **2d** (100 mg, 0.64 mmol), amine **3a** (60 mg, 0.64 mmol), (*E*)-ethyl 4-nitrobenzylidene carbamate **6c** (155 mg, 0.69 mmol) and copper(I) thiophenecarboxylate (1.1 mg, 1 mol %) in dichloroethane was transferred diazoamide **1c** (100 mg, 0.58 mmol). Purification furnished the corresponding spiroindoloimidazolidine **7g** as a white solid; yield: 285 mg (82%);  $R_f = 0.42$  (hexane/EtOAc, 9:1). mp 167-169  $^\circ\text{C}$ . IR (neat):  $\nu_{\text{max}}$  3058, 2835, 2815, 1784, 1712, 1673, 1597, 1498, 1472, 1477, 1176, 1097, 1102, 753, 685, 653  $\text{cm}^{-1}$ ;  $^1\text{H}$  NMR ( $\text{CDCl}_3$ , 400 MHz)  $\delta$  7.42 (d,  $J = 2.8$ , 1H, ArH), 7.24-7.30 (m, 1H, ArH), 7.18-7.17 (m, 9H, ArH), 7.00-7.04 (m, 1H, ArH), 6.83-6.87 (m, 2H, ArH), 6.58-6.73 (m, 6H, ArH), 5.82 (d,  $J = 9.6$  Hz, 1H, CH), 4.27 (d,  $J = 9.2$  Hz, 1H, CH), 3.45-3.51 (m, 2H), 2.88 (s, 3H,  $\text{OCH}_3$ ),

0.89 (t,  $J = 9.2$  Hz, 3H, NCH<sub>3</sub>); <sup>13</sup>C NMR (CDCl<sub>3</sub>, 100 MHz)  $\delta$  174.89 (C=O), 157.58 (C=O), 142.74 (C=O), 141.25 (quat-C), 135.50 (quat-C), 134.95 (quat-C), 134.33 (quat-C), 132.75 (quat-C), 131.93 (quat-C), 131.89 (quat-C), 131.23 (CH), 131.17 (CH), 130.40 (CH), 128.62 (CH), 127.90 (CH), 127.65 (CH), 127.48 (CH), 127.33 (CH), 126.90 (CH), 126.35 (CH), 122.95 (quat-C), 122.14 (CH), 121.47 (CH), 112.65 (CH), 107.14 (CH), 67.95 (quat-C), 57.62 (CH), 54.01 (CH), 28.23 (CH), 25.29 (CH), 11.01 (CH<sub>3</sub>); HRMS (ESI) Calcd for C<sub>36</sub>H<sub>30</sub>N<sub>4</sub>O<sub>5</sub> [(M+H)<sup>+</sup>] 599.2294, found 599.2311.

*1'-Methyl-1,5-bis(4-nitrophenyl)-3-phenyl-2-(thiophen-2-yl)spiro[imidazolidine-4,3'-indolin]-2'-one (7h)*. According to the general procedure, to a solution of aldehyde **2g** (70 mg, 0.63 mmol), amine **3a** (60 mg, 0.64 mmol), (*E*)-4-nitro-*N*-(4-nitrobenzylidene)aniline **6b** (190 mg, 0.70 mmol) and copper(I) thiophenecarboxylate (1.1 mg, 1 mol %) in dichloroethane was transferred diazoamide **1c** (100 mg, 0.58 mmol). Purification furnished the corresponding spiroindoloimidazolidine **7h** as a white solid; yield: 287 mg (82 %): R<sub>f</sub> = 0.42 (hexane/EtOAc, 7:3); R<sub>f</sub> = 0.48 (hexane/EtOAc, 7:3); mp 153-154 °C. IR (neat):  $\nu_{\max}$  3095, 2913, 2843, 1779, 1710, 1611, 1155, 1027, 1013, 690, 687 cm<sup>-1</sup>; <sup>1</sup>H NMR (CDCl<sub>3</sub>, 400 MHz)  $\delta$  7.61 (t,  $J = 3.6$  Hz, 3H, ArH), 7.45 (t,  $J = 7.6$  Hz, 2H, ArH), 7.29-7.33 (m, 6H, ArH), 7.17 (t,  $J = 7.6$  Hz, 3H, ArH), 7.02-7.10 (m, 7H, ArH), 5.19 (s, 1H, CH), 3.54 (s, 3H, NCH<sub>3</sub>); <sup>13</sup>C NMR (CDCl<sub>3</sub>, 100 MHz)  $\delta$  173.02 (C=O), 160.38 (C=O), 155.7 (C=O), 150.67 (quat-C), 148.99 (quat-C), 148.73 (quat-C), 143.7 (quat-C), 142.02 (CH), 132.47 (CH), 131.72 (quat-C), 130.56 (CH), 130.41 (CH), 129.27 (CH), 129.03 (CH), 128.42 (CH), 127.00 (quat-C), 125.00 (CH), 123.75 (CH), 123.65 (CH), 119.14 (CH), 114.40 (CH), 114.32 (CH), 108.94 (CH), 79.1 (CH), 74.56 (quat-C), 55.41 (CH), 34.25 (CH<sub>3</sub>); HRMS (ESI) Calcd for C<sub>33</sub>H<sub>25</sub>N<sub>5</sub>O<sub>5</sub>S [(M+Na)<sup>+</sup>] 626.1474, found 626.1487.

*tert-Butyl 2-(4-nitrophenyl)-2'-oxo-3,5-diphenyl-1-tosylspiro[imidazolidine-4,3'-indoline]-1'-carboxylate (7i)*. According to the general procedure, to a solution of aldehyde **2e** (65 mg,

0.42 mmol), amine **3a** (40 mg, 0.43 mmol), *N*-benzylidene benzenesulfonamide **6a** (120 mg, 0.46 mmol) and copper(I) thiophenecarboxylate (0.7 mg, 1 mol %) catalyst in dichloroethane was transferred diazoamide **1e** (100 mg, 0.39 mmol). Purification gave the corresponding product spiroindoloimidazolidine **7i** as a white solid; yield : 229 mg (82%); mp 167-169 °C; IR (neat):  $\nu_{\max}$  3062, 2942, 2934, 1768, 1728, 1647, 1636, 1393, 1380, 1261, 1075, 1103, 732, 676  $\text{cm}^{-1}$ ;  $^1\text{H}$  NMR ( $\text{CDCl}_3$ , 400MHz)  $\delta$  7.55-7.61 (m, 3H, ArH), 7.38-7.51 (m, 8H, ArH), 7.29 (s, 1H, ArH), 7.16-7.20 (m, 3H, ArH), 7.00-7.06 (m, 3H, ArH), 6.94 (d,  $J = 7.6$  Hz, 2H, ArH), 6.80 (d,  $J = 7.6$  Hz, 2H, ArH), 6.61-6.63 (m, 1H, ArH), 5.58 (s, 1H, CH), 2.62 (s, 3H,  $\text{CH}_3$ ), 0.79 (s, 9H, *N*boc);  $^{13}\text{C}$  NMR ( $\text{CDCl}_3$ , 100 MHz)  $\delta$  174.10 (C=O), 148.63 (C=O), 144.76 (C=O), 144.31 (*quat-C*), 140.58 (*quat-C*), 136.39 (*quat-C*), 133.51 (*quat-C*), 131.76 (CH), 130.47 (CH), 130.36 (CH), 130.23 (*quat-C*), 130.13 (*quat-C*), 129.99 (CH), 128.29 (*quat-C*), 126.23 (CH), 124.90 (CH), 124.71 (CH), 122.43 (CH), 120.45 (CH), 115.32 (CH), 110.21 (CH), 94.63 (CH), 86.54 (*quat-C*), 78.19 (CH), 75.62 (*quat-C*), 26.96 (CH), 19.27 (*N*boc); HRMS (ESI) Calcd for  $\text{C}_{40}\text{H}_{36}\text{N}_4\text{O}_7\text{S}$  [(M+Na) $^+$ ] 739.2202, found 739.2219.

*2-(4-Bromophenyl)-1'-methyl-3,5-diphenyl-1-tosylspiro[imidazolidine-4,3'-indolin]-2'-one* (**7j**). According to the general procedure, to a solution of aldehyde **2f** (120 mg, 0.65 mmol), amine **3a** (60 mg, 0.64 mmol), *N*-benzylidene benzenesulfonamide **6a** (180 mg, 0.69 mmol) and copper(I) thiophenecarboxylate (1.1 mg, 1 mol %) in dichloromethane was transferred diazoamide **1c** (100 mg, 0.58 mmol). Purification furnished the corresponding spiroindoloimidazolidine **7j** as a white solid; yield: 297 mg (77%); Eluent: hexane/EtOAc, 90:10. mp 163-165 °C; IR (neat):  $\nu_{\max}$  3062, 2924, 2854, 1780, 1711, 1613, 1597, 1492, 1455, 1435, 1379, 1310, 1261, 1176, 1029, 732, 693, 667  $\text{cm}^{-1}$ ;  $^1\text{H}$  NMR ( $\text{CDCl}_3$ , 400 MHz)  $\delta$  7.75-7.83 (m, 3H, ArH), 7.53-7.71 (m, 10H, ArH), 7.49 (s, 1H, ArH), 7.20-7.40 (m, 4H, ArH), 7.12 (d,  $J = 7.2$  Hz, 2H, ArH), 7.01 (d,  $J = 8$  Hz, 2H, ArH), 6.81-6.83 (m, 1H, ArH), 5.78 (s, 1H, CH), 3.28 (s, 3H,  $\text{CH}_3$ ), 2.81 (s, 3H,  $\text{NCH}_3$ );  $^{13}\text{C}$  NMR ( $\text{CDCl}_3$ , 100 MHz)  $\delta$  172.16



(C=O), 146.69 (C=O), 142.83 (C=O), 142.37 (*quat-C*), 138.64 (*quat-C*), 134.45 (*quat-C*), 131.57 (CH), 129.82 (CH), 128.53 (CH), 128.42 (CH), 128.29 (*quat-C*), 128.19 (CH), 128.05 (CH), 126.35 (CH), 124.29 (*quat-C*), 122.78 (CH), 122.97 (*quat-C*), 122.78 (CH), 120.49 (CH), 118.51 (CH), 113.38 (CH), 108.27 (CH), 92.69 (CH), 84.61 (*quat-C*), 75.93 (CH), 73.68 (*quat-C*), 31.10 (CH), 25.02 (NCH<sub>3</sub>); HRMS (ESI) Calcd for C<sub>36</sub>H<sub>30</sub>BrN<sub>3</sub>O<sub>3</sub>S [(M+H)<sup>+</sup>]: 664.1270 found 664.1282.

*Ethyl 1'-benzyl-3-methyl-5-(4-nitrophenyl)-2'-oxo-2-phenylspiro[imidazolidine-4,3'-indoline]-1-carboxylate (7k)*. According to the general procedure, to a solution of aldehyde **2a** (45 mg, 0.43 mmol), amine **3b** (30 mg, 0.45 mmol), (*E*)-ethyl 4-nitrobenzylidene carbamate **6c** (107 mg, 0.48 mmol) and copper(I) thiophenecarboxylate (0.8 mg, 1 mol %) in dichloroethane was transferred diazoamide **1a** (100 mg, 0.4 mmol). Purification furnished the corresponding spiroindoloimidazolidine **7k** as a white solid; yield: 164 mg (73%). mp 153-154 °C. IR (neat):  $\nu_{\max}$  3062, 2915, 2874, 1780, 1713, 1613, 1264, 1166, 1025, 1003, 731, 690, 687 cm<sup>-1</sup>. <sup>1</sup>H NMR (CDCl<sub>3</sub>, 400 MHz)  $\delta$  8.12 (d, *J* = 7.2 Hz, 1H, ArH), 7.80-7.56 (m, 2H, ArH), 7.65-7.47 (m, 6H, ArH), 7.61-7.64 (m, 4H, ArH), 7.50-7.54 (m, 1H, ArH), 6.23-6.37 (m, 3H, ArH), 7.10-7.19 (m, 6H, ArH), 6.31 (d, *J* = 9.2 Hz, 1H, CH), 5.79 (m, 2H, CH), 3.45-3.51 (d, *J* = 9.2 Hz, 1H, CH), 2.13 (s, 3H, CH<sub>3</sub>); <sup>13</sup>C NMR (CDCl<sub>3</sub>, 100 MHz)  $\delta$  174.89 (C=O), 157.57 (C=O), 142.73 (C=O), 141.25 (*quat-C*), 135.49 (*quat-C*), 134.95 (*quat-C*), 134.33 (*quat-C*), 132.75 (*quat-C*), 131.93 (*quat-C*), 131.89 (*quat-C*), 131.22 (CH), 131.17 (CH), 130.39 (CH), 128.61 (CH), 127.90 (CH), 127.64 (CH), 127.48 (CH), 127.32 (CH), 126.90 (CH), 126.34 (*quat-C*), 122.95 (CH), 122.14 (CH), 121.46 (CH), 112.64 (CH), 107.14 (CH), 67.95 (CH), 62.81 (*quat-C*), 57.62 (CH), 54.01 (CH), 28.22 (CH<sub>2</sub>), 11.01 (CH<sub>3</sub>); HRMS (ESI) Calcd for C<sub>33</sub>H<sub>30</sub>N<sub>4</sub>O<sub>5</sub> [(M+H)<sup>+</sup>]: 563.2294, found 563.2305.

*Ethyl 1'-benzyl-3-(4-bromophenyl)-5-(4-nitrophenyl)-2'-oxo-2-phenylspiro[imidazolidine-4,3'-indoline]-1-carboxylate (7l)*. According to the general procedure, to a solution of aldehyde **2a** (45 mg, 0.42 mmol), amine **3c** (75 mg, 0.44 mmol), (*E*)-ethyl 4-nitrobenzylidene-carbamate **6c** (105 mg, 0.47 mmol) and copper(I) thiophenecarboxylate (0.8 mg, 1 mol %) in dichloroethane was transferred diazoamide **1a** (100 mg, 0.4 mmol). Purification furnished the corresponding spiroindoloimidazolidine **7l** as a white solid; yield: 205 mg (73%).  $R_f = 0.42$  (hexane/EtOAc, 9:1); mp 167-169 °C. IR (neat):  $\nu_{\max}$  3052, 2911, 2862, 1780, 1711, 1613, 1486, 1455, 1379, 1342, 1261, 1035, 863, 685, 672  $\text{cm}^{-1}$ .  $^1\text{H}$  NMR ( $\text{CDCl}_3$ , 400 MHz)  $\delta$  7.41 (d,  $J = 4.8$  Hz, 1H, ArH), 7.24-7.30 (m, 2H, ArH), 7.11-7.21 (m, 10H, ArH), 7.02 (t,  $J = 4.8$  Hz, 1H, ArH), 6.83-6.87 (m, 2H, ArH), 6.67-6.73 (m, 5H, ArH), 6.01 (d,  $J = 5.2$  Hz, 1H, ArH), 5.81 (d,  $J = 9.2$  Hz, 1H, CH), 5.29-5.28 (m, 2H,  $\text{CH}_2$ ), 4.28 (d,  $J = 9.6$  Hz, 1H, CH), 3.45-3.51 (m, 2H, CH), 0.89 (t,  $J = 4$  Hz, 3H,  $\text{CH}_3$ );  $^{13}\text{C}$  NMR ( $\text{CDCl}_3$ , 100 MHz)  $\delta$  175.88 (C=O), 158.57 (C=O), 143.73 (C=O), 1421.24 (*quat-C*), 136.49 (*quat-C*), 134.94 (*quat-C*), 135.32 (*quat-C*), 133.75 (*quat-C*), 132.92 (*quat-C*), 132.88 (*quat-C*), 132.22 (CH), 131.16 (CH), 131.39 (CH), 129.61 (CH), 128.89 (CH), 127.64 (CH), 127.47 (CH), 127.32 (CH), 127.89 (CH), 127.34 (*quat-C*), 123.94 (CH), 123.13 (CH), 122.46 (CH), 113.64 (CH), 108.14 (CH), 68.94 (CH), 63.81 (*quat-C*), 58.62 (CH), 28.22 ( $\text{CH}_2$ ), 26.28 ( $\text{CH}_2$ ), 11.99 ( $\text{CH}_3$ ). HRMS (ESI) Calcd for  $\text{C}_{38}\text{H}_{31}\text{BrN}_4\text{O}_5$  [(M+H) $^+$ ] 703.1556, found 703.1569.

*Diethyl 4'-(4-nitrophenyl)-1-methyl-2-oxo-5'-phenylspiro[indoline-3,3'-[1,2,4]triazolidine]-1',2'-dicarboxylate (9f)*. According to the general procedure, to a solution of aldehyde **2e** (95 mg, 0.63 mmol), amine **3a** (60 mg, 0.64 mmol), DEAD **8b** (120 mg, 0.69 mmol) and copper(I) thiophenecarboxylate (1.1 mg, 1 mol %) in dichloroethane was transferred diazoamide **1c** (100 mg, 0.58 mmol). Purification furnished the corresponding spiroindolotriazolidine **9f** as a white solid; yield: 237 mg (73 %);  $R_f = 0.32$  (hexane/EtOAc, 8:2); mp 167-169 °C. IR (neat):  $\nu_{\max}$  3062, 2924, 2854, 1780, 1711, 1613, 1597, 1492, 1455,

1435, 1379, 1310, 1261, 1176, 1029, 732, 693, 667  $\text{cm}^{-1}$ ;  $^1\text{H}$  NMR ( $\text{CDCl}_3$ , 400 MHz)  $\delta$  8.03-8.05 (m, 2H, ArH), 7.81 (d,  $J = 7.6$  Hz, 1H, ArH), 7.48-7.57 (m, 2H, ArH), 7.39-7.42 (m, 5H, ArH), 7.22-7.27 (m, 4H, ArH), 6.95-7.22 (m, 2H, ArH), 6.84 (d,  $J = 8.0$  Hz, 2H, ArH), 4.53 (s, 1H, CH), 3.09 (s, 3H,  $\text{NCH}_3$ );  $^{13}\text{C}$  NMR ( $\text{CDCl}_3$ , 100 MHz)  $\delta$  176.07 (C=O), 171.84 (C=O), 163.66 (C=O), 143.81 (quat-C), 137.09 (quat-C), 134.78 (quat-C), 133.99 (CH), 130.49 (quat-C), 130.07 (CH), 129.73 (quat-C), 129.56 (quat-C), 129.31 (quat-C), 129.18 (quat-C), 128.77 (quat-C), 128.70 (quat-C), 128.63 (CH), 127.82 (quat-C), 125.53 (CH), 122.85 (CH), 108.63 (CH), 52.42 ( $\text{OCH}_3$ ), 35.22 ( $\text{NCH}_3$ ); HRMS (ESI) Calcd for  $\text{C}_{30}\text{H}_{22}\text{N}_6\text{O}_5$  [(M+Na) $^+$ ] 569.1549, found 569.1562.

*Diethyl*                      *4'-(4-bromophenyl)-1-ethyl-5-nitro-2-oxo-5'-phenylspiro[indoline-3,3'-[1,2,4]triazolidine]-1',2'-dicarboxylate (9g)*. According to the general procedure, to a solution of aldehyde **2f** (110 mg, 0.60 mmol), amine **3a** (55 mg, 0.59 mmol), DEAD **8b** (110 mg, 0.63 mmol) and copper(I) thiophenecarboxylate (1 mg, 1 mol %) in dichloroethane was transferred diazoamide **1b** (100 mg, 0.53 mmol). Purification furnished the corresponding spiroindolotriazolidine **9g** as a white solid; yield: 233 mg (74 %):  $R_f = 0.42$  (hexane/EtOAc, 9:1; mp 167-169  $^\circ\text{C}$ . IR (neat):  $\nu_{\text{max}}$  3059, 2932, 2864, 1778, 1721, 1653, 1587, 1492, 1468, 1380, 1261, 1176, 1075, 1103, 732, 693, 667  $\text{cm}^{-1}$ ;  $^1\text{H}$  NMR ( $\text{CDCl}_3$ , 400 MHz)  $\delta$  8.03-8.06 (m, 2H, ArH), 7.55 (d,  $J = 5.6$  Hz, 2H, ArH), 7.51-7.54 (m, 3H, ArH), 7.38-7.42 (m, 5H, ArH), 7.22-7.27 (m, 4H, ArH), 6.95-7.21 (m, 1H, ArH), 6.85 (d,  $J = 8.0$  Hz, 1H, ArH), 4.53 (s, 1H, CH), 3.73 (q,  $J = 7.2$  Hz, 2H,  $\text{NCH}_2$ ), 1.23 (t,  $J = 7.2$  Hz, 3H,  $\text{CH}_3$ );  $^{13}\text{C}$  NMR ( $\text{CDCl}_3$ , 100 MHz)  $\delta$  175.78 (C=O), 171.56 (C=O), 161.22 (C=O), 143.53 (quat-C), 136.81 (quat-C), 133.71 (CH), 130.20 (CH), 129.78 (CH), 129.44 (quat-C), 129.28 (quat-C), 129.02 (CH), 128.89 (CH), 128.49 (CH), 128.42 (CH), 128.35 (CH), 127.54 (CH), 125.24 (CH), 122.57 (CH), 108.35 (CH), 52.14 (CH), 34.94 ( $\text{CH}_2$ ), 12.72 ( $\text{CH}_3$ ); HRMS (ESI) Calcd for  $\text{C}_{31}\text{H}_{24}\text{BrN}_5\text{O}_3$  [(M+Na) $^+$ ] 616.0960, found 616.0978.

*Diethyl*      *1,4'-dimethyl-2-oxo-5'-phenylspiro[indoline-3,3'-[1,2,4]triazolidine]-1',2'-dicarboxylate (9h)*. According to the general procedure, to a solution of aldehyde **2a** (65 mg, 0.61 mmol), amine **3b** (45 mg, 0.67 mmol), DEAD **8b** (120 mg, 0.69 mmol) and copper(I) thiophenecarboxylate (1.1 mg, 1 mol %) in dichloroethane was transferred diazoamide **1c** (100 mg, 0.58 mmol). Purification furnished the corresponding spiroindolotriazolidine **9h** as a white solid; yield: 180 mg (71 %):  $R_f = 0.27$  (hexane/EtOAc, 7:3); mp 153-154 °C. IR (neat):  $\nu_{\max}$  3048, 2935, 2565, 1879, 1723, 1623, 1274, 1168, 1024, 1008, 690, 687  $\text{cm}^{-1}$ ;  $^1\text{H}$  NMR ( $\text{CDCl}_3$ , 400 MHz)  $\delta$  7.81 (d,  $J = 8$  Hz, 1H, ArH), 7.45-7.48 (m, 2H, ArH), 7.33-7.37 (m, 3H, ArH), 7.22-7.32 (m, 3H, ArH), 4.76 (d,  $J = 6.4$  Hz, 1H, CH), 4.75 (q,  $J = 7.2$  Hz, 2H, CH), 3.86 (d,  $J = 7.2$  Hz, 1H, CH), 3.59 (d,  $J = 7.2$  Hz, 1H, CH), 2.74 (s, 3H,  $\text{CH}_3$ ), 1.87 (s, 3H,  $\text{NCH}_3$ ), 1.24 (t,  $J = 7.2$  Hz, 3H,  $\text{CH}_3$ ), 1.11 (t,  $J = 7.2$  Hz, 3H,  $\text{CH}_3$ );  $^{13}\text{C}$  NMR ( $\text{CDCl}_3$ , 100 MHz)  $\delta$  175.69 (C=O), 174.92 (C=O), 174.07 (C=O), 148.59 (*quat-C*), 140.90 (*quat-C*), 140.51 (*quat-C*), 131.89 (*quat-C*), 130.43 (CH), 129.05 (CH), 128.99 (CH), 128.75 (CH), 128.22 (CH), 127.38 (CH), 127.02 (CH), 126.72 (CH), 125.41 (CH), 123.92 (CH), 115.47 (CH), 73.85 (*quat-C*), 68.73 (CH), 53.66 (CH), 52.63 (CH), 32.54 ( $\text{NCH}_3$ ), 28.12 ( $\text{CH}_3$ ), 14.64 (CH), 13.27 (CH); HRMS (ESI) Calcd for  $\text{C}_{23}\text{H}_{26}\text{N}_4\text{O}_5$  [(M+Na) $^+$ ] 461.1801, found 461.1817.

*tert-Butyl*    *1',2'-diethyl*    *4'-(4-bromophenyl)-5-nitro-2-oxo-5'-phenylspiro[indoline-3,3'-[1,2,4]triazolidine]-1,1',2'-tricarboxylate (9i)*. According to the general procedure, to a solution of aldehyde **2a** (45 mg, 0.4 mmol), amine **3c** (80 mg, 0.4 mmol), DEAD **8b** (80 mg, 0.46 mmol) and copper(I) thiophenecarboxylate (1.1 mg, 1 mol %) in dichloroethane was transferred diazoamide **1i** (100 mg, 0.33 mmol). Purification furnished the corresponding spiroindolotriazolidine **9i** as a white solid; yield : 214 mg (77%):  $R_f = 0.44$  (hexane/EtOAc, 9:1); mp 167-169 °C; IR (neat):  $\nu_{\max}$  3059, 2932, 2864, 1778, 1721, 1653, 1587, 1492, 1468, 1380, 1261, 1176, 1075, 1103, 732, 693, 667  $\text{cm}^{-1}$ ;  $^1\text{H}$  NMR ( $\text{CDCl}_3$ , 400 MHz)  $\delta$  7.59 (t,  $J =$

7.6 Hz, 2H, ArH), 7.38 (t,  $J = 7.6$  Hz, 2H, ArH), 7.30 (d,  $J = 8.0$  Hz, 2H, ArH), 7.09-7.17 (m, 2H), 7.90-7.09 (m, 3H), 6.75 (d,  $J = 7.6$  Hz, 1H, ArH), 7.64 (d,  $J = 7.6$  Hz, 1H, ArH), 3.78-3.87 (m, 4H, CH<sub>2</sub>), 1.30-1.35 (m, 6H, CH<sub>3</sub>), 0.80 (s, 9H, *N*boc); <sup>13</sup>C NMR (CDCl<sub>3</sub>, 100 MHz)  $\delta$  171.45 (C=O), 167.51 (C=O), 161.92 (C=O), 143.89 (*quat-C*), 137.17 (*quat-C*), 132.56 (*quat-C*), 132.15 (CH), 129.95 (CH), 129.50 (CH), 128.91 (CH), 128.66 (CH), 125.74 (CH), 125.56 (CH), 123.53 (CH), 123.19 (CH), 118.16 (CH), 110.04 (CH), 78.18 (*quat-C*), 69.66 (*quat-C*), 63.22 (CH), 36.11 (CH), 14.64 (CH), 13.27 (CH), 10.99 (CH); HRMS (ESI) Calcd for C<sub>32</sub>H<sub>32</sub>BrN<sub>5</sub>O<sub>9</sub> [(M+Na)<sup>+</sup>] 732.1281, found 732.1296.

*Diethyl 4'-(4-bromophenyl)-1-methyl-2-oxo-5'-phenylspiro[indoline-3,3'-[1,2,4]triazolidine]-1',2'-dicarboxylate (9j)*. According to the general procedure, to a solution of aldehyde **2a** (70 mg, 0.66 mmol), amine **3c** (120 mg, 0.65 mmol), DEAD **8b** (120 mg, 0.69 mmol), copper(I) thiophenecarboxylate (1.1 mg, 1 mol %) in dichloroethane was transferred diazoamide **1c** (100 mg, 0.58 mmol). Purification furnished the corresponding spiroindolotriazolidine **9j** as a white solid; yield: 282 mg (84 %).  $R_f = 0.41$  (hexane/EtOAc, 9:1); mp 163-165 °C; IR (neat):  $\nu_{\max}$  3072, 2954, 2834, 1740, 1721, 1623, 1584, 1495, 1465, 1379, 1331, 116, 732, 669 cm<sup>-1</sup>; <sup>1</sup>H NMR (CDCl<sub>3</sub>, 400 MHz)  $\delta$  7.61 (t,  $J = 7.2$  Hz, 2H, ArH), 7.46 (t,  $J = 8.0$  Hz, 1H, ArH), 7.30-7.33 (m, 4H, ArH), 7.18 (t,  $J = 8.0$  Hz, 2H, ArH), 7.00-7.10 (m, 5H, ArH), 4.07 (q,  $J = 7.2$  Hz, 2H, NCH<sub>2</sub>), 3.82-3.91 (m, 1H, NCH), 3.54-3.63 (m, 1H, NCH), 2.73 (s, 3H, NCH<sub>3</sub>), 1.27 (t,  $J = 7.2$  Hz, 3H, CH<sub>3</sub>), 1.12 (t,  $J = 7.2$  Hz, 3H, CH<sub>3</sub>); <sup>13</sup>C NMR (CDCl<sub>3</sub>, 100 MHz)  $\delta$  170.65 (C=O), 166.71 (C=O), 161.12 (C=O), 143.09 (*quat-C*), 136.37 (*quat-C*), 131.76 (*quat-C*), 137.35 (*quat-C*), 129.15 (*quat-C*), 128.70 (CH), 128.11 (CH), 127.86 (CH), 124.94 (CH), 124.78 (CH), 122.73 (CH), 122.39 (CH), 117.36 (CH), 109.24 (CH), 77.38 (*quat-C*), 76.43 (CH), 68.86 (CH<sub>2</sub>), 62.42 (CH), 35.31 (CH<sub>2</sub>), 25.02 (CH<sub>3</sub>), 13.84 (CH<sub>3</sub>), 12.47 (CH<sub>3</sub>); HRMS (ESI) Calcd for C<sub>28</sub>H<sub>27</sub>BrN<sub>4</sub>O<sub>5</sub> [(M+H)<sup>+</sup>] 579.1243, found 579.1252.

# <sup>1</sup>H NMR and <sup>13</sup>C NMR, DEPT135 NMR Spectra of spiroindolopyrrolidines

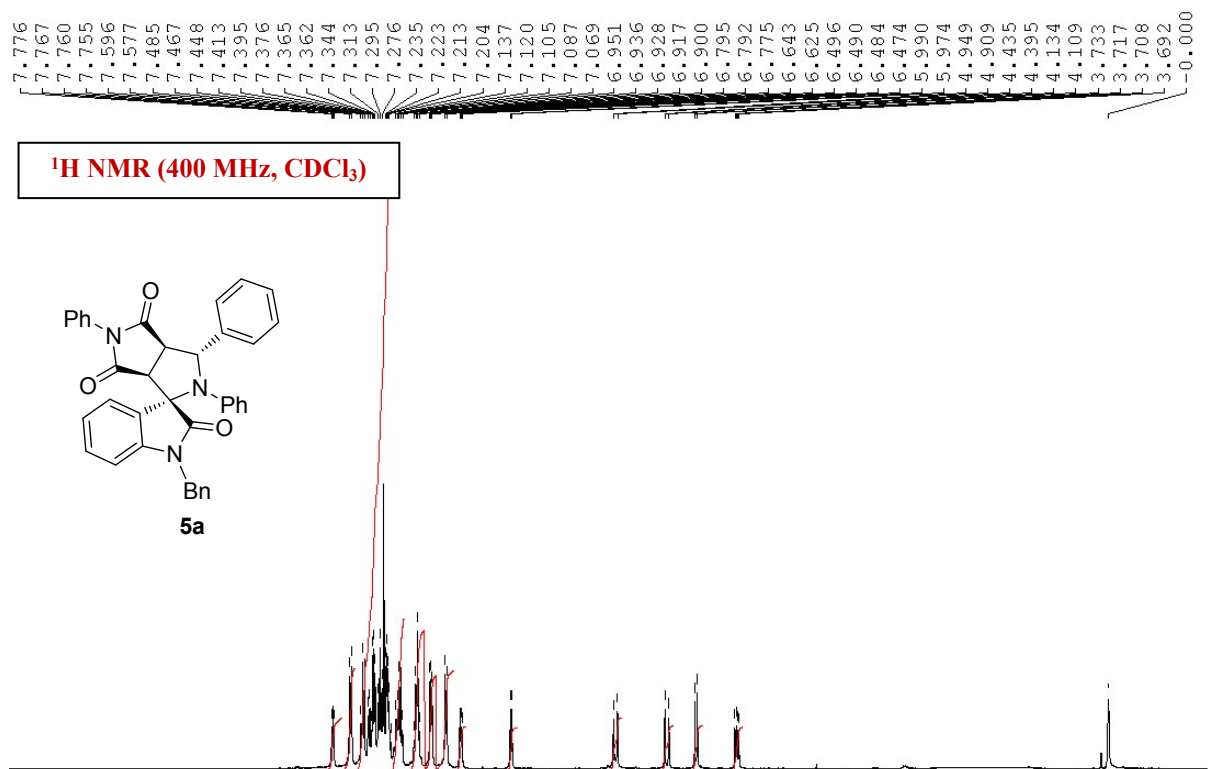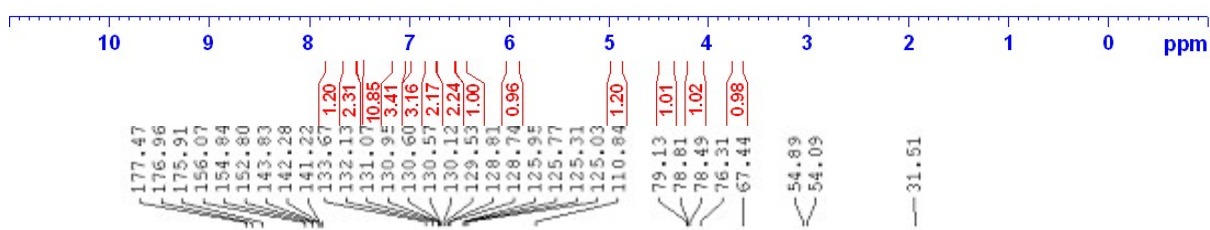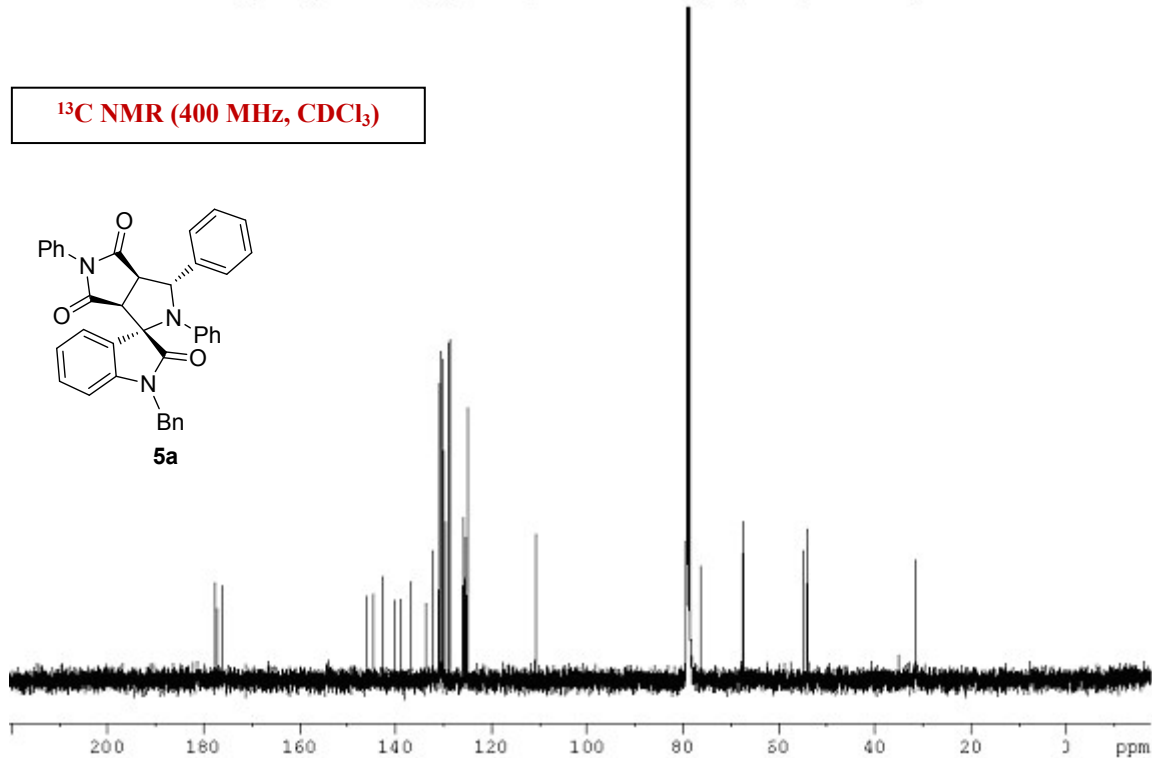

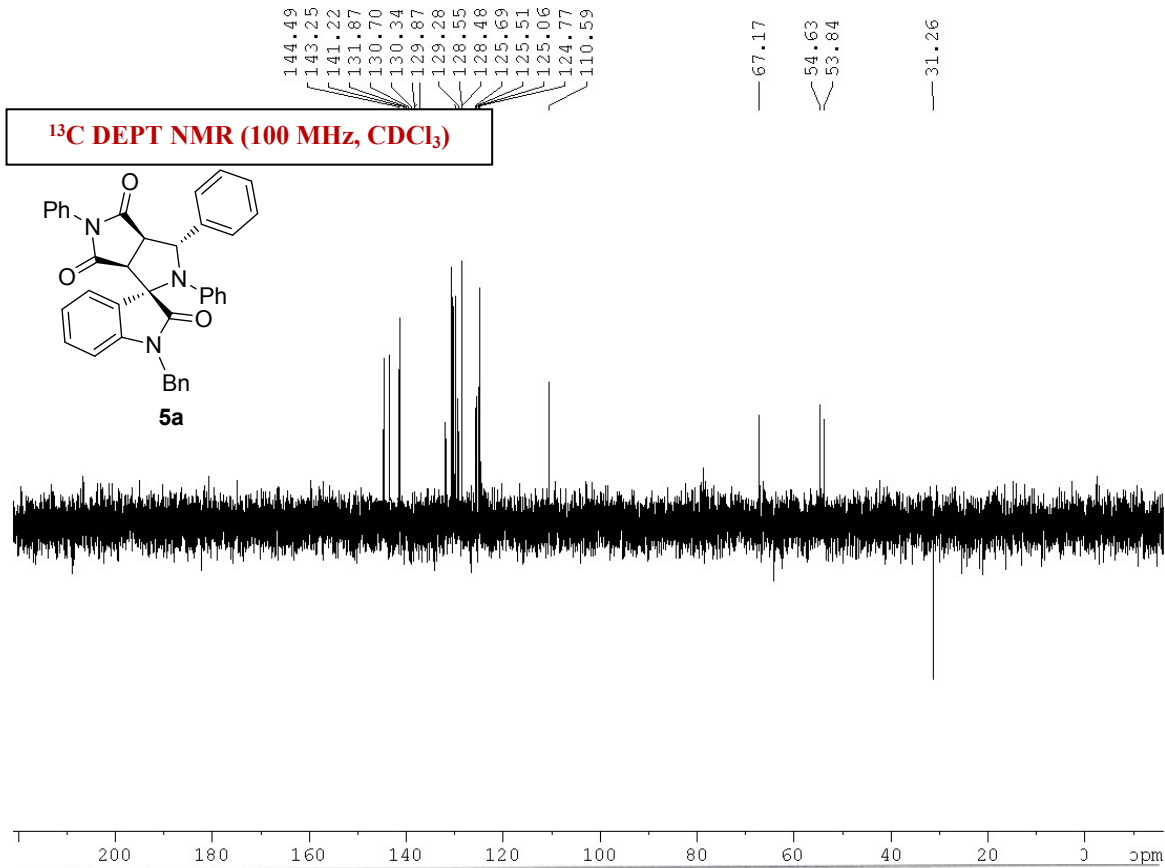

**Acquisition Parameter**

|             |            |                       |           |                  |           |
|-------------|------------|-----------------------|-----------|------------------|-----------|
| Source Type | ESI        | Ion Polarity          | Positive  | Set Nebulizer    | 0.3 Bar   |
| Focus       | Not active | Set Capillary         | 4500 V    | Set Dry Heater   | 180 °C    |
| Scan Begin  | 50 m/z     | Set End Plate Offset  | -500 V    | Set Dry Gas      | 4.0 l/min |
| Scan End    | 1500 m/z   | Set Collision Cell RF | 100.0 Vpp | Set Divert Valve | Source    |

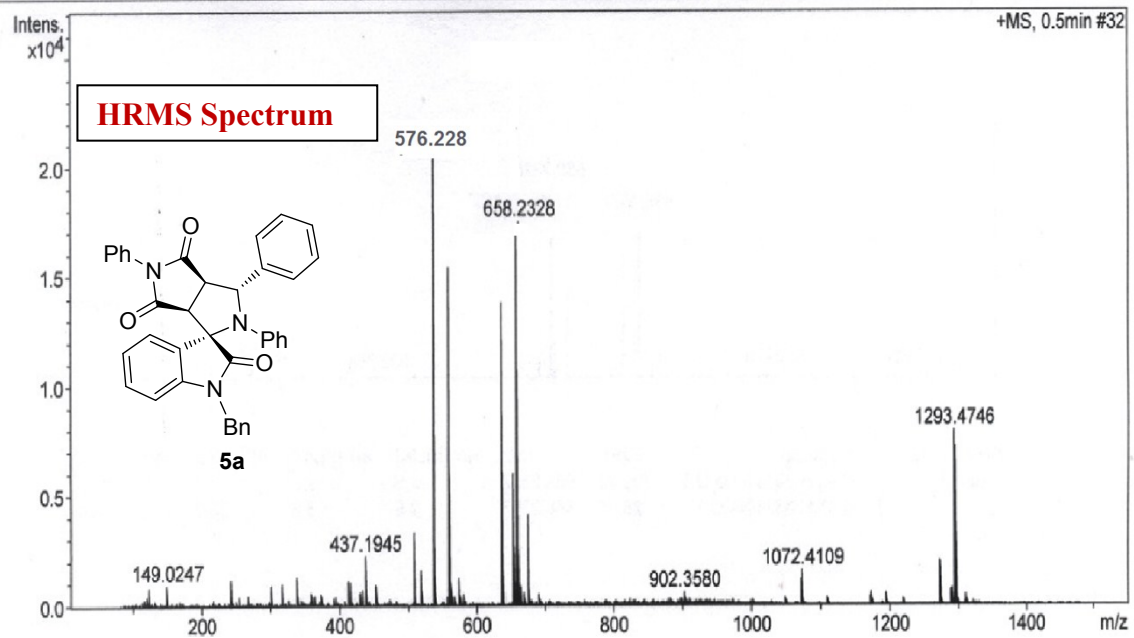

**<sup>1</sup>H NMR (100 MHz, CDCl<sub>3</sub>)**

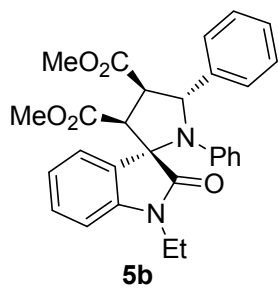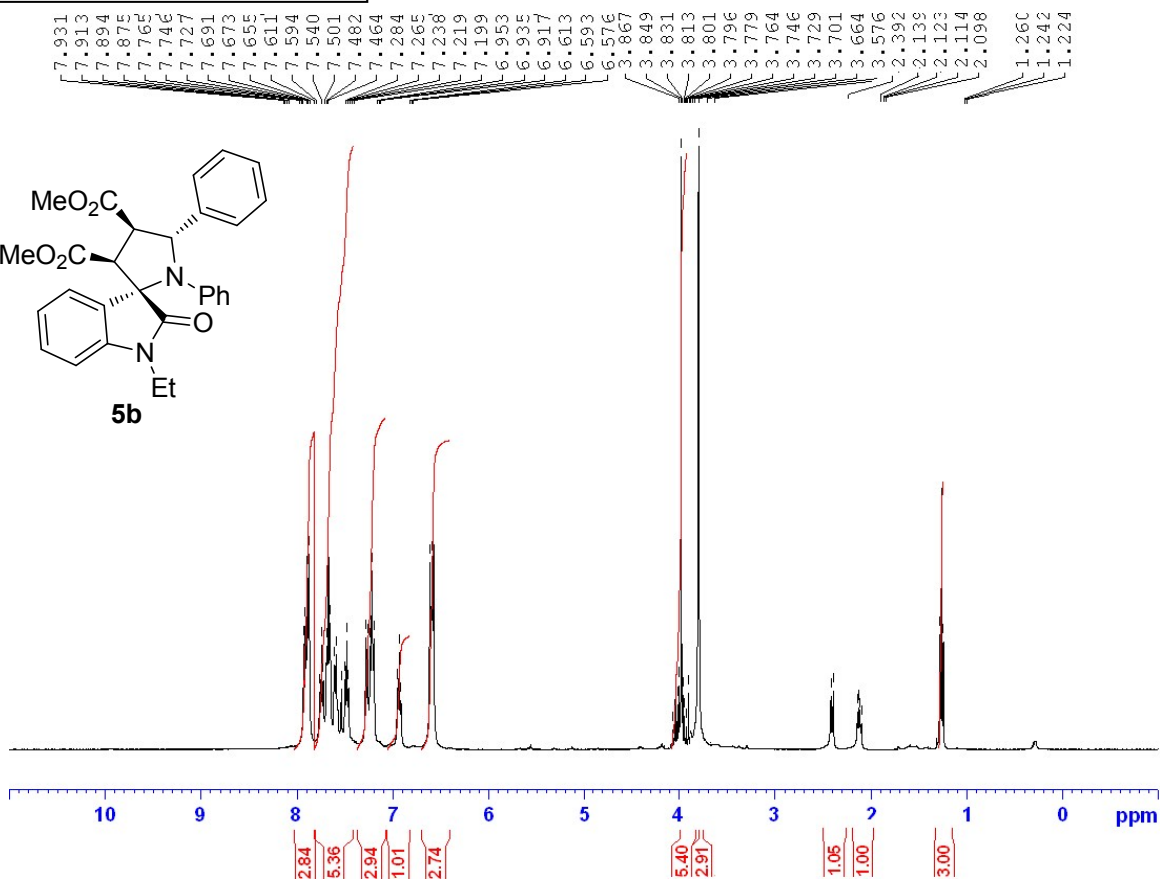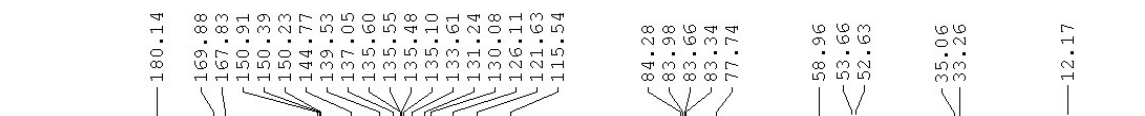

**<sup>13</sup>C NMR (400 MHz, CDCl<sub>3</sub>)**

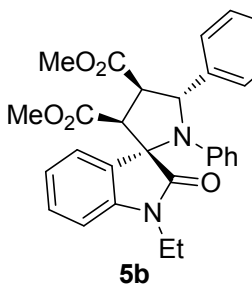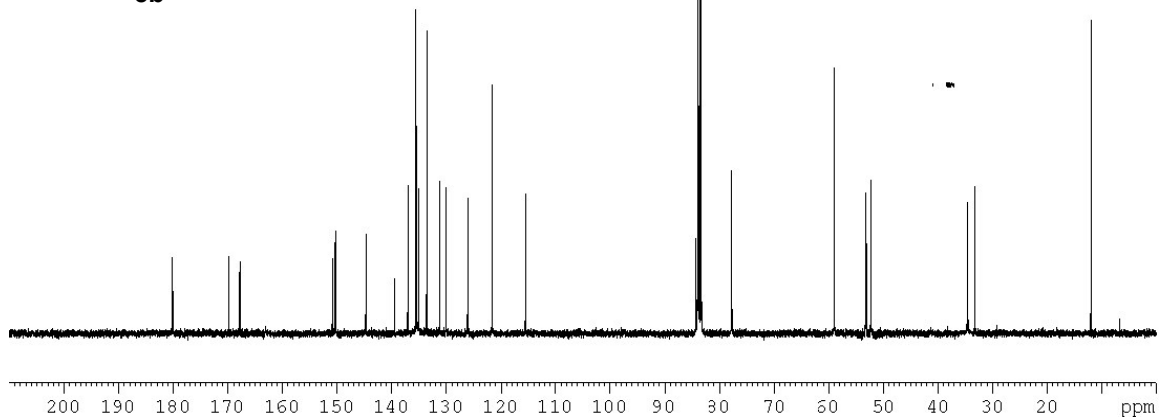



### <sup>13</sup>C DEPT NMR (100 MHz, CDCl<sub>3</sub>)

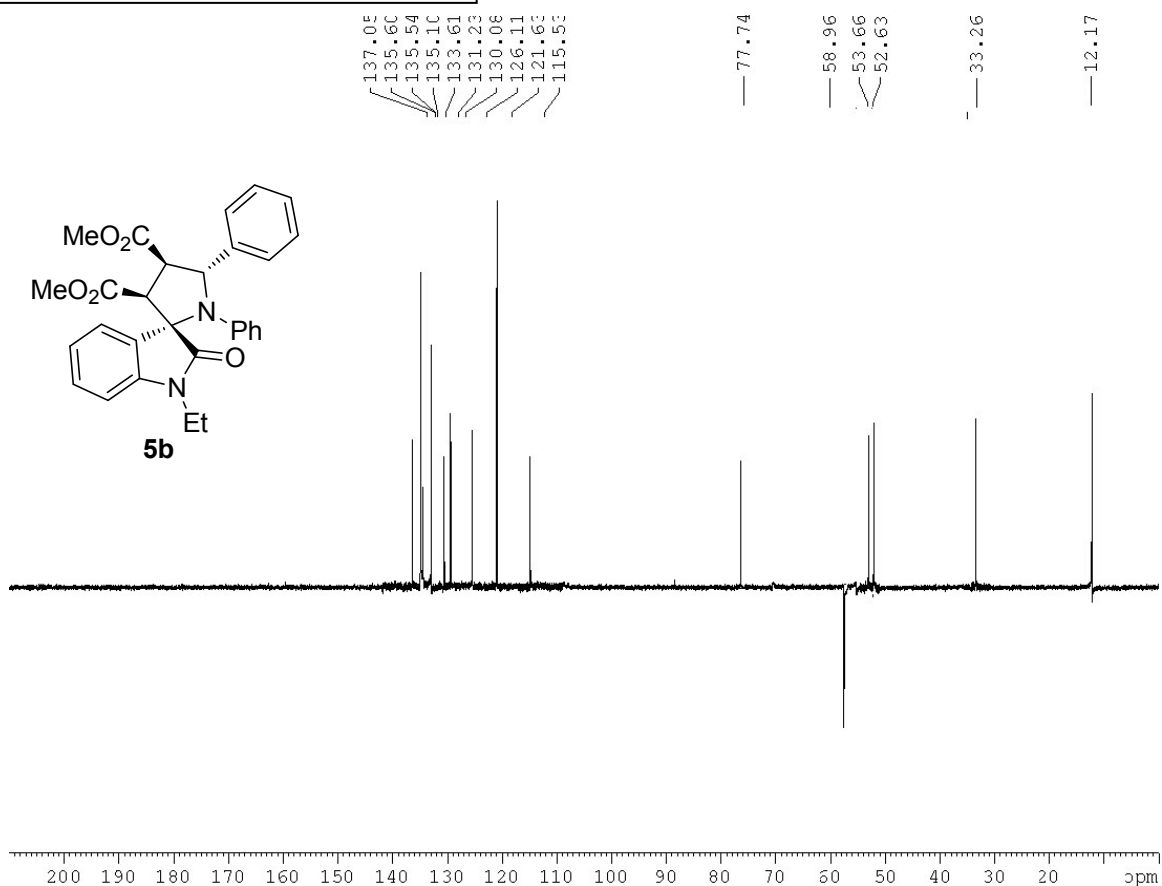

### HRMS Spectrum

#### Analysis Info

Analysis Name D:\Data\OCT\_2013\897.d  
Method tune\_wide.m  
Sample Name TM 1:100  
Comment

Acquisition Date 10/24/2013 11:19:18 AM

Operator Sharma/Singh  
Instrument / Ser# micrOTOF-Q II 10262

#### Acquisition Parameter

|             |          |                       |           |                  |           |
|-------------|----------|-----------------------|-----------|------------------|-----------|
| Source Type | ESI      | Ion Polarity          | Positive  | Set Nebulizer    | 0.3 Bar   |
| Focus       | Active   | Set Capillary         | 4500 V    | Set Dry Heater   | 180 °C    |
| Scan Begin  | 50 m/z   | Set End Plate Offset  | -500 V    | Set Dry Gas      | 4.0 l/min |
| Scan End    | 3000 m/z | Set Collision Cell RF | 600.0 Vpp | Set Divert Valve | Source    |

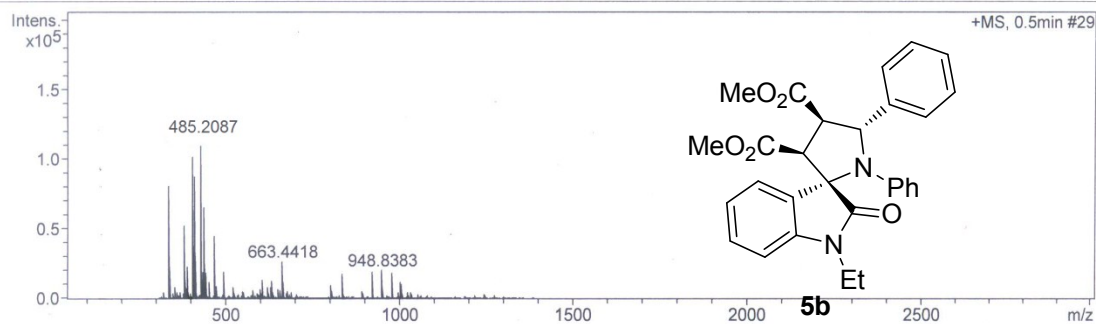

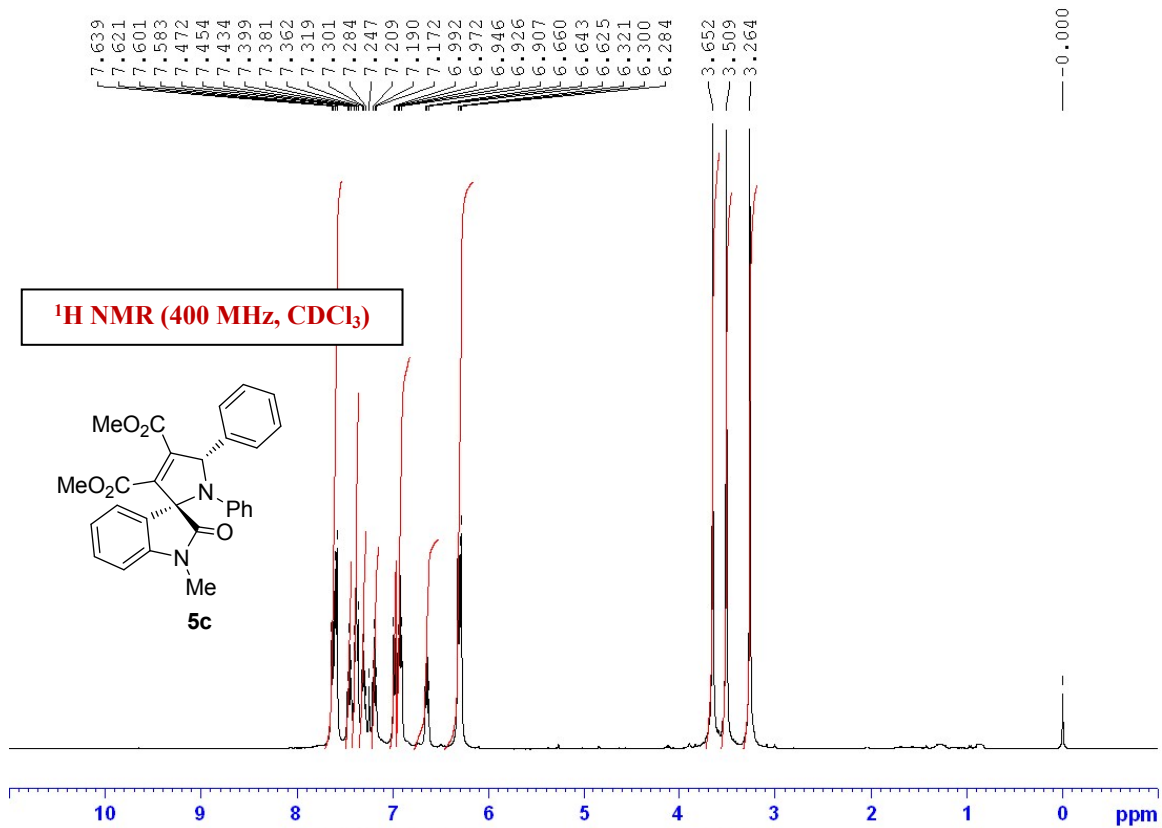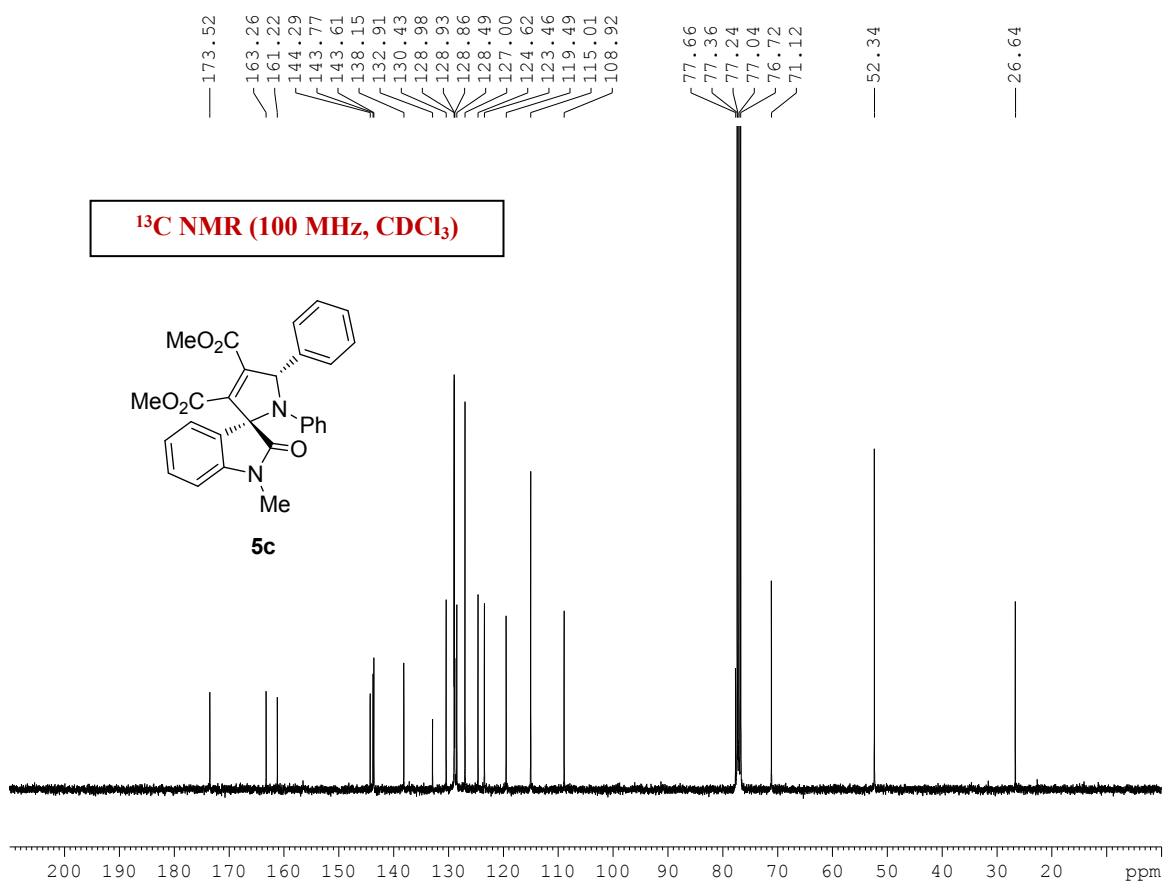

130.46  
129.01  
128.96  
128.52  
127.03  
124.65  
123.49  
119.52  
115.05  
108.95

71.15

52.37

26.67

**<sup>13</sup>C DEPT NMR (100 MHz, CDCl<sub>3</sub>)**

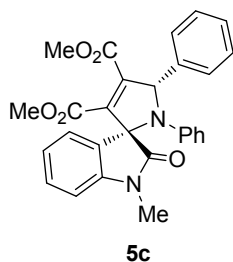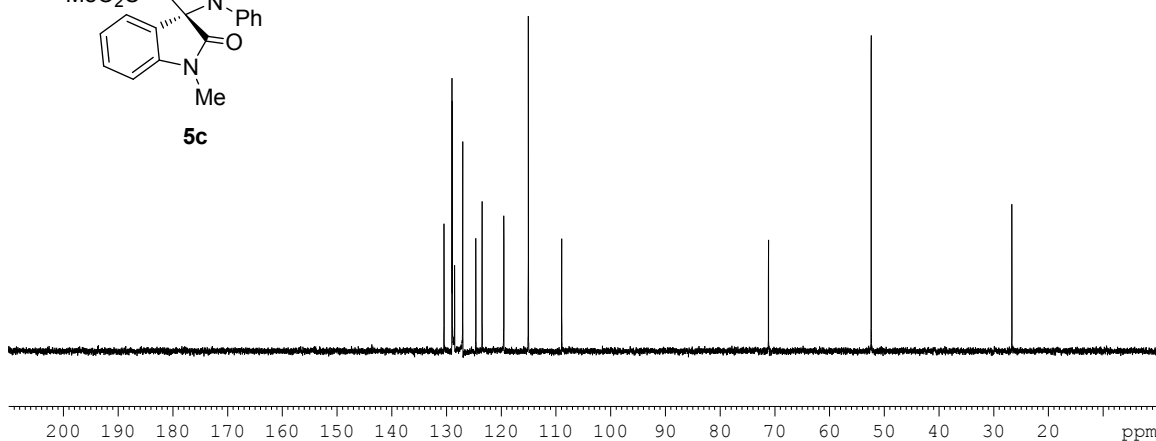

**Acquisition Parameter**

|             |          |                       |           |                  |           |
|-------------|----------|-----------------------|-----------|------------------|-----------|
| Source Type | ESI      | Ion Polarity          | Positive  | Set Nebulizer    | 0.3 Bar   |
| Focus       | Active   | Set Capillary         | 4500 V    | Set Dry Heater   | 180 °C    |
| Scan Begin  | 50 m/z   | Set End Plate Offset  | -500 V    | Set Dry Gas      | 4.0 l/min |
| Scan End    | 3000 m/z | Set Collision Cell RF | 600.0 Vpp | Set Divert Valve | Source    |

0.0 0.2 0.4 0.6 0.8 Time [min]

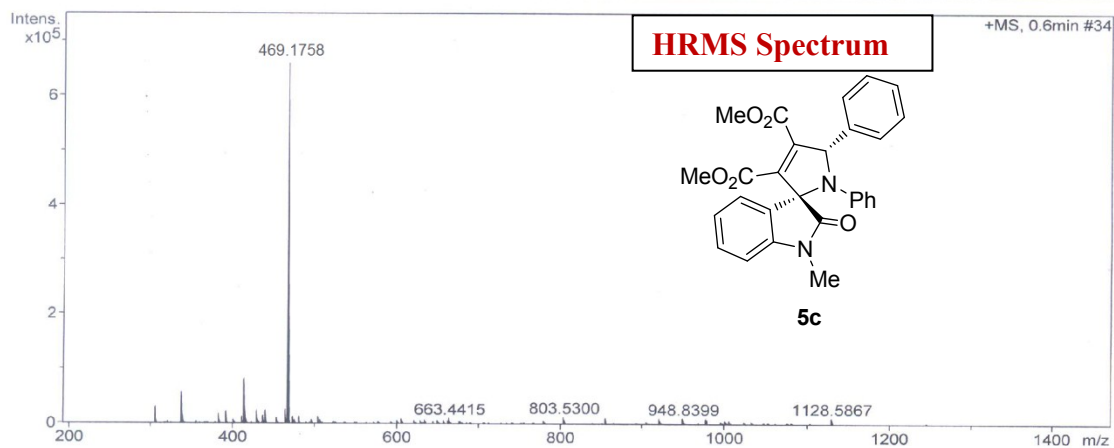

**<sup>1</sup>H NMR (400 MHz, CDCl<sub>3</sub>)**

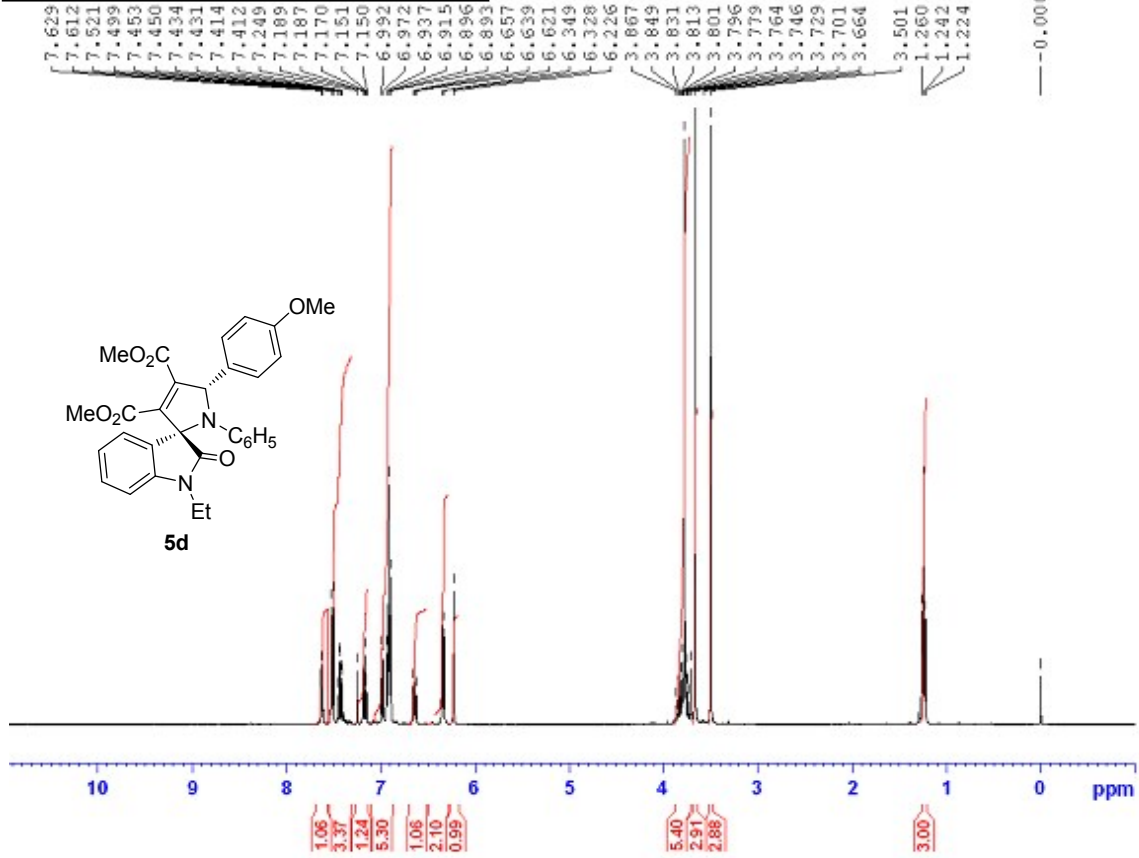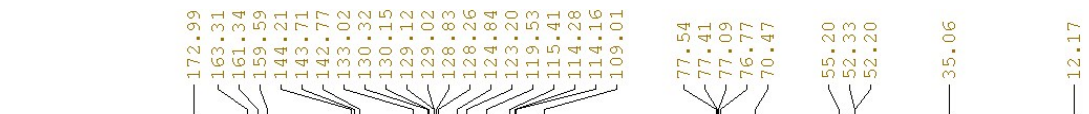

**<sup>13</sup>C NMR (100 MHz, CDCl<sub>3</sub>)**

sgk-101 2/5/2012  
C13CPD CDCl3

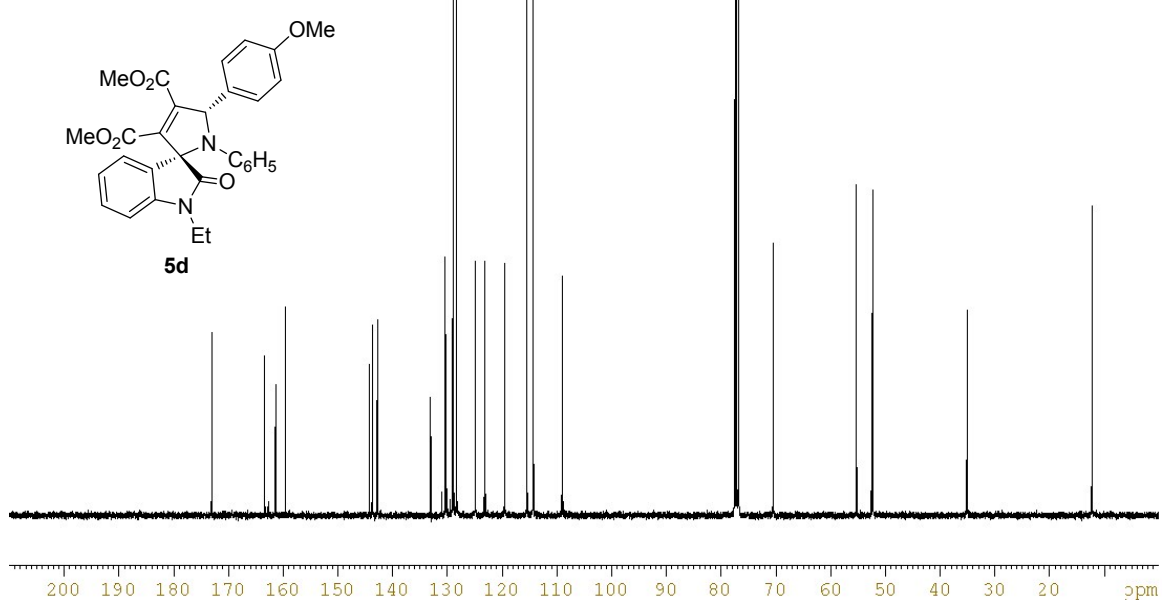

### <sup>13</sup>C DEPT NMR (100 MHz, CDCl<sub>3</sub>)

sgk-101 2/5/2012  
C13DEPT135 CDCl3

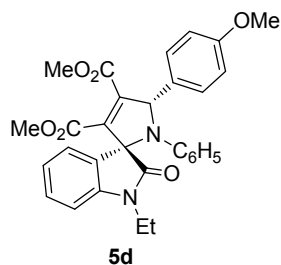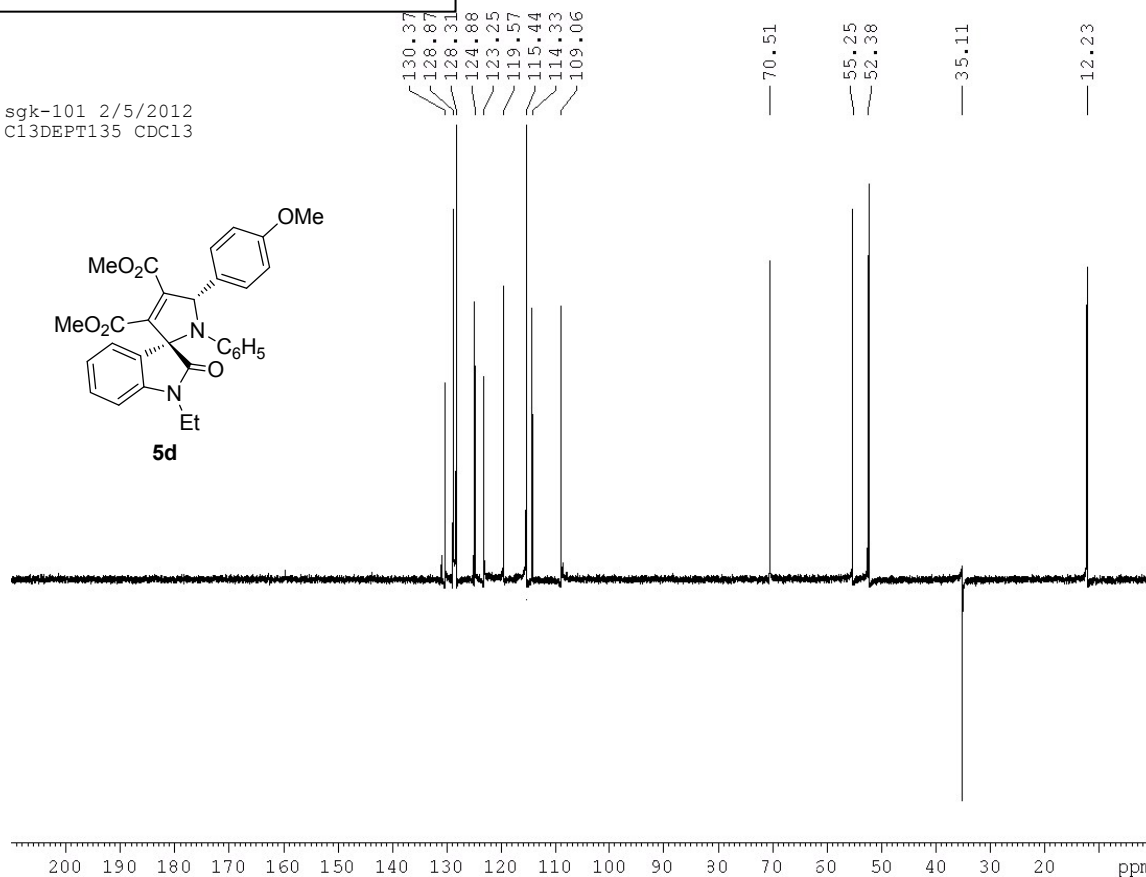

### HRMS Spectrum

#### Acquisition Parameter

|             |            |                       |           |                  |           |
|-------------|------------|-----------------------|-----------|------------------|-----------|
| Source Type | ESI        | Ion Polarity          | Positive  | Set Nebulizer    | 0.3 Bar   |
| Focus       | Not active | Set Capillary         | 4500 V    | Set Dry Heater   | 180 °C    |
| Scan Begin  | 50 m/z     | Set End Plate Offset  | -500 V    | Set Dry Gas      | 4.0 l/min |
| Scan End    | 1500 m/z   | Set Collision Cell RF | 100.0 Vpp | Set Divert Valve | Source    |

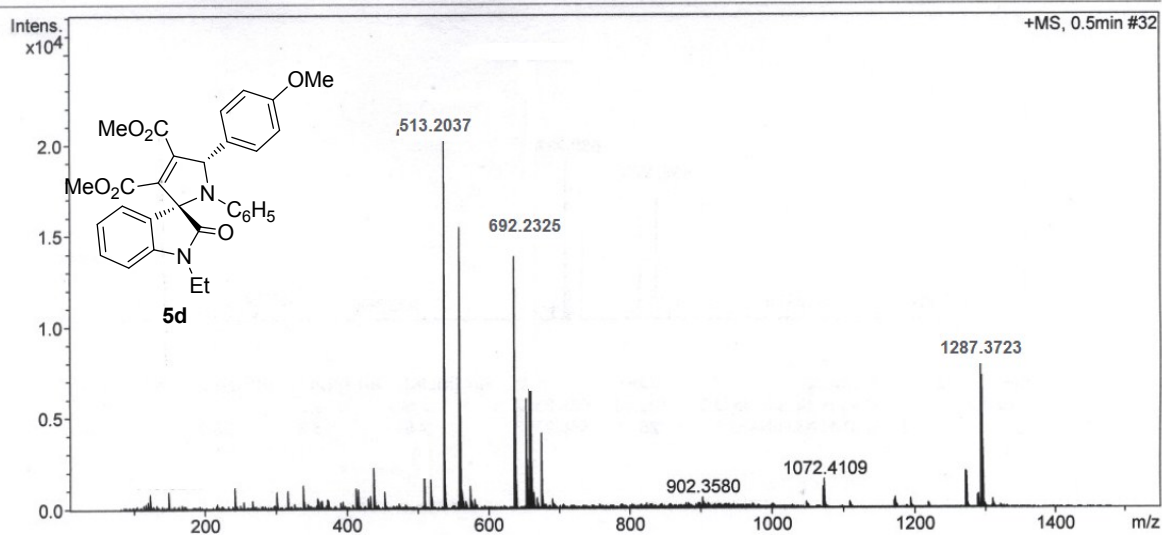

**<sup>1</sup>H NMR (400 MHz, CDCl<sub>3</sub>)**

7.566  
7.565  
7.548  
7.344  
7.341  
7.324  
7.322  
7.305  
7.302  
7.188  
7.170  
7.167  
7.107  
7.106  
7.088  
7.069  
7.068  
7.007  
6.987  
6.967  
6.901  
6.890  
6.882  
6.871  
6.868  
6.850  
6.799  
6.796  
6.779  
6.776  
6.639  
6.598  
6.580  
6.561  
6.375  
6.355  
5.734  
5.717  
5.282  
5.279  
5.239  
5.236  
5.189  
5.186  
5.163  
5.160  
4.320  
4.307  
4.290  
4.275  
3.938  
3.805  
3.623  
3.445

sgk-122  
PROTON CDC13

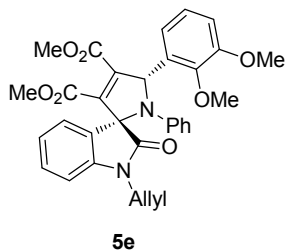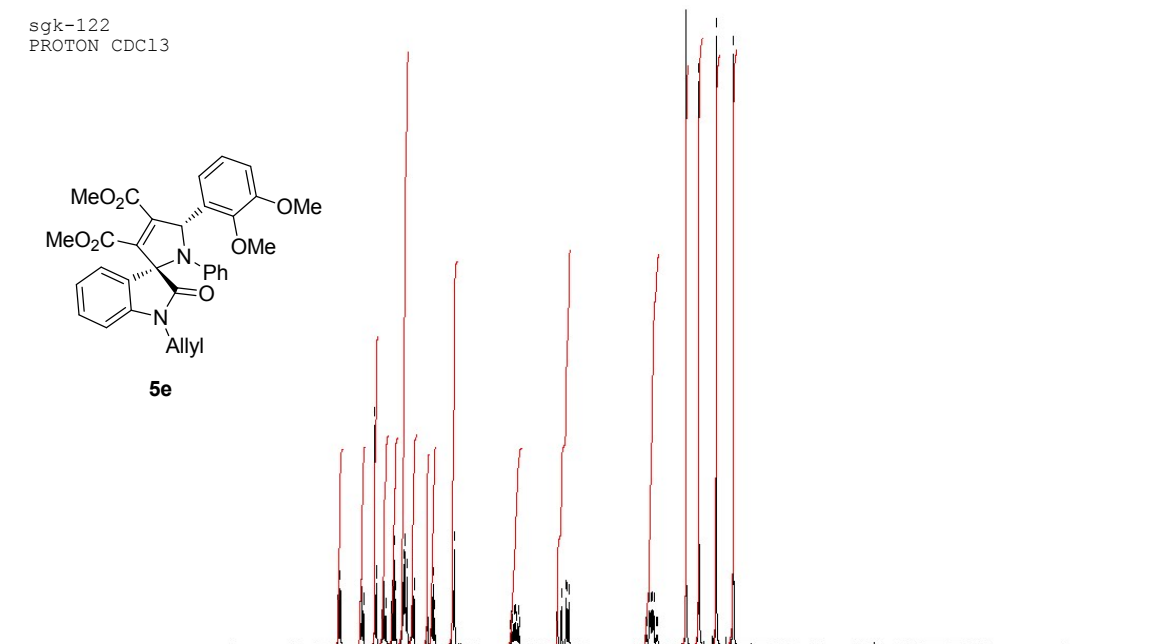

10 9 8 7 6 5 4 3 2 1 0 ppm

175.28  
165.34  
163.30  
154.34  
148.92  
146.64  
145.74  
145.05  
135.00  
133.53  
133.34  
132.10  
131.09  
130.91  
126.67  
126.22  
125.25  
121.64  
121.46  
120.24  
117.45  
114.34  
111.79  
79.36  
79.04  
78.72  
66.30  
62.87  
57.72  
54.34  
54.22  
45.04

sgk-122 2/5/2012  
C13CPD CDC13

**<sup>13</sup>C NMR (100 MHz, CDCl<sub>3</sub>)**

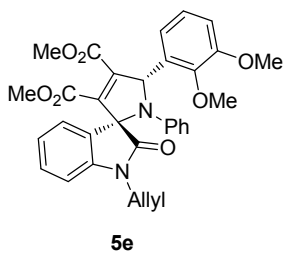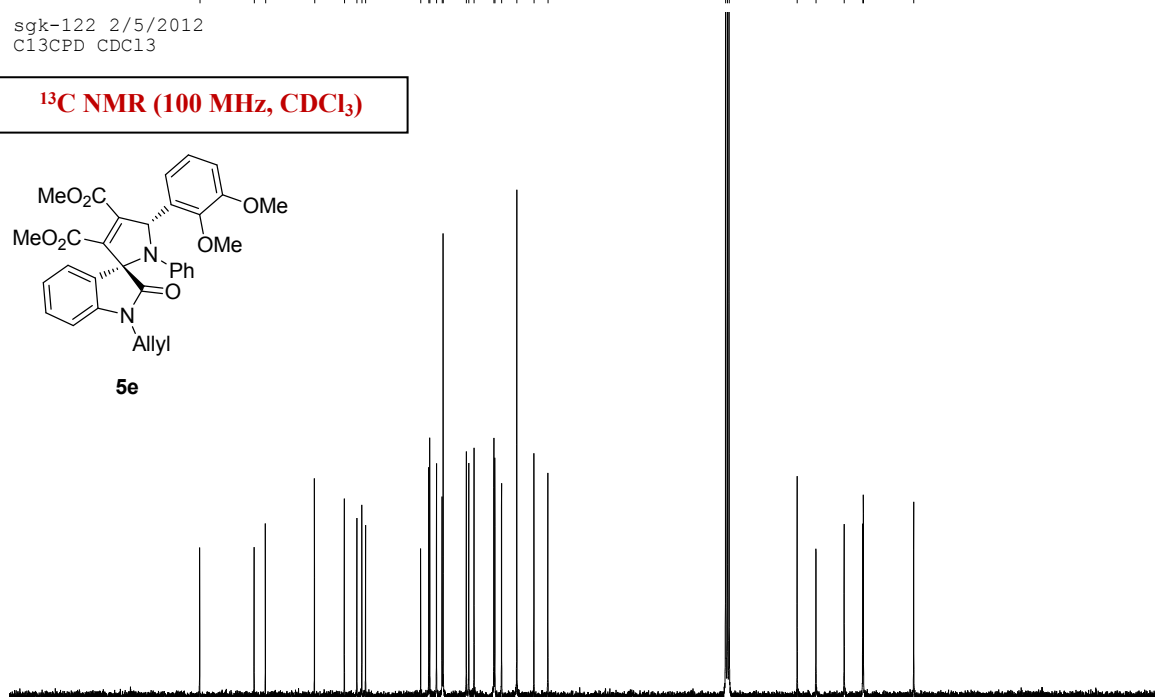

200 190 180 170 160 150 140 130 120 110 100 90 80 70 60 50 40 30 20 ppm

### <sup>13</sup>C DEPT NMR (100 MHz, CDCl<sub>3</sub>)

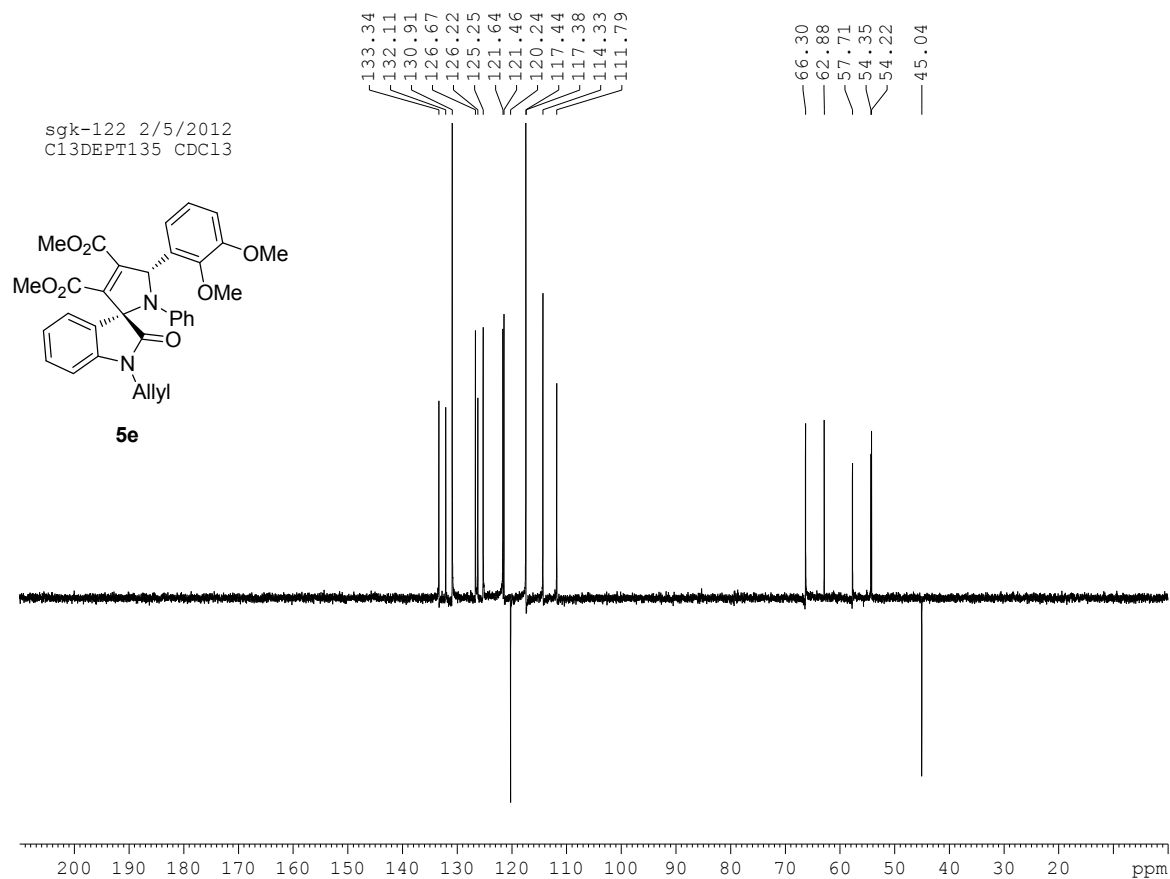

S3 #937 RT: 4.17 AM: 1 NL: 169E8  
T: FTMS+pESI Full ms [100.00-1000.00]

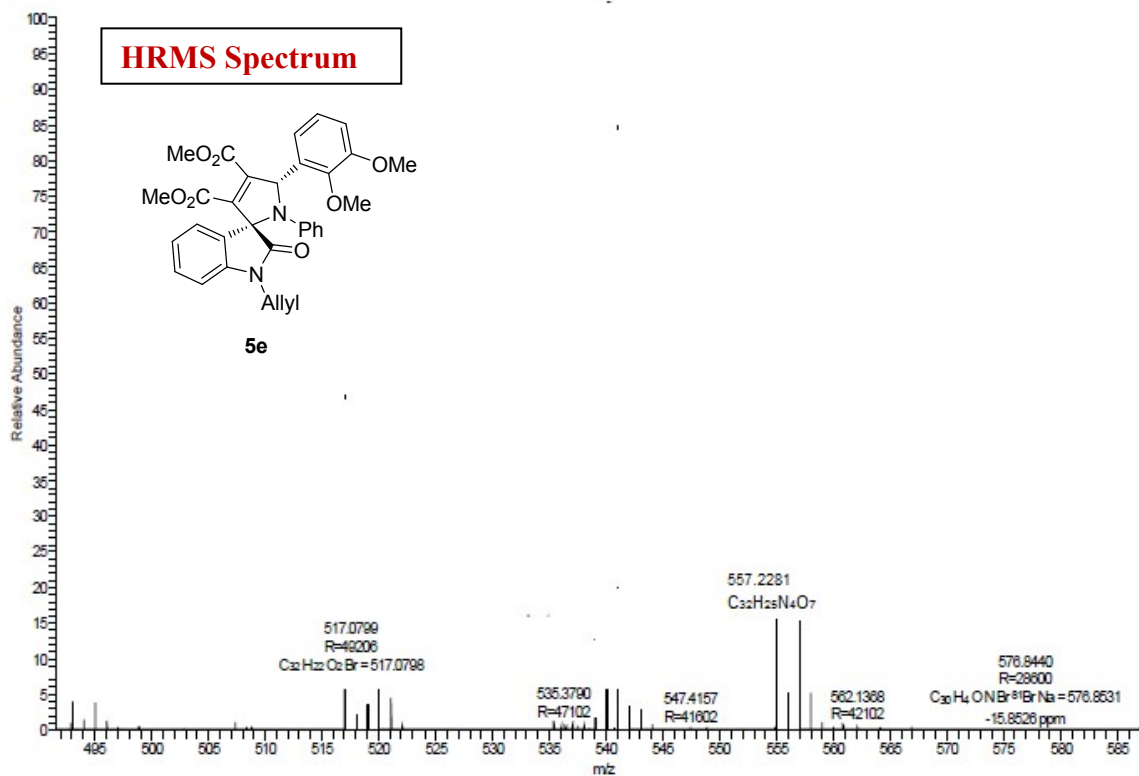

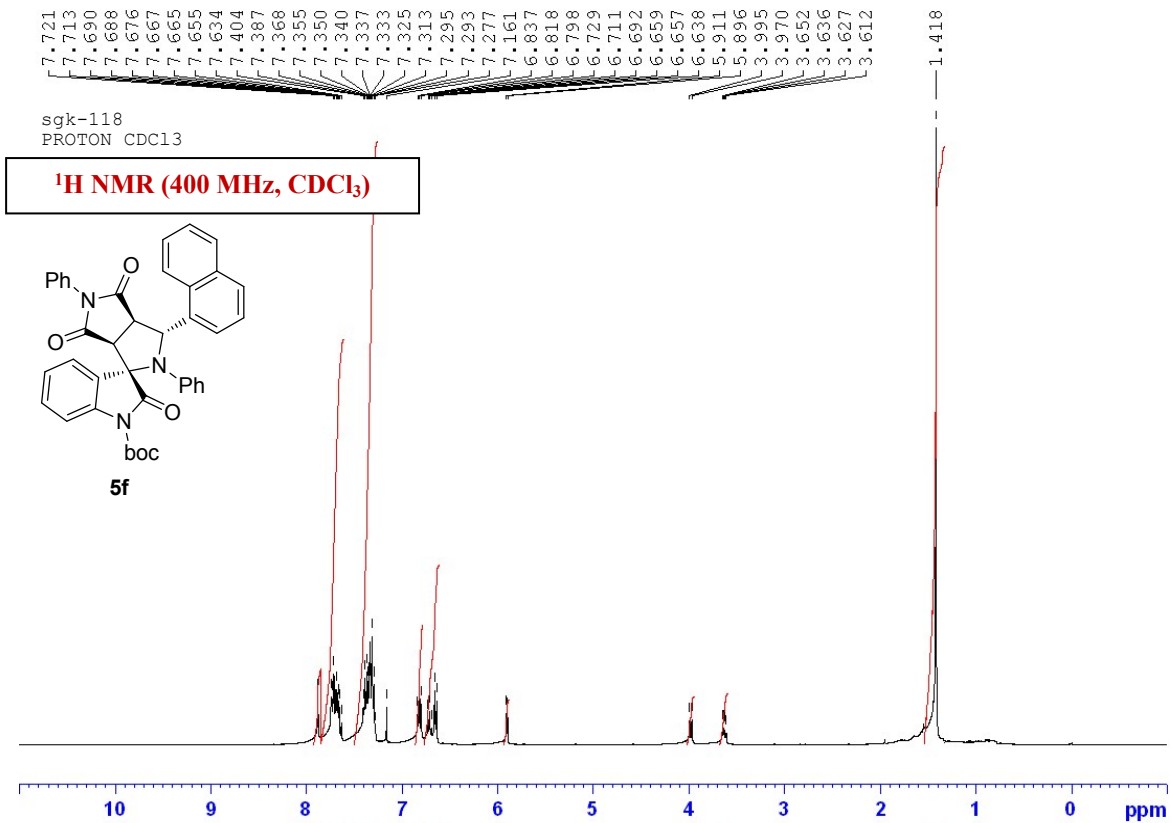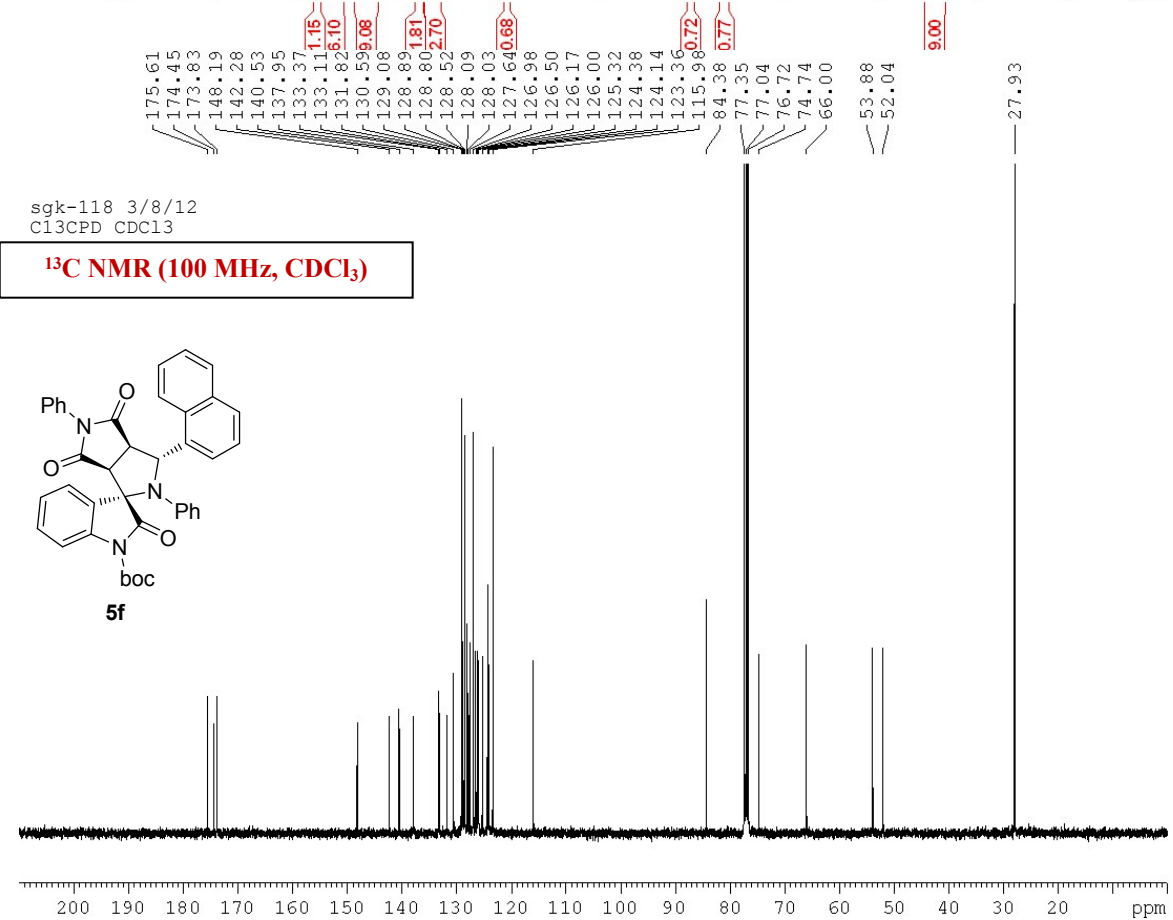



sgk-118 3/8/12  
C13DEPT135 CDC13

130.64  
129.13  
128.94  
128.86  
128.57  
128.08  
127.69  
127.03  
126.55  
126.22  
126.05  
125.37  
124.42  
124.20  
123.41  
116.03

66.04

53.92  
52.08

27.98

### **<sup>13</sup>C DEPT NMR (100 MHz, CDCl<sub>3</sub>)**

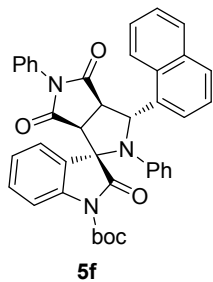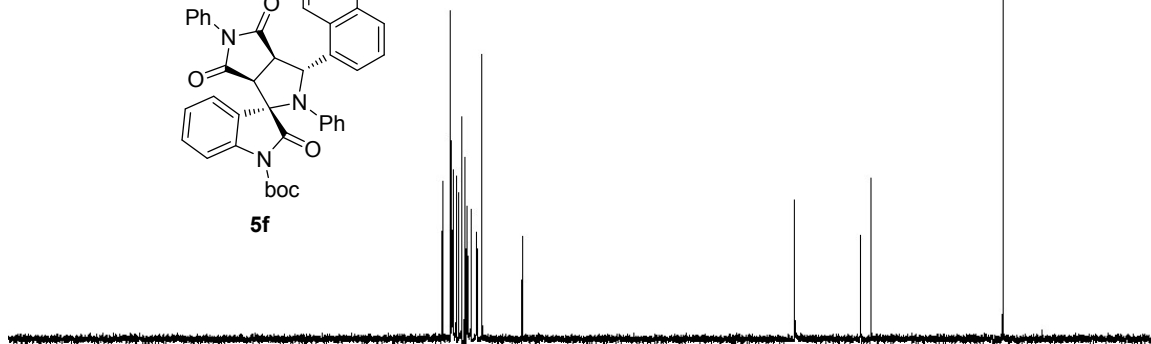

200 190 180 170 160 150 140 130 120 110 90 30 70 60 50 40 30 20 ppm

### **HRMS Spectrum**

| Sample Name   | SANKALAN | Position    | Vial 38             | Instrument Name | Instrument 1 | User Name              |
|---------------|----------|-------------|---------------------|-----------------|--------------|------------------------|
| Inj Vol       | 1        | InjPosition |                     | SampleType      | Sample       | IRM Calibration Status |
| Data Filename | RS-109.d | ACQ Method  | ISOCRATIC_GENERAL.m | Comment         |              | Acquired Time          |

x10<sup>4</sup> +ESI Scan (0.197-0.296 min, 7 Scans) Frag=125.0V RS-109.d Subtract  
658.2320

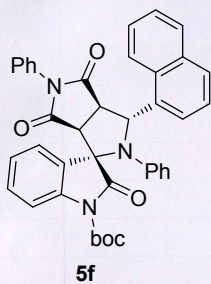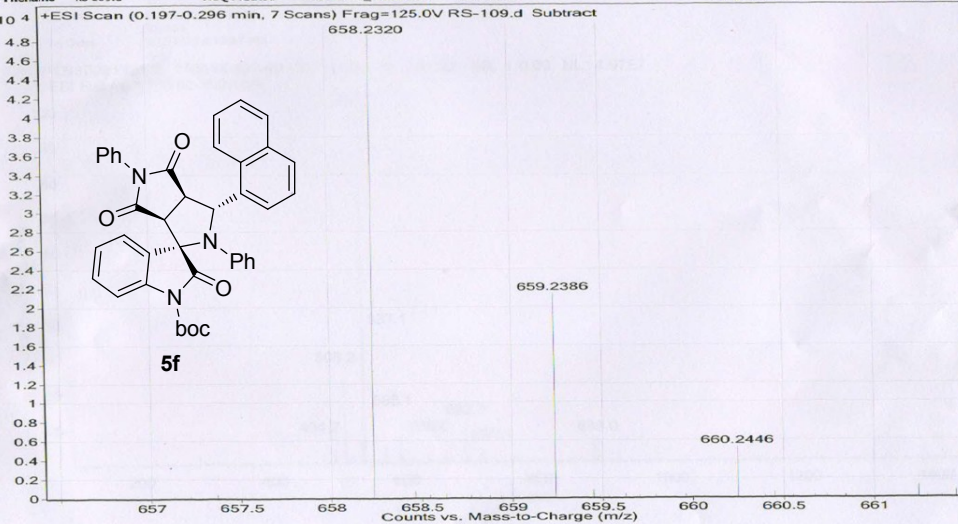

### <sup>1</sup>H NMR (400 MHz, CDCl<sub>3</sub>)

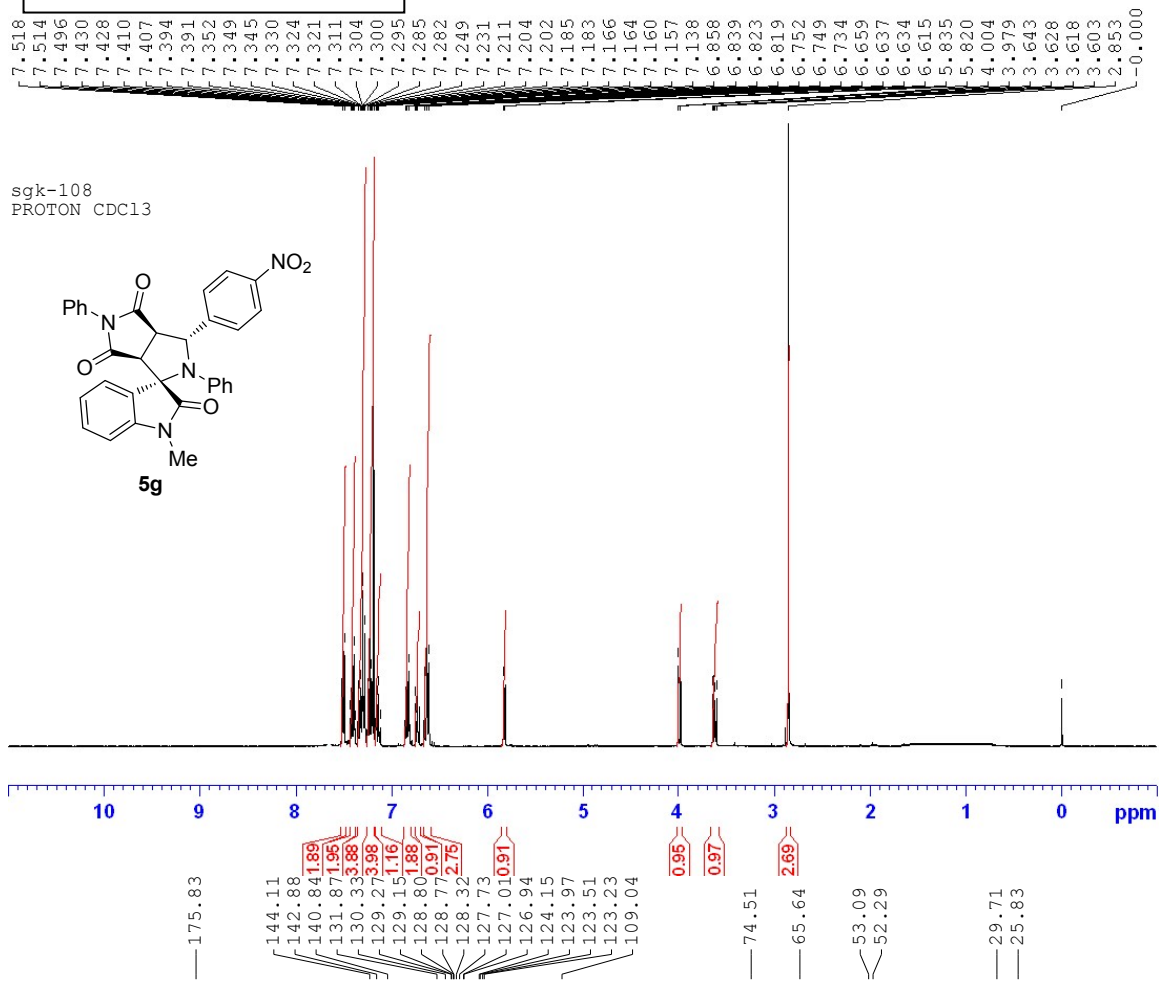

### <sup>13</sup>C NMR (100 MHz, CDCl<sub>3</sub>)

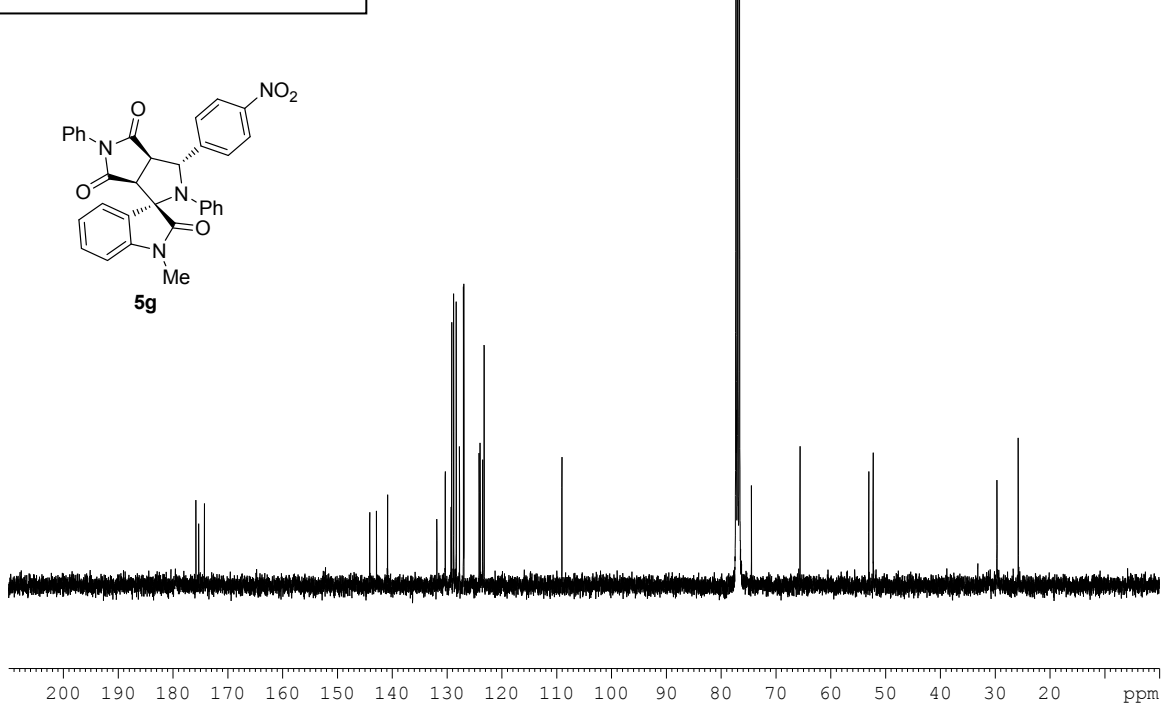

**<sup>13</sup>C DEPT NMR (100 MHz, CDCl<sub>3</sub>)**

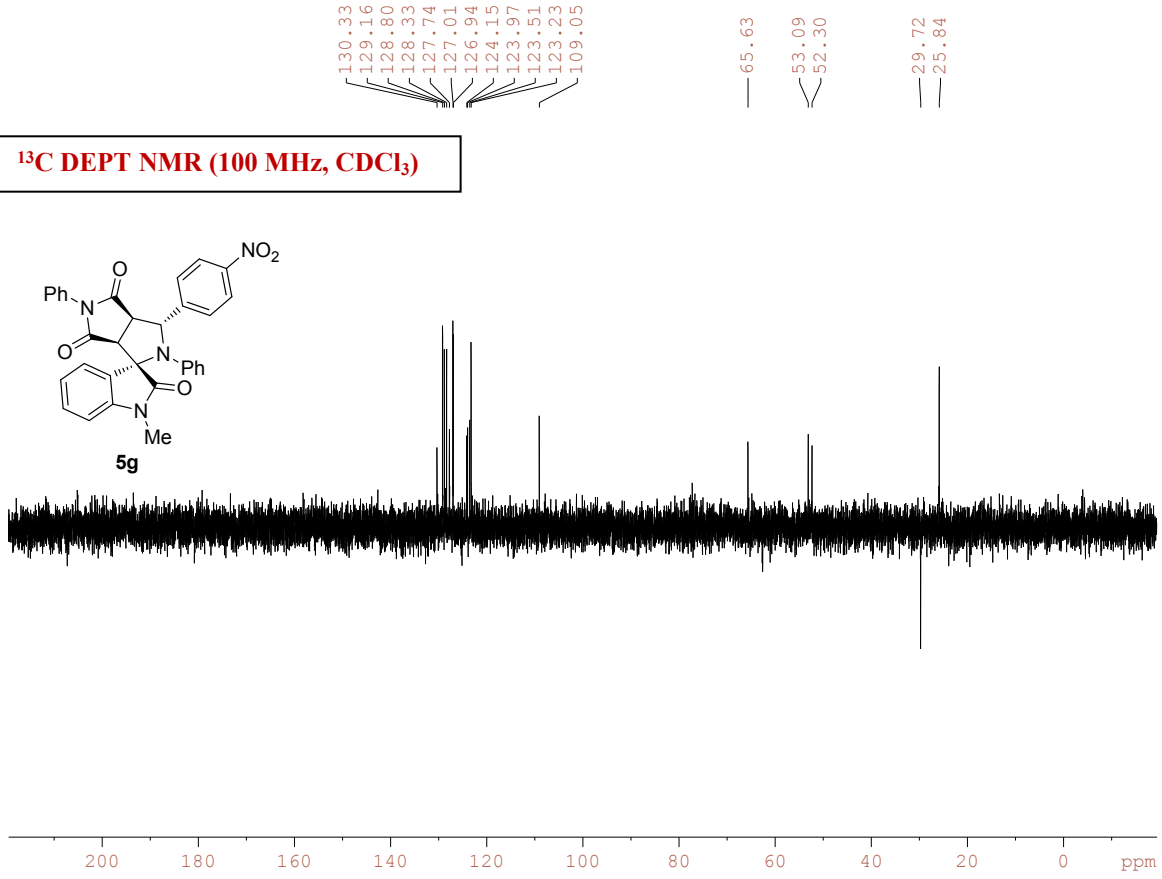

S3#937 RT: 4.17 AM: 1 NL: 1.69EB  
T: FTMS+p ESI Full ms [100.00-1000.00]

**HRMS Spectrum**

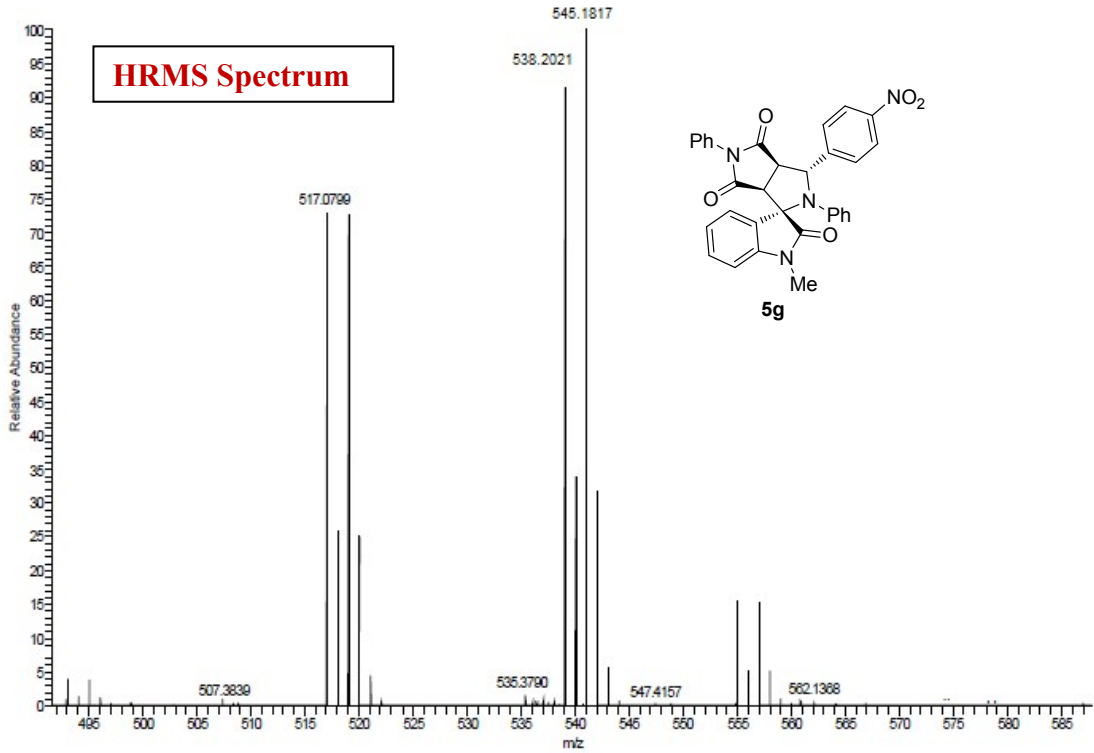

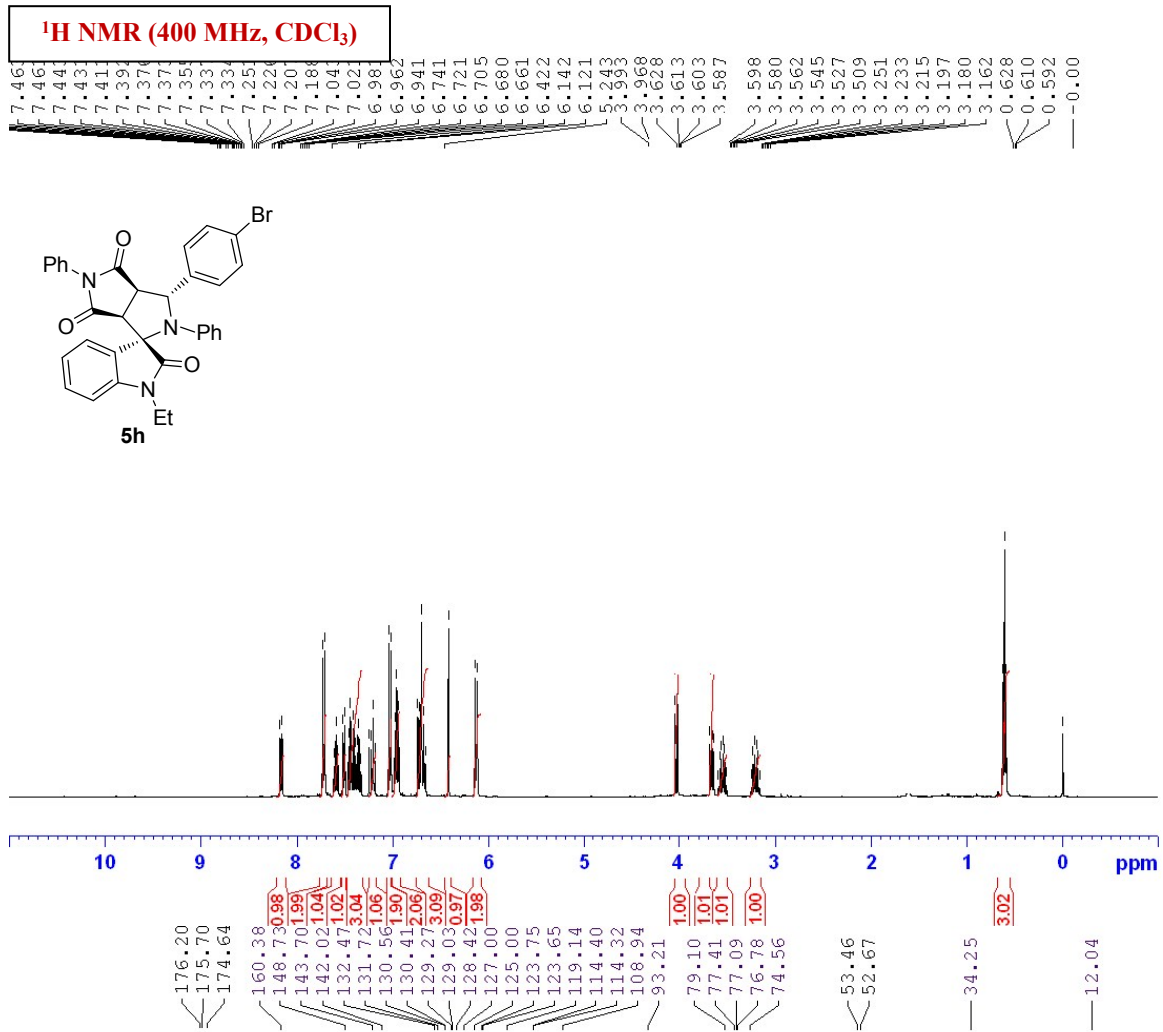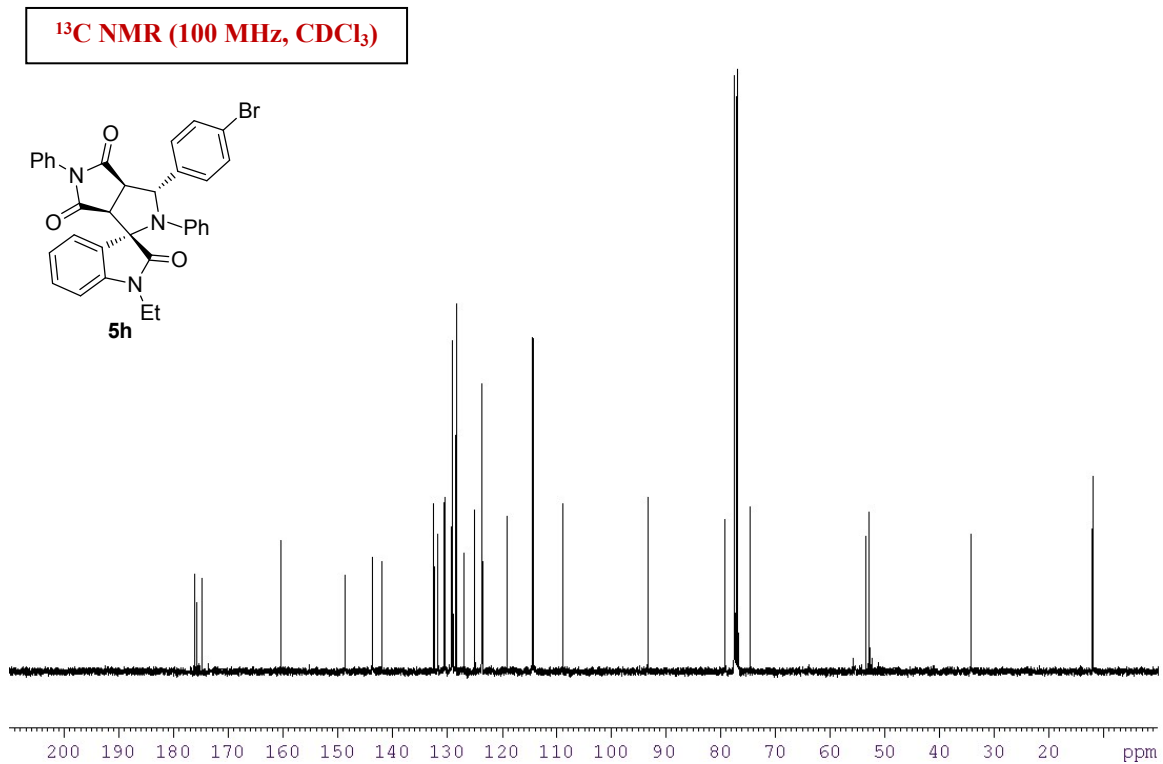

### <sup>13</sup>C DEPT NMR (100 MHz, CDCl<sub>3</sub>)

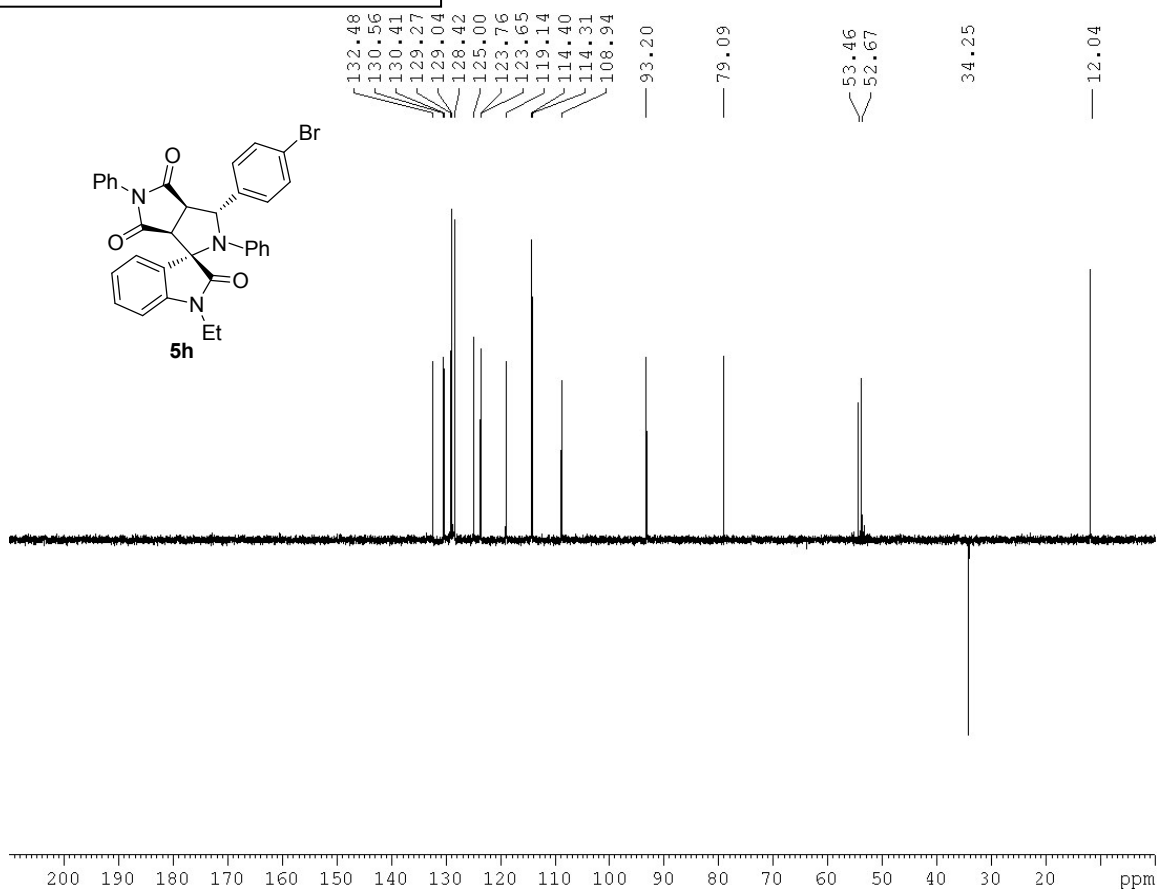

### HRMS Spectrum

C:\xcalibur\...FEB-2014\SMGK-299

25-02-2014 11:29:36

SMGK-299 #63 RT: 0.94 AV: 1 NL: 1.00E6  
T: FTMS (1,1) + p ESI Full lock ms [100.00-2000.00]

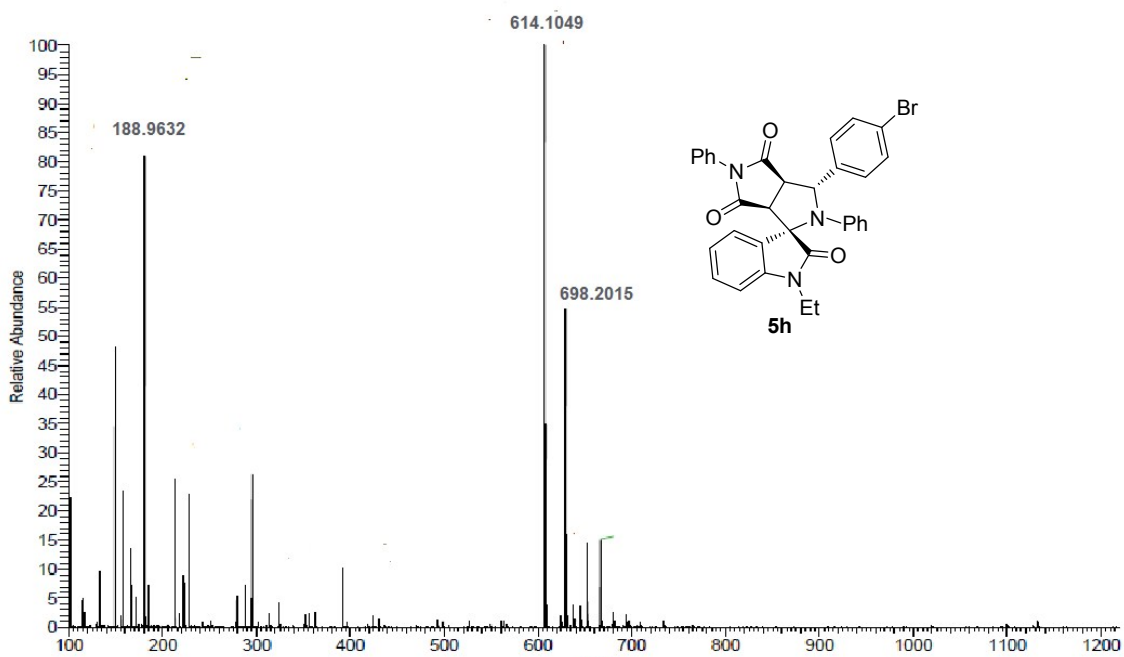

**<sup>1</sup>H NMR (400 MHz, CDCl<sub>3</sub>)**

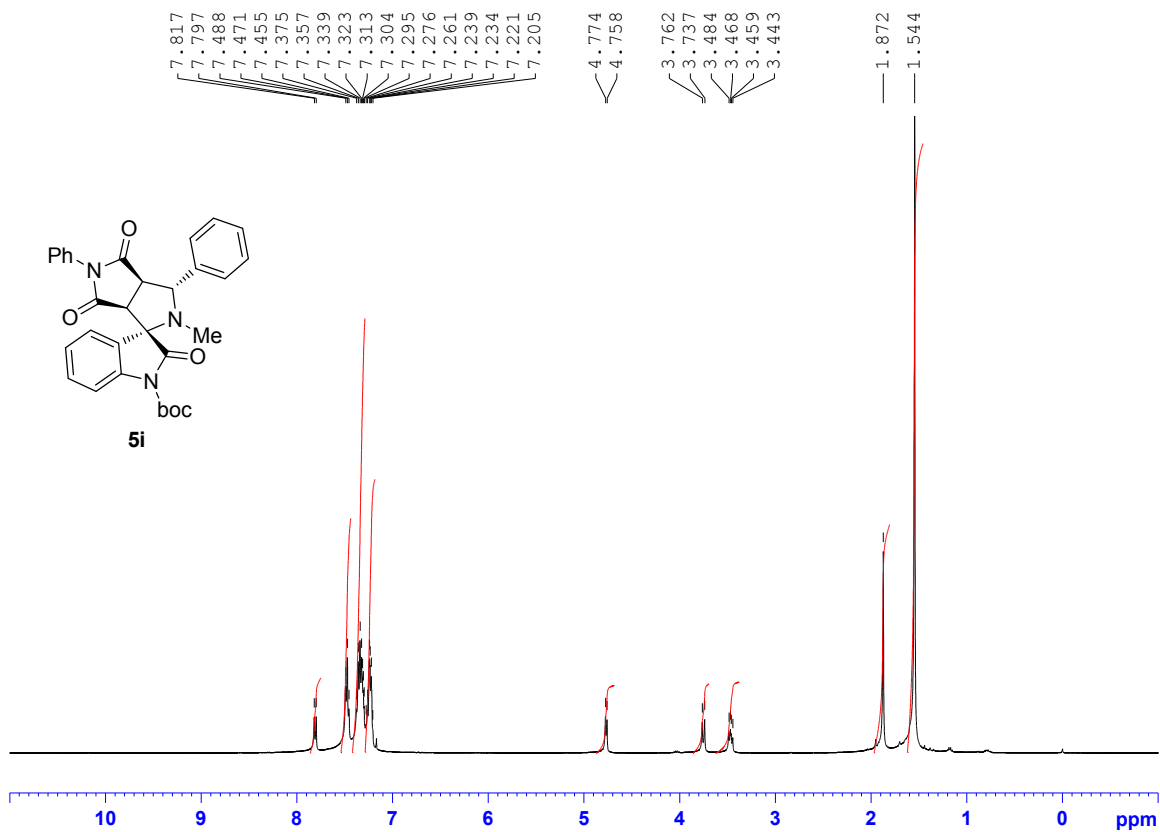

**<sup>13</sup>C NMR (100 MHz, CDCl<sub>3</sub>)**

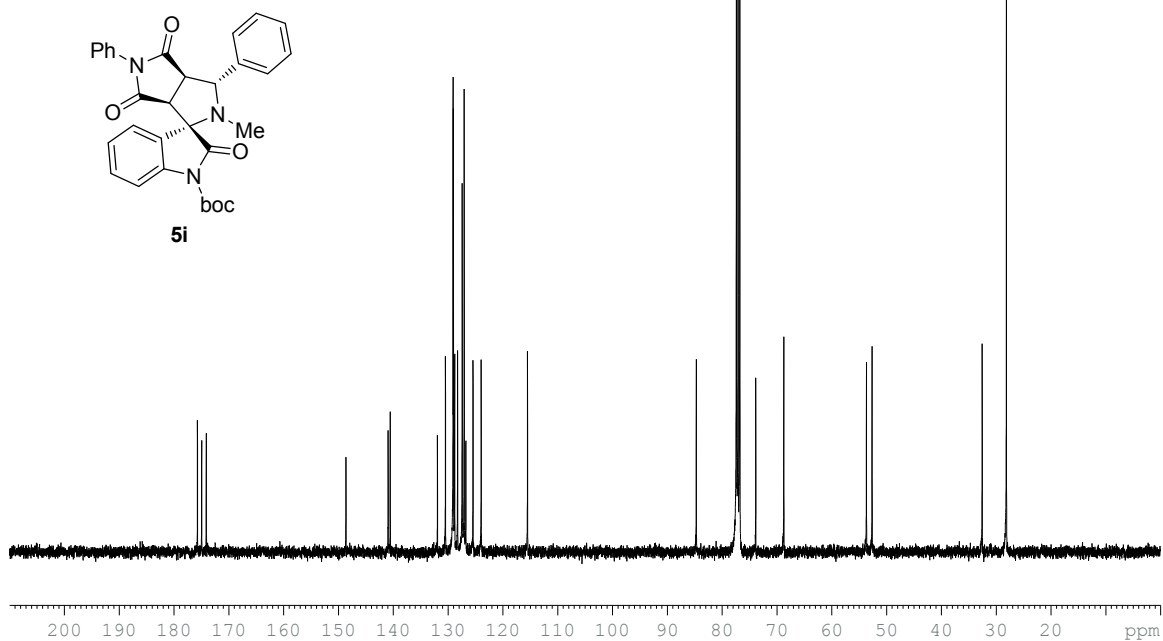

### <sup>13</sup>C DEPT NMR (100 MHz, CDCl<sub>3</sub>)

sgk-115  
C13DEPT135 CDCl3

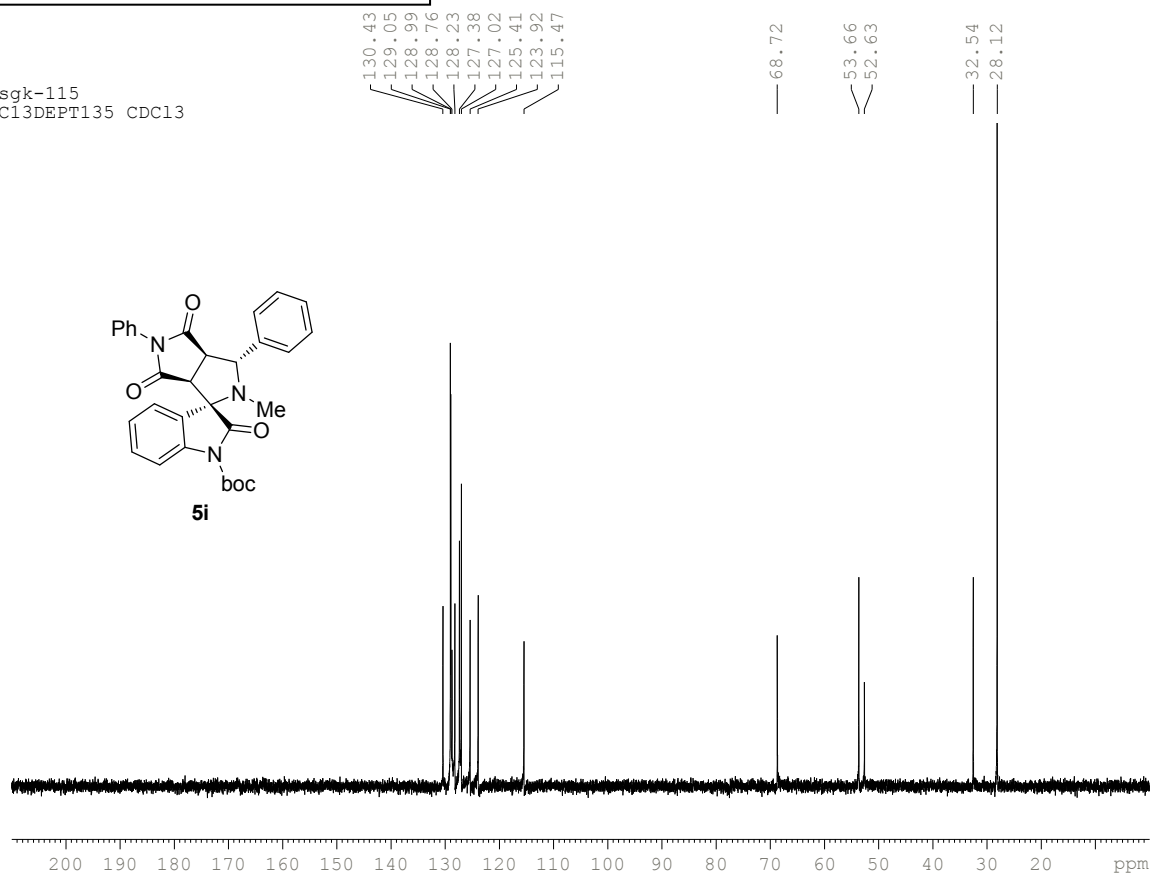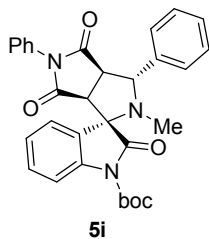

### HRMS Spectrum

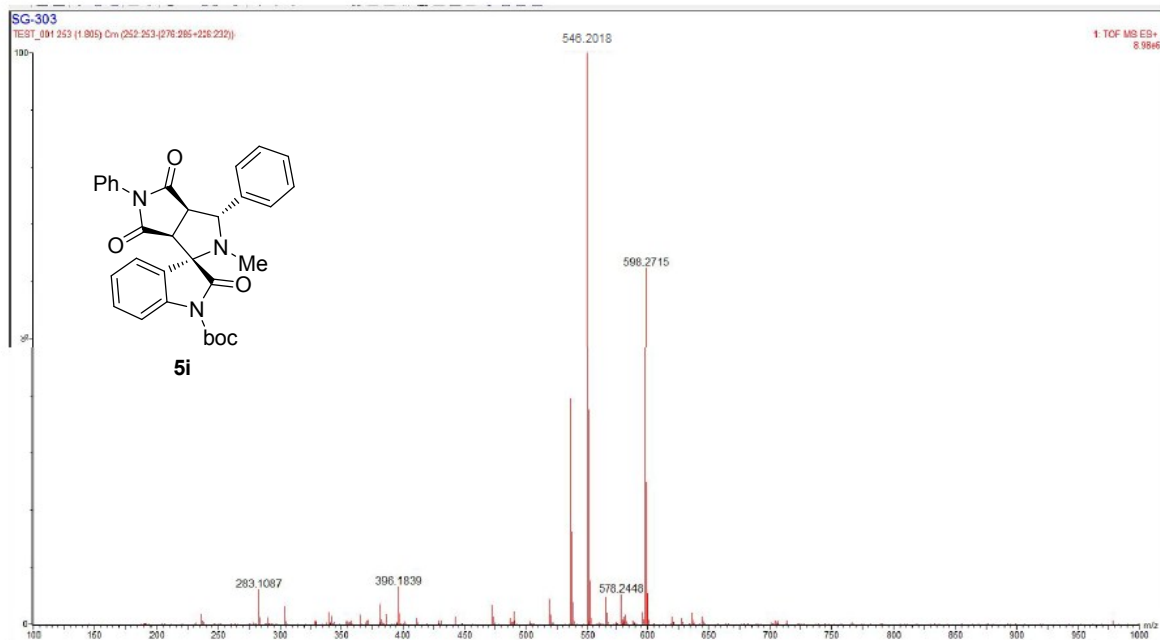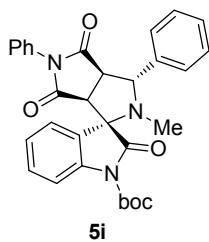

**<sup>1</sup>H NMR (400 MHz, CDCl<sub>3</sub>)**

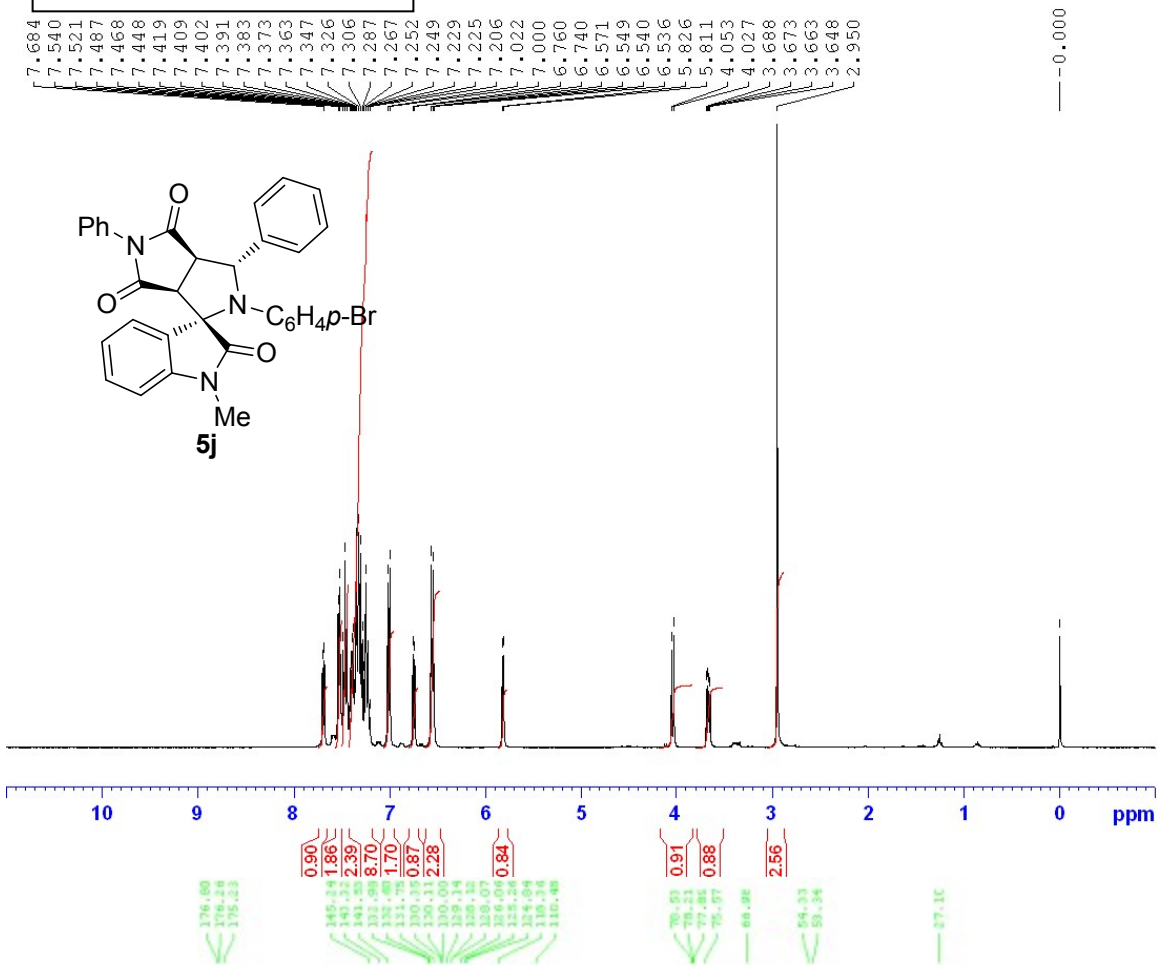

**<sup>13</sup>C NMR (100 MHz, CDCl<sub>3</sub>)**

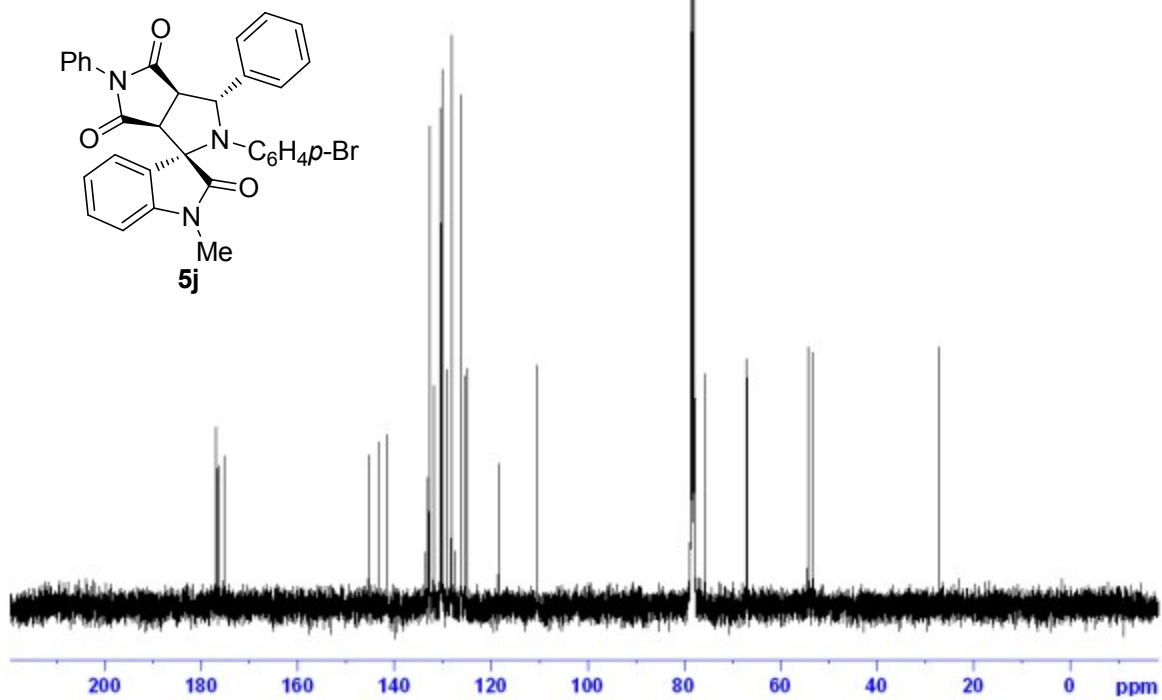



**<sup>13</sup>C DEPT NMR (100 MHz, CDCl<sub>3</sub>)**

132.34  
131.45  
130.59  
129.19  
128.95  
128.84  
127.98  
126.97  
126.91  
124.90  
124.11  
123.68  
109.32

65.81

53.16  
52.18

29.72  
25.95

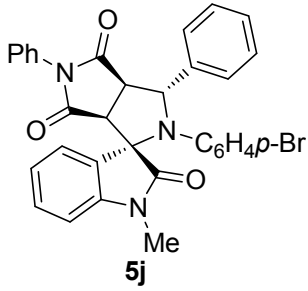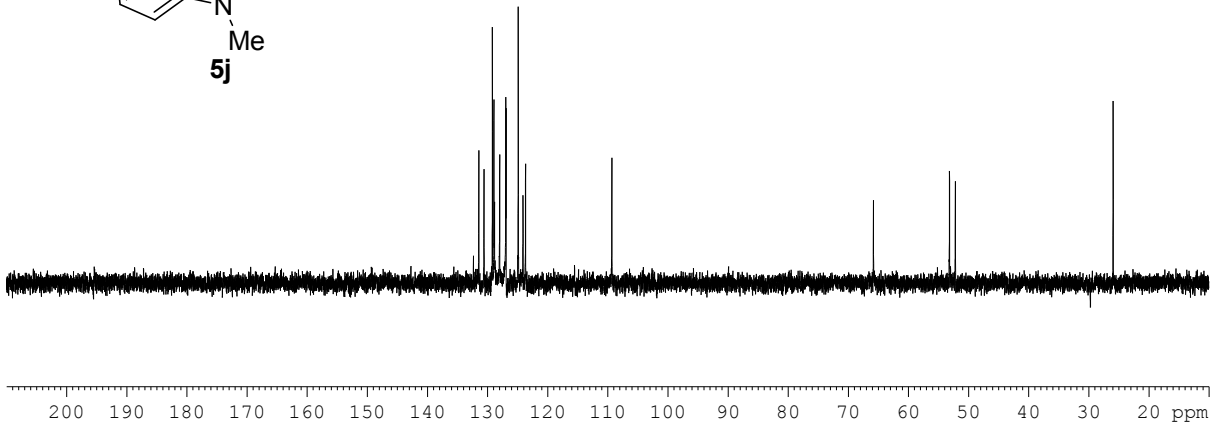

S4#457 RT: 2.03 AV: 1 NL: 2.96E8  
T: FTMS+pESI Full ms [100.00-1000.00]

**HRMS Spectrum**

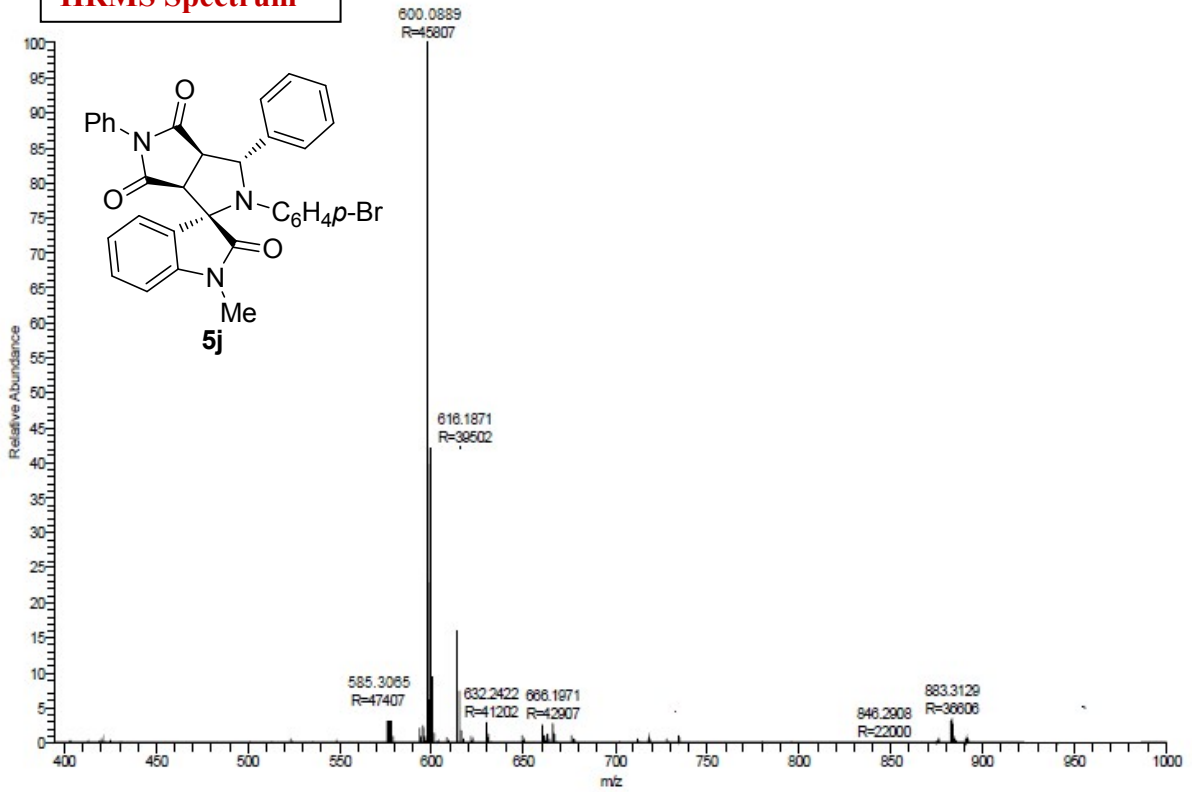

**<sup>1</sup>H NMR (400 MHz, CDCl<sub>3</sub>)**

sgk-307  
PROTON CDCl<sub>3</sub>

7.779, 7.758, 7.628, 7.608, 7.589, 7.532, 7.336, 7.317, 7.298, 7.251, 7.231, 7.144, 7.121, 7.108, 7.090, 6.406, 4.188, 4.170, 4.161, 4.145, 4.126, 2.670, 2.595, 2.575, 2.554, 2.470, 2.457, 2.439, 2.259, 2.246, 2.236, 2.223, 1.883, 1.618, 1.600, 1.582, 0.121

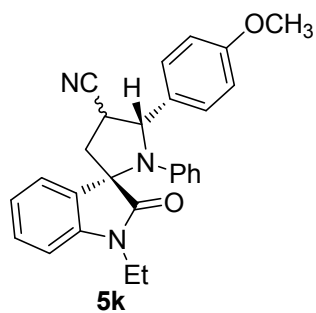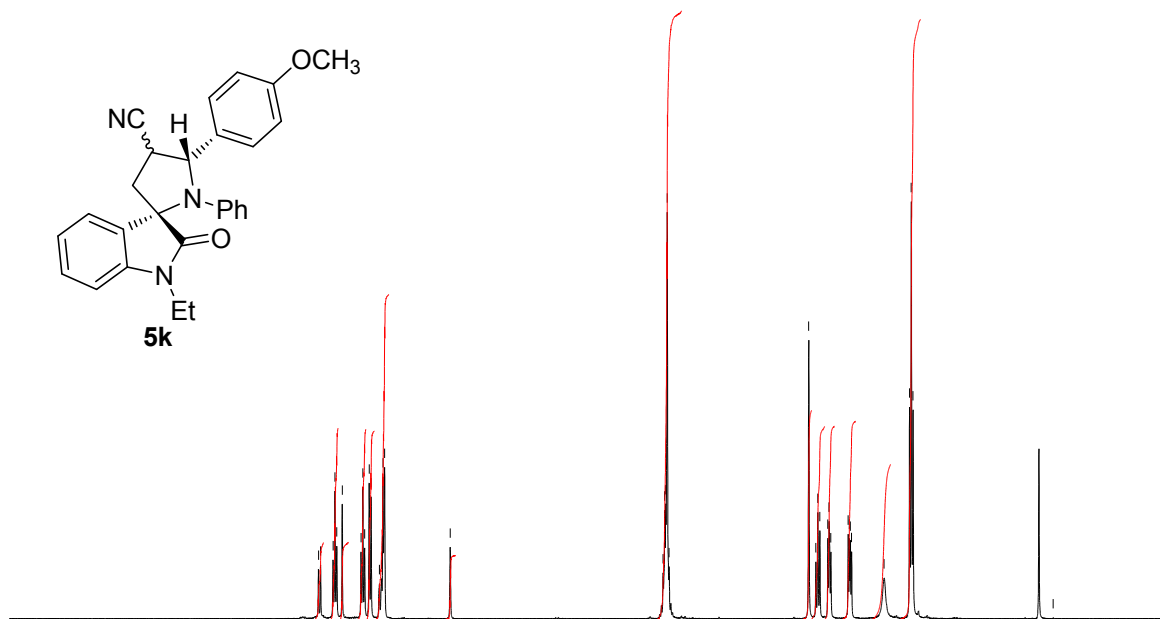

10 9 8 7 6 5 4 3 2 1 0 ppm

171.06, 162.70, 155.35, 152.58, 143.23, 128.79, 126.29, 125.55, 122.33, 119.02, 115.91, 112.32, 111.99, 108.88, 100.89, 77.36, 77.05, 76.73, 55.77, 35.42, 31.80, 21.21, 18.69, 15.12, 12.82

**<sup>13</sup>C NMR (100 MHz, CDCl<sub>3</sub>)**

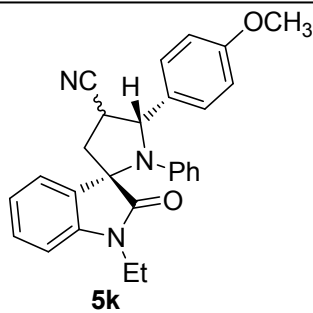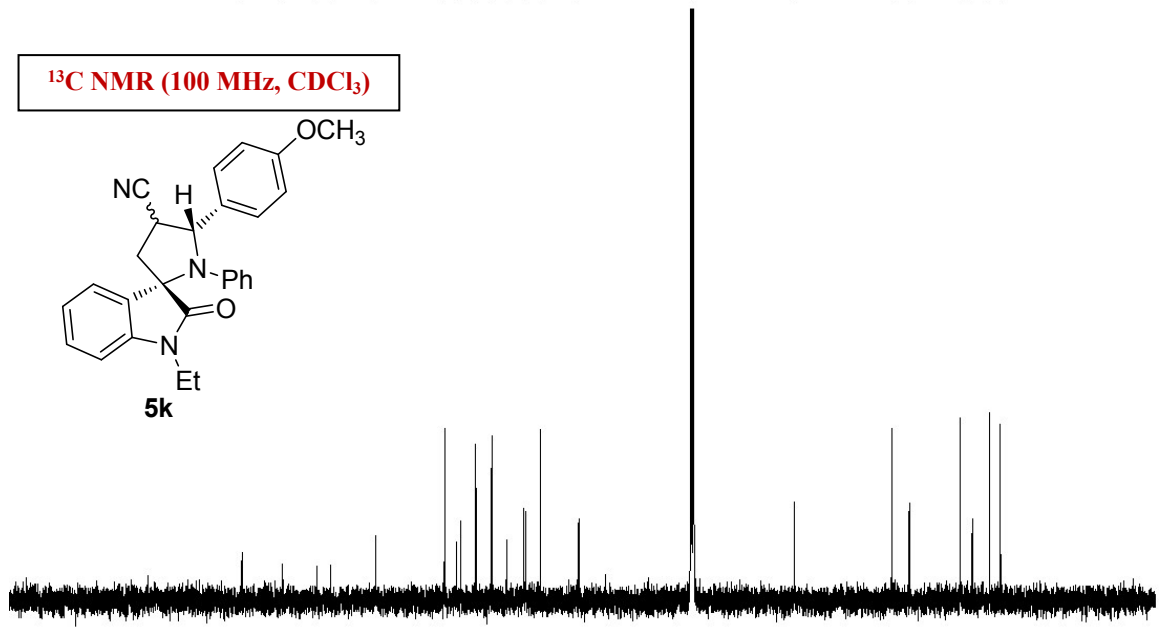

200 180 160 140 120 100 80 60 40 20 0 ppm

## HRMS Spectrum

### Acquisition Parameter

|             |          |                       |           |                  |           |
|-------------|----------|-----------------------|-----------|------------------|-----------|
| Source Type | ESI      | Ion Polarity          | Positive  | Set Nebulizer    | 0.3 Bar   |
| Focus       | Active   | Set Capillary         | 4500 V    | Set Dry Heater   | 180 °C    |
| Scan Begin  | 50 m/z   | Set End Plate Offset  | -500 V    | Set Dry Gas      | 4.0 l/min |
| Scan End    | 3000 m/z | Set Collision Cell RF | 600.0 Vpp | Set Divert Valve | Source    |

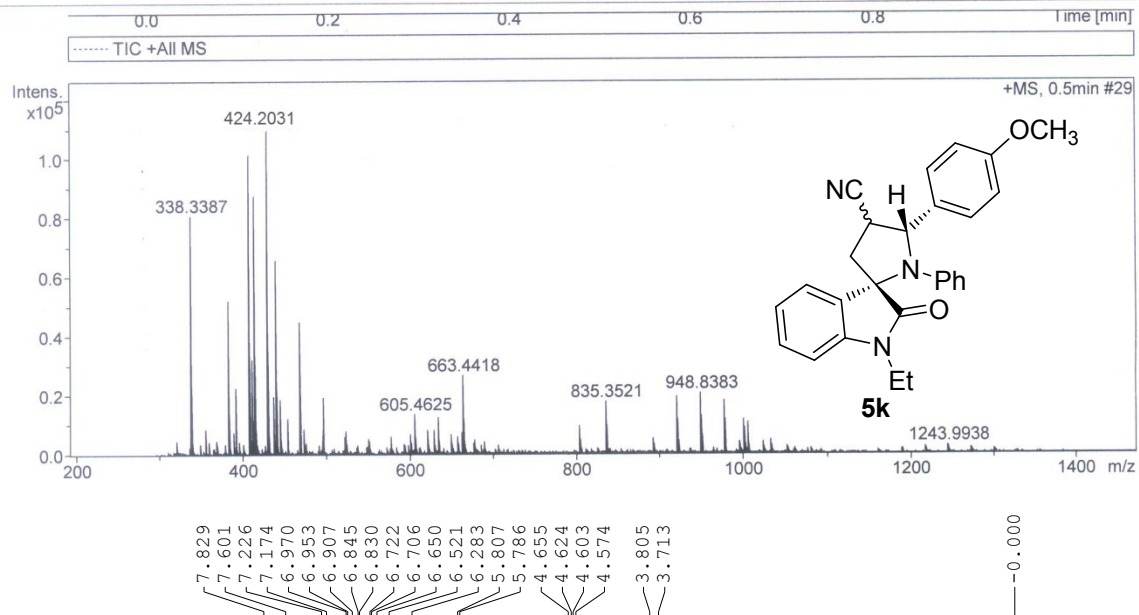

## <sup>1</sup>H NMR (400 MHz, CDCl<sub>3</sub>)

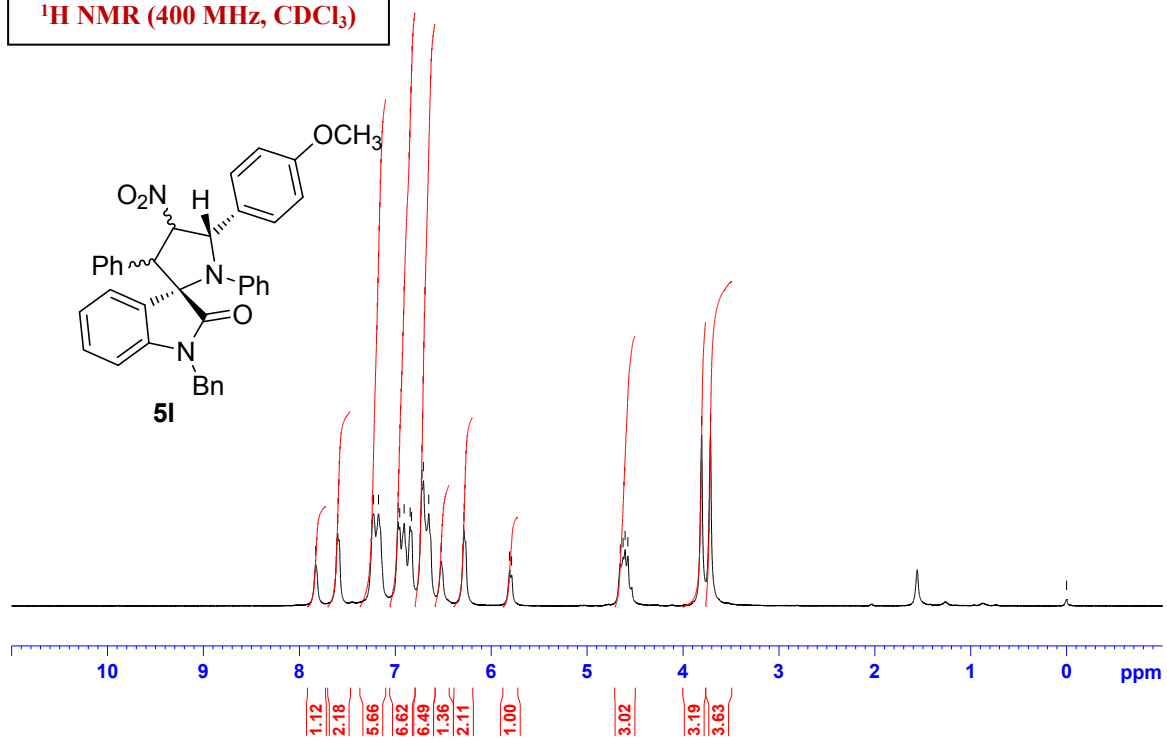

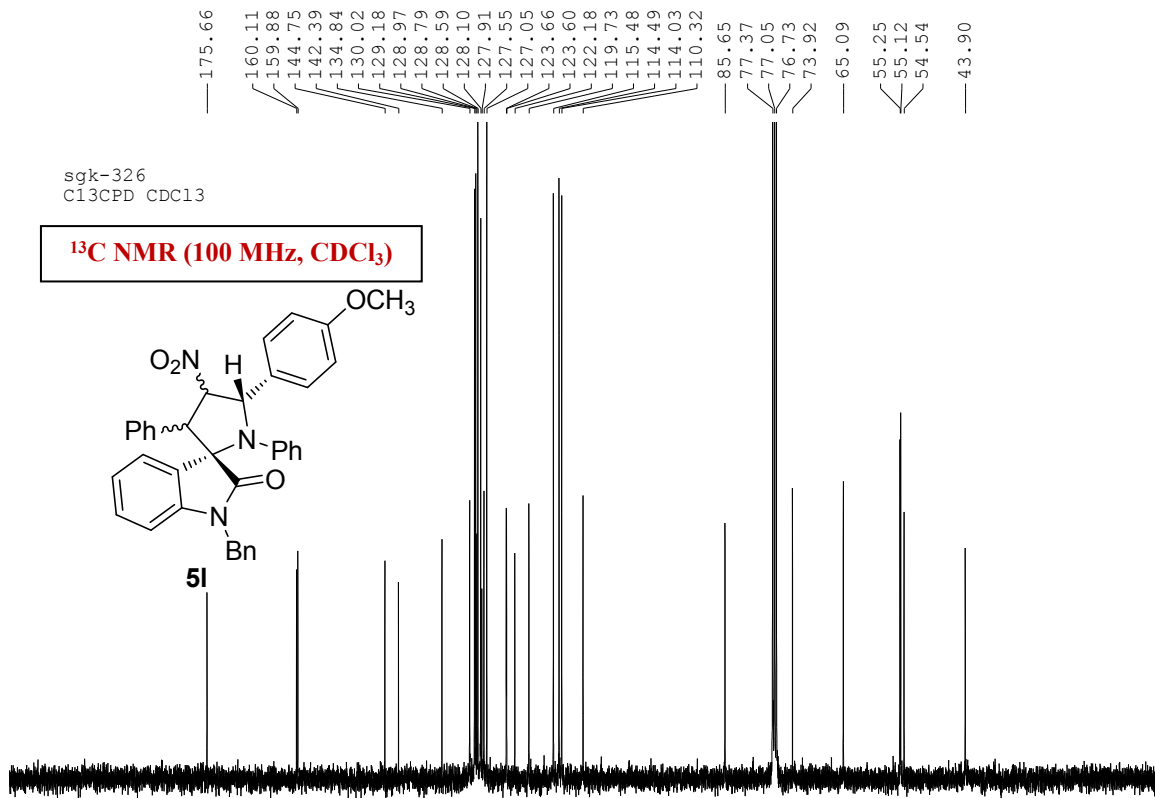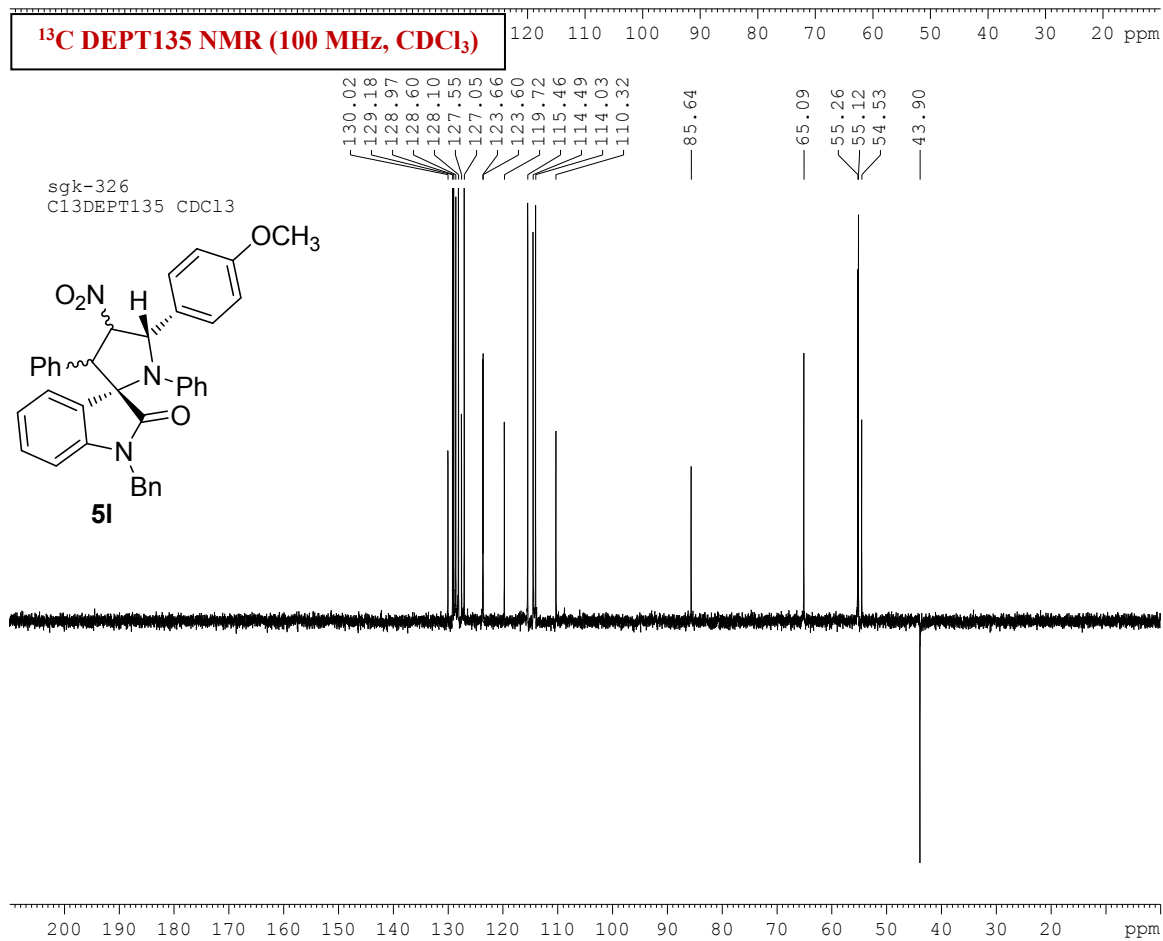

# HRMS Spectrum

S4#467 RT: 2.03 A1: 1 NL: 2.96E8  
T: FTMS+pESI Full ms [100.00-1000.00]

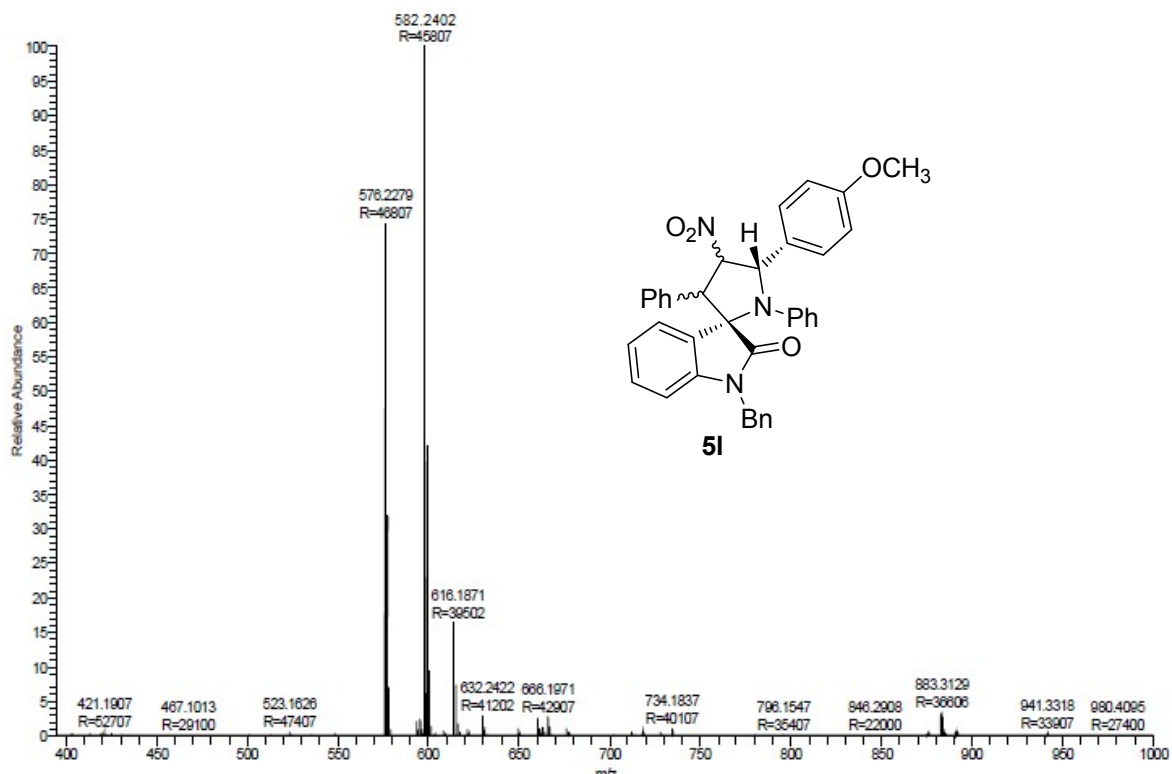

# 1H, 13C, DEPT135 NMR and HRMS spectra of spiroindoloimidazolidines

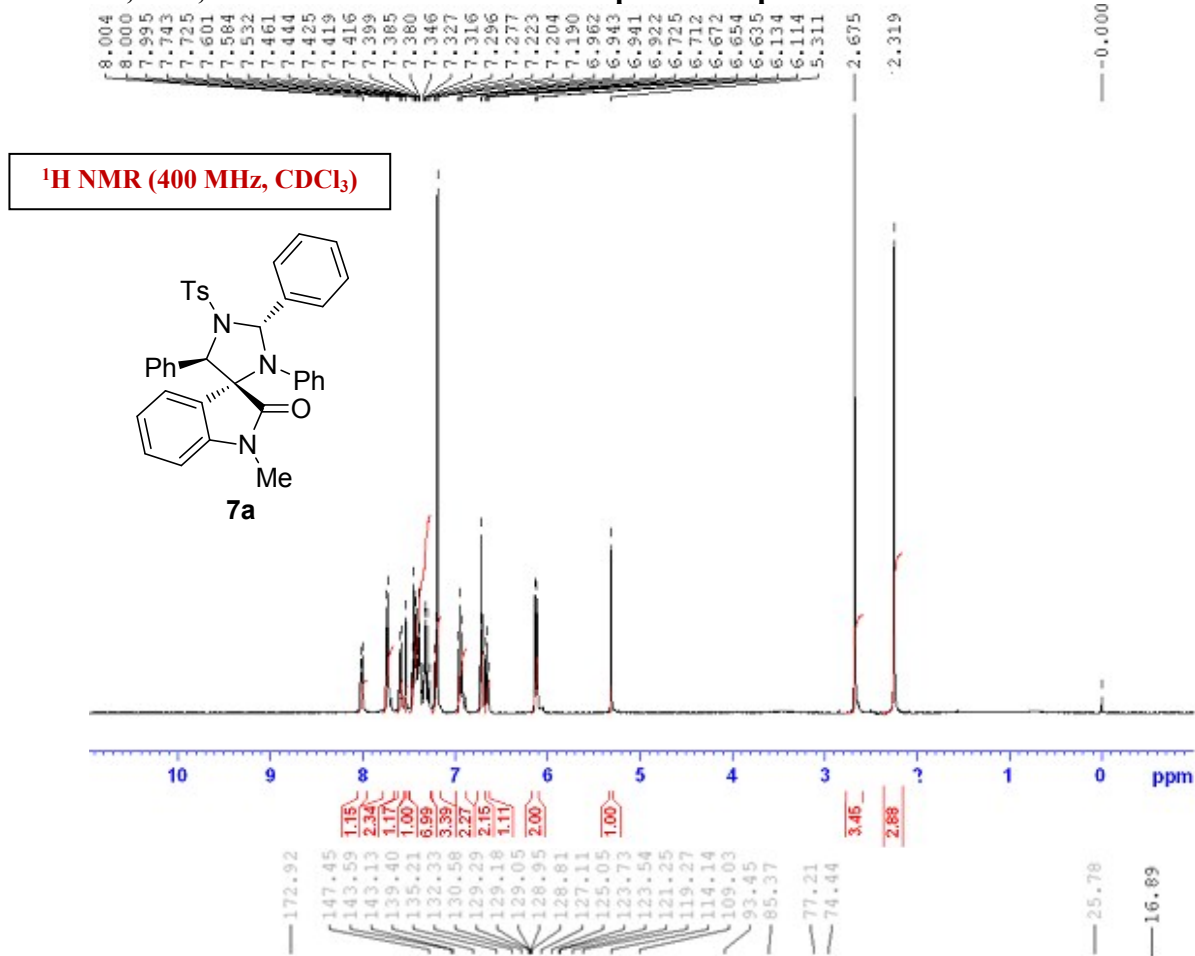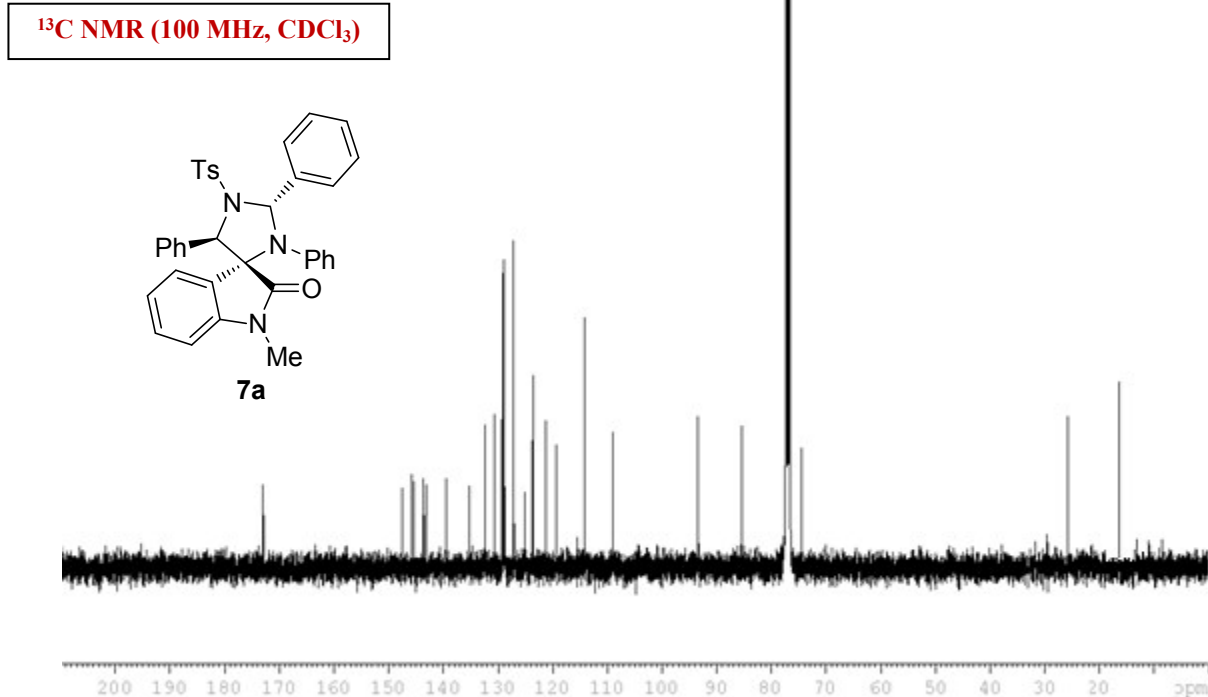

148.63  
 132.34  
 130.58  
 129.30  
 129.19  
 128.96  
 128.82  
 127.11  
 123.74  
 123.54  
 121.25  
 119.27  
 114.13  
 109.04  
 — 93.45  
 — 85.36  
 — 25.79  
 — 16.89

**<sup>13</sup>C DEPT135 NMR (100 MHz, CDCl<sub>3</sub>)**

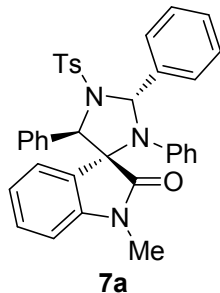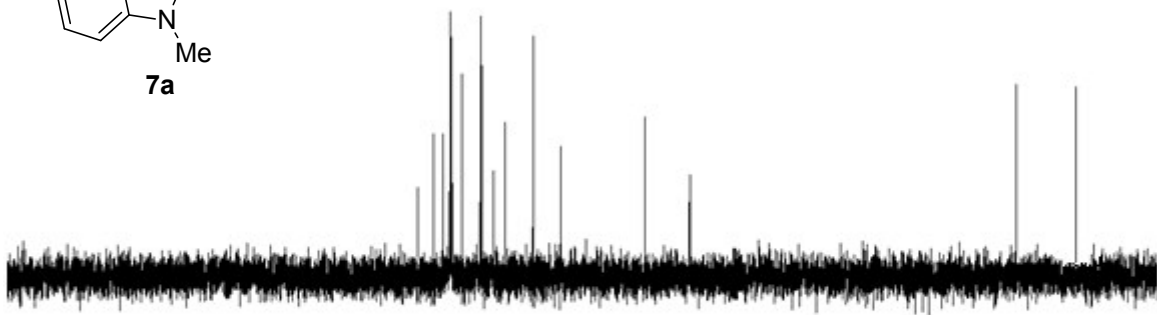

200 190 180 170 160 150 140 130 120 110 100 90 80 70 60 50 40 30 20 ppm

**HRMS Spectrum**

**Acquisition Parameter**

|             |            |                       |           |                  |           |
|-------------|------------|-----------------------|-----------|------------------|-----------|
| Source Type | ESI        | Ion Polarity          | Positive  | Set Nebulizer    | 0.3 Bar   |
| Focus       | Not active | Set Capillary         | 4500 V    | Set Dry Heater   | 180 °C    |
| Scan Begin  | 50 m/z     | Set End Plate Offset  | -500 V    | Set Dry Gas      | 4.0 l/min |
| Scan End    | 1500 m/z   | Set Collision Cell RF | 100.0 Vpp | Set Divert Valve | Source    |

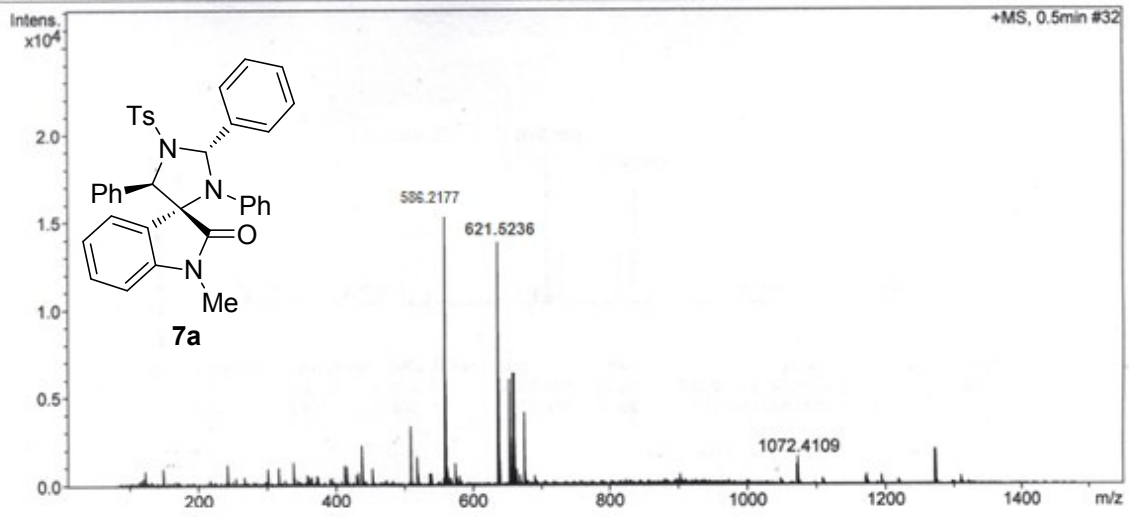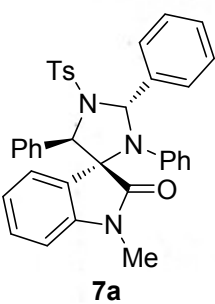

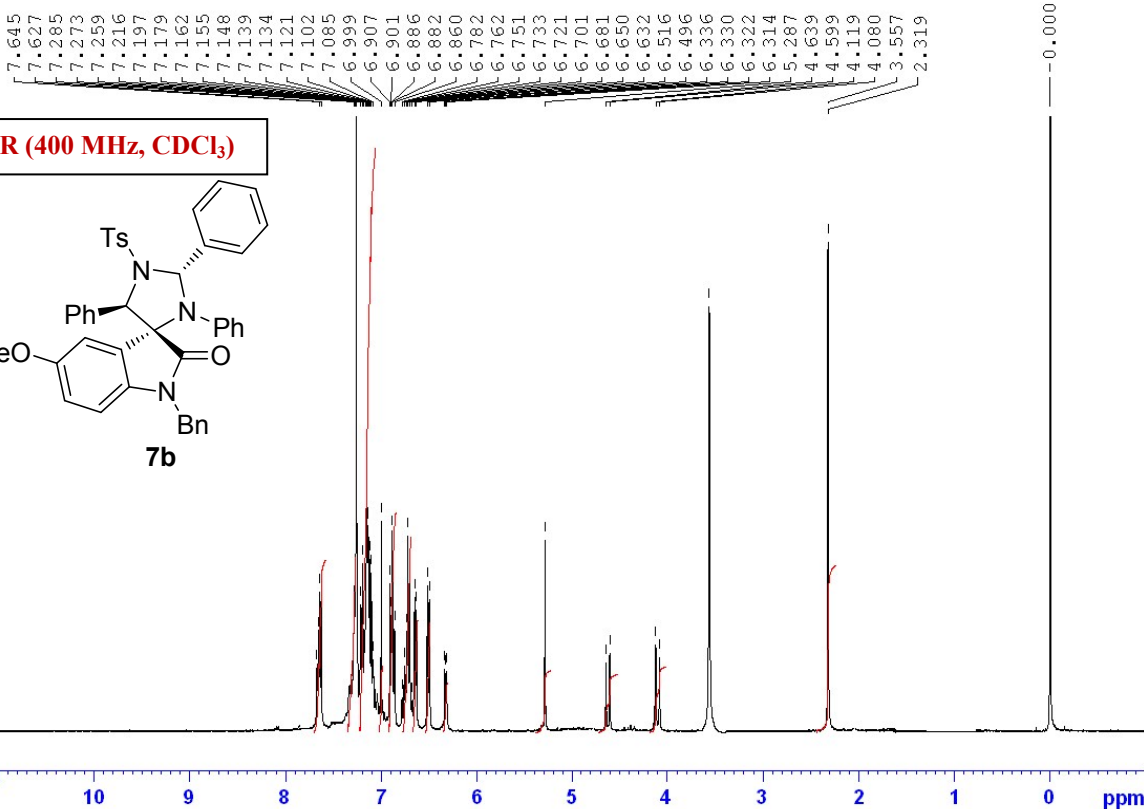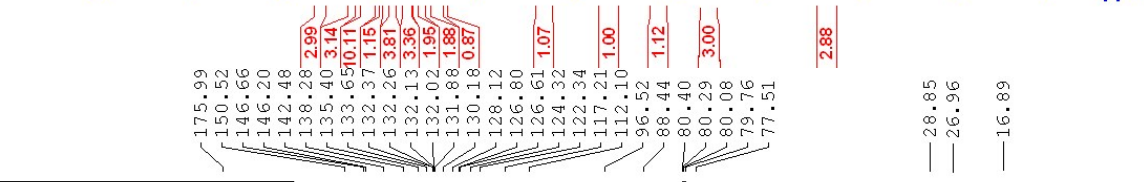



**<sup>13</sup>C DEPT135 NMR (100 MHz, CDCl<sub>3</sub>)**

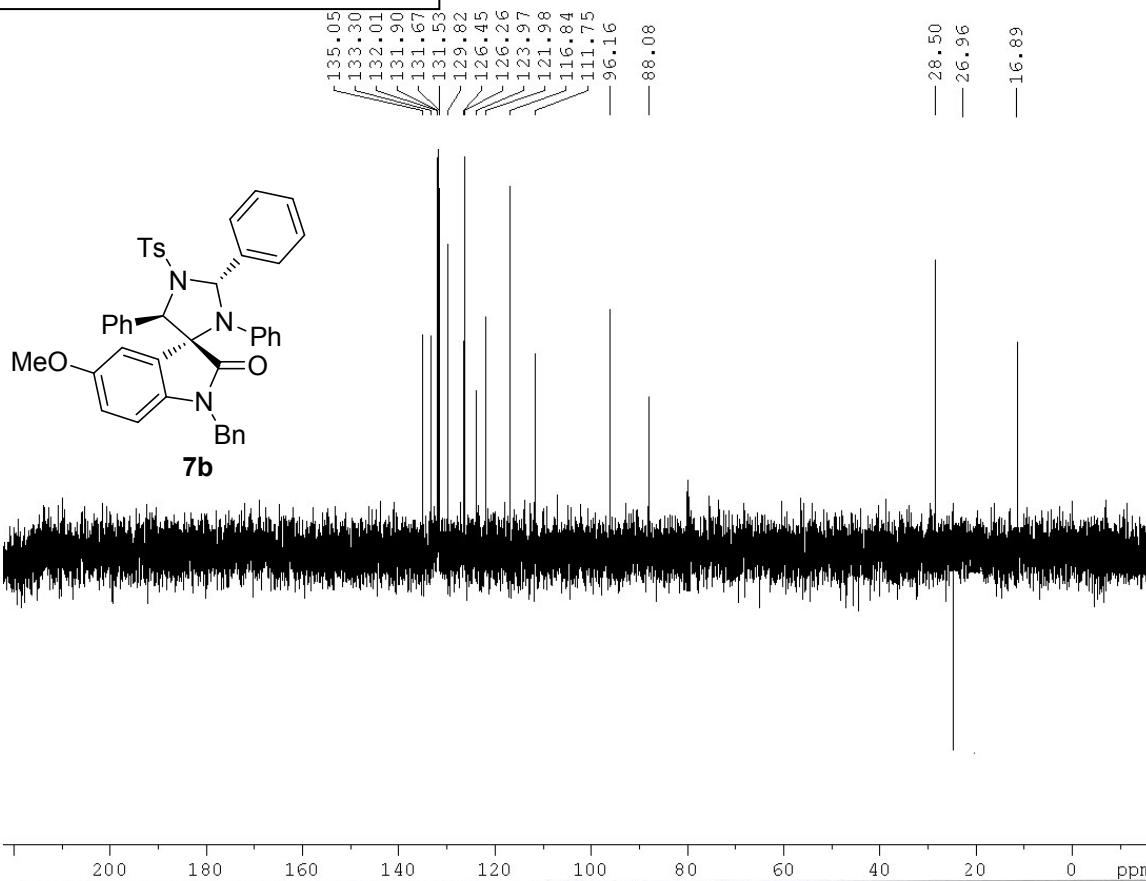

**Acquisition Parameter**

|             |            |                       |           |                  |           |
|-------------|------------|-----------------------|-----------|------------------|-----------|
| Source Type | ESI        | Ion Polarity          | Positive  | Set Nebulizer    | 0.3 Bar   |
| Focus       | Not active | Set Capillary         | 4500 V    | Set Dry Heater   | 180 °C    |
| Scan Begin  | 50 m/z     | Set End Plate Offset  | -500 V    | Set Dry Gas      | 4.0 l/min |
| Scan End    | 1500 m/z   | Set Collision Cell RF | 100.0 Vpp | Set Divert Valve | Source    |

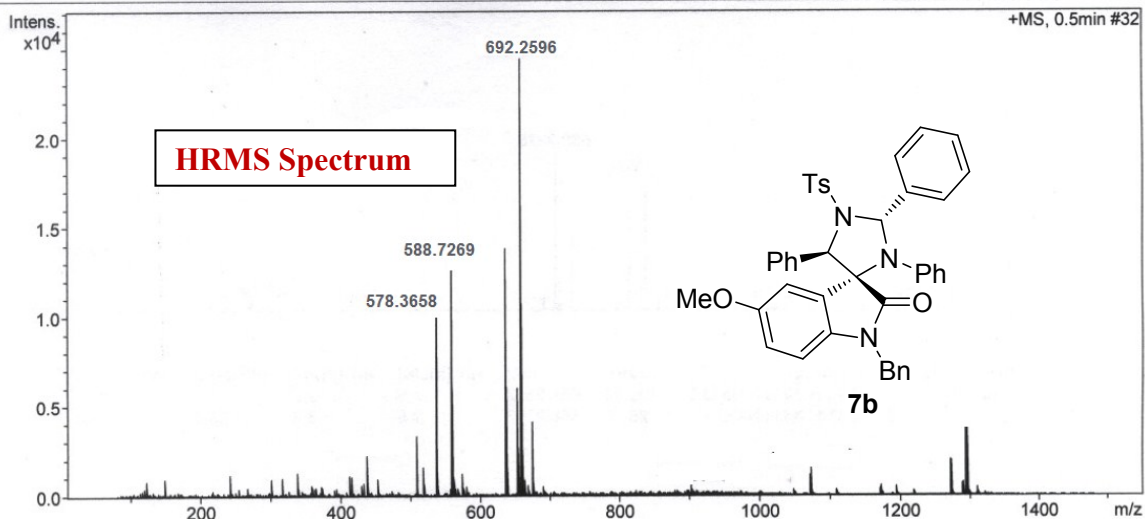

**<sup>1</sup>H NMR (400 MHz, CDCl<sub>3</sub>)**

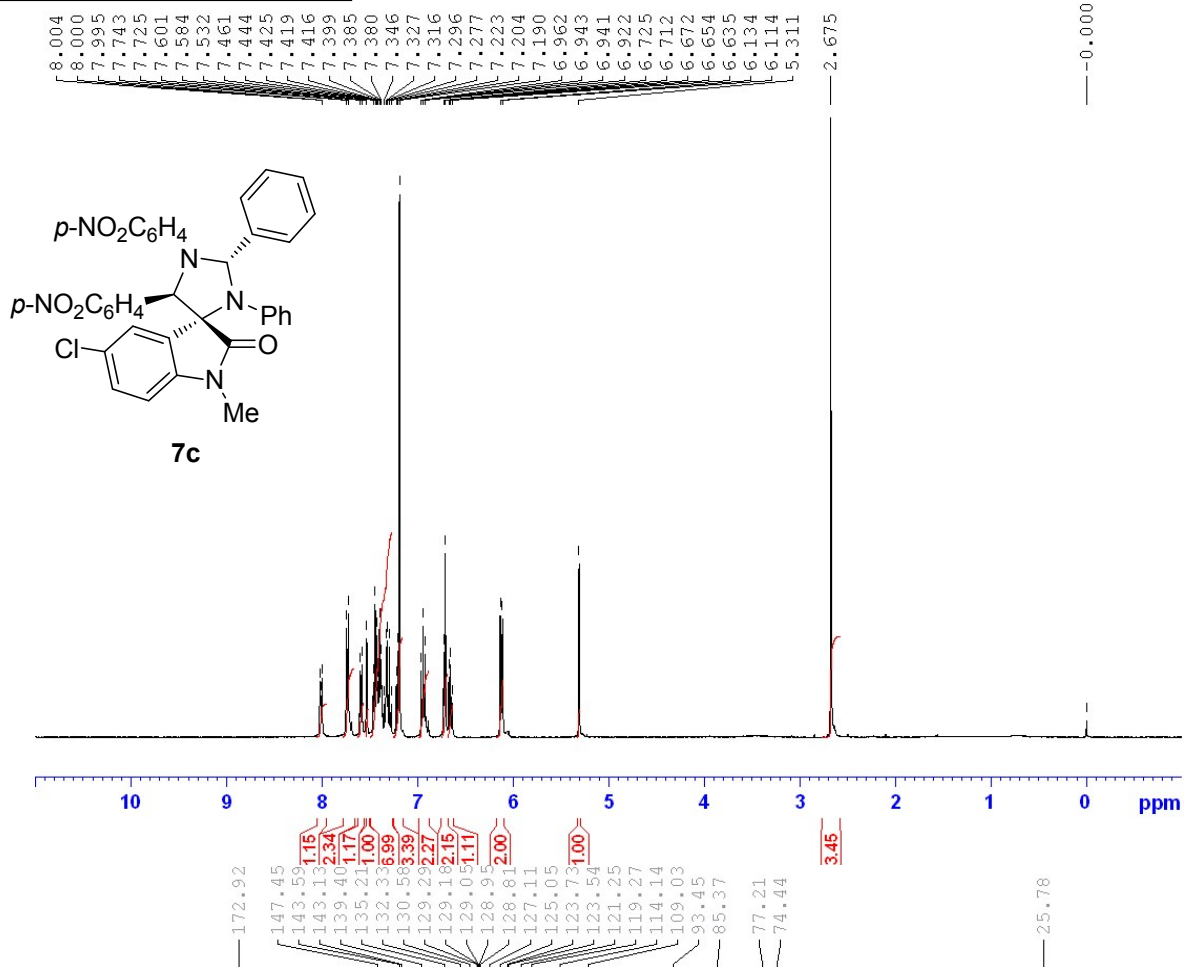

**<sup>13</sup>C NMR (100 MHz, CDCl<sub>3</sub>)**

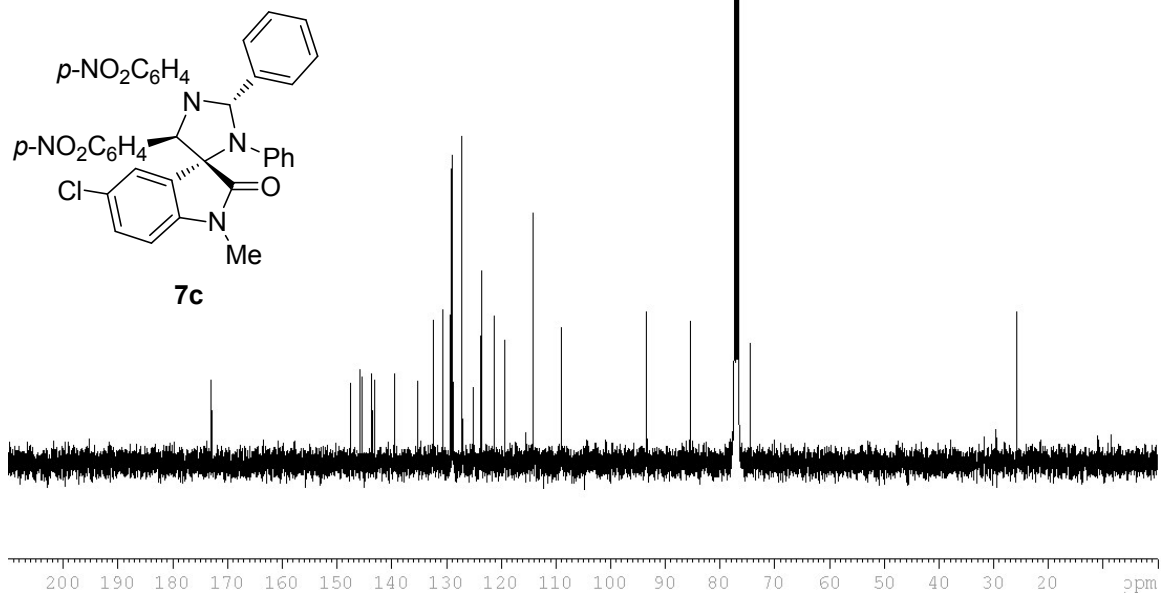

### <sup>13</sup>C DEPT135 NMR (100 MHz, CDCl<sub>3</sub>)

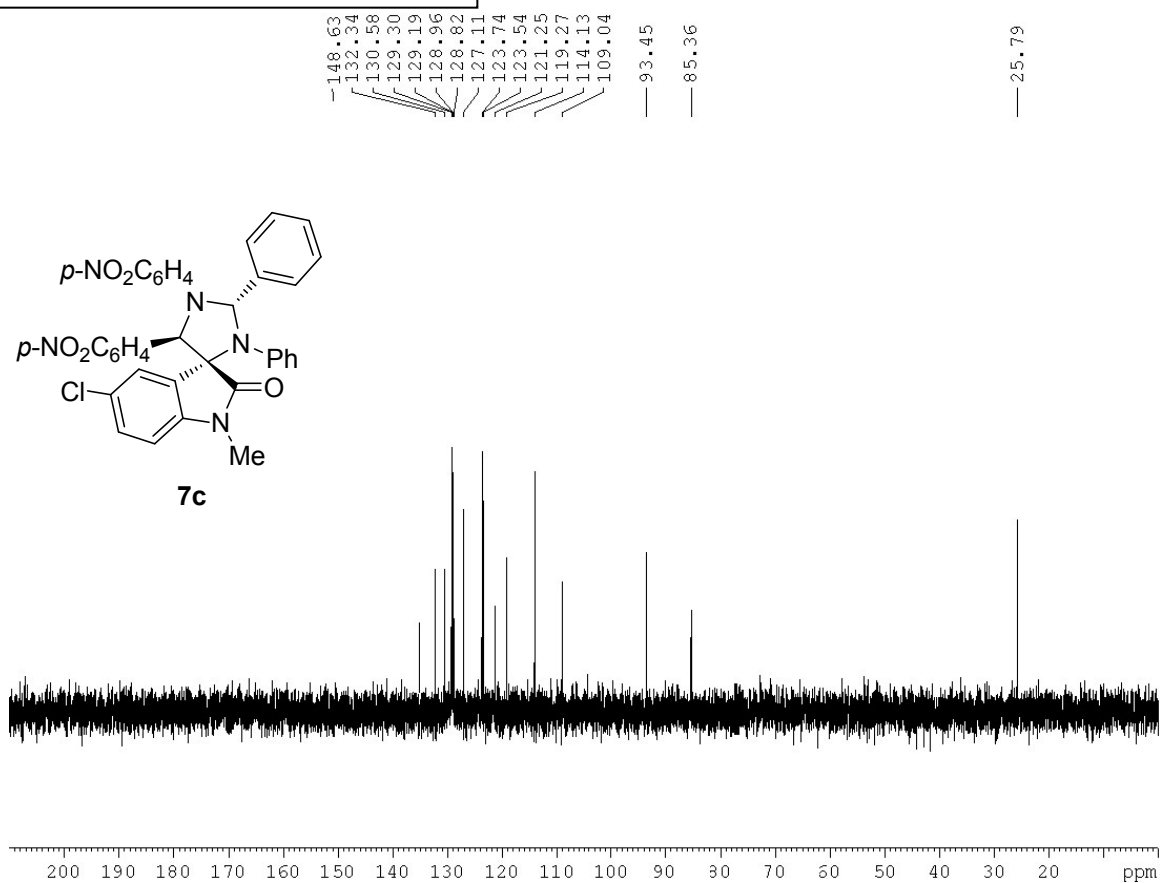

### HRMS Spectrum

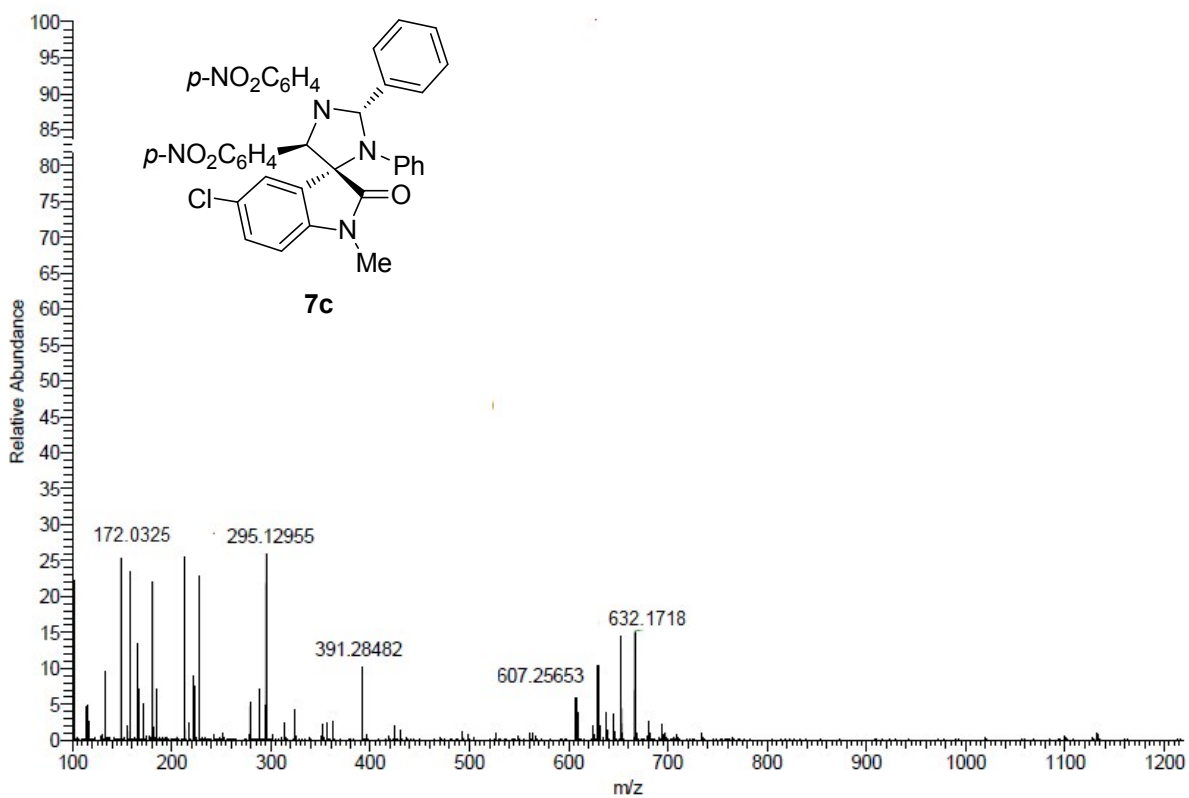

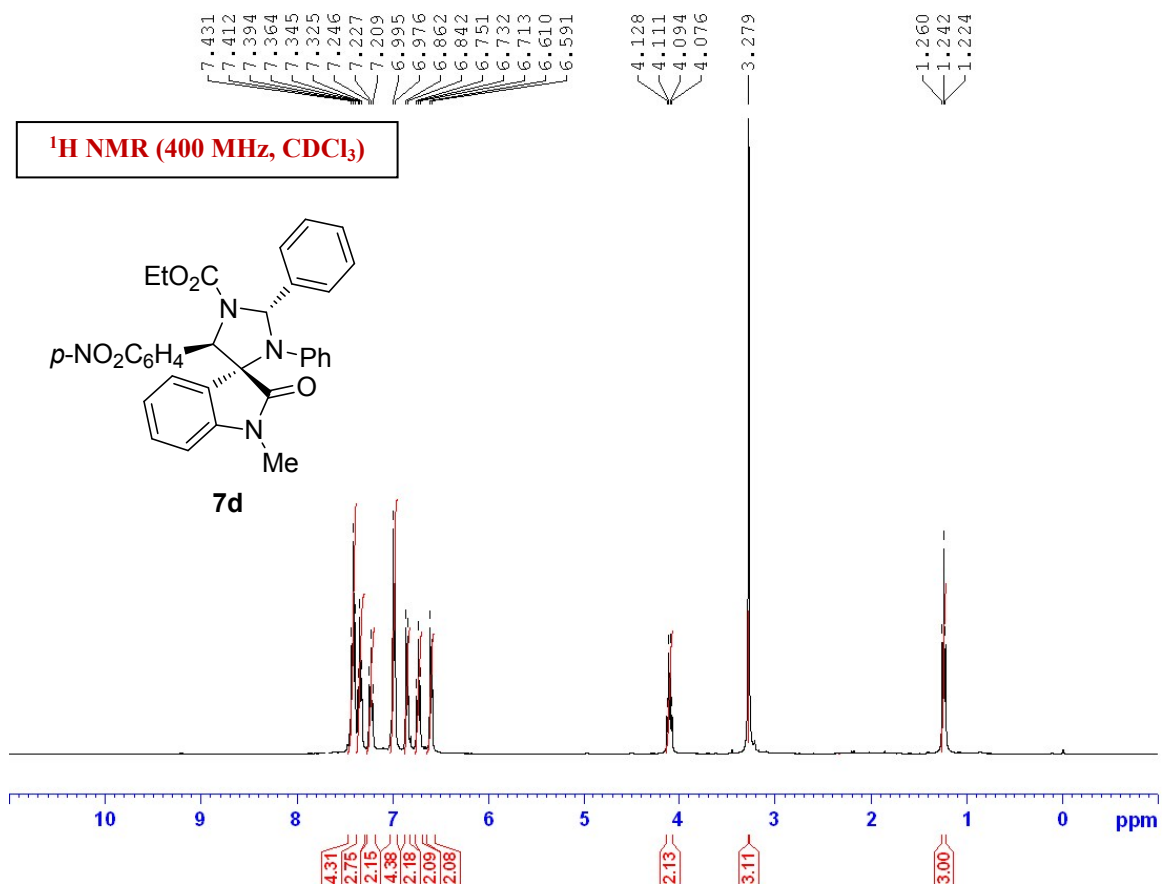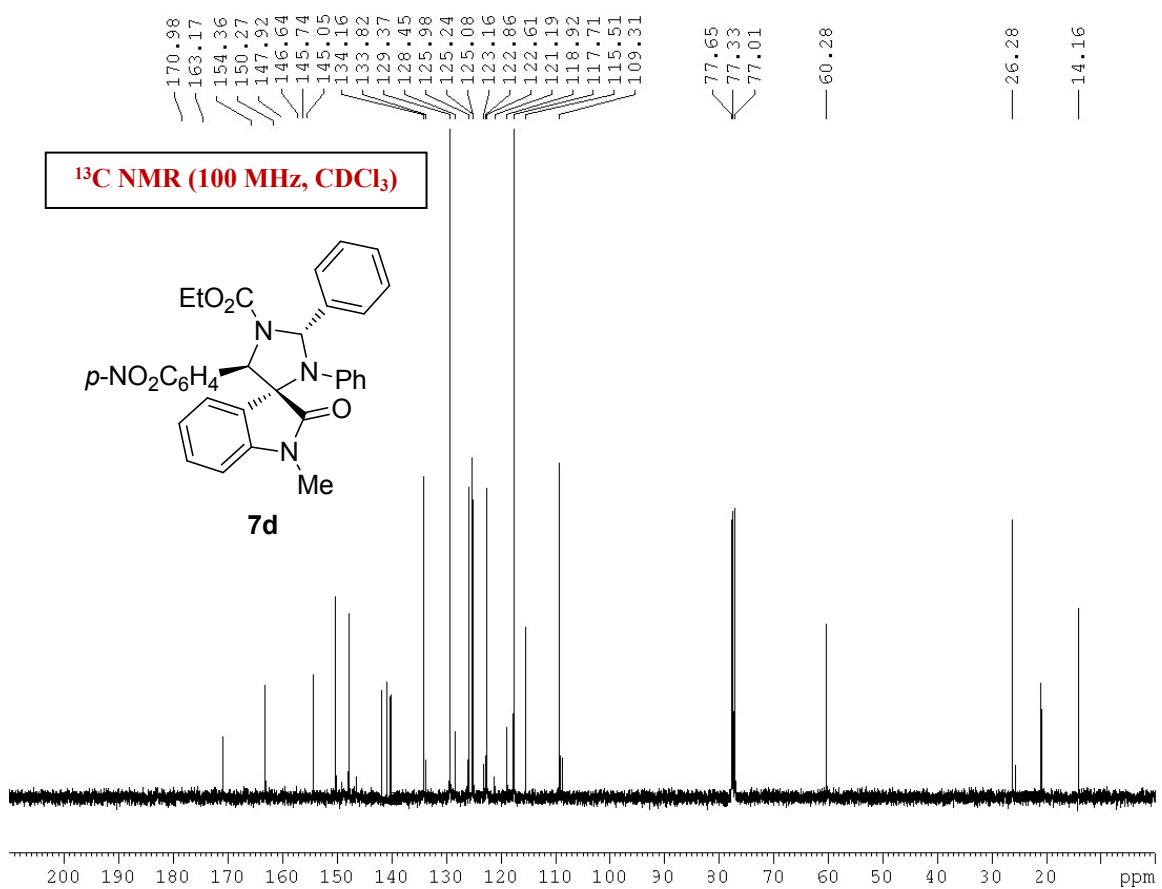

**<sup>13</sup>C DEPT135 NMR (100 MHz, CDCl<sub>3</sub>)**

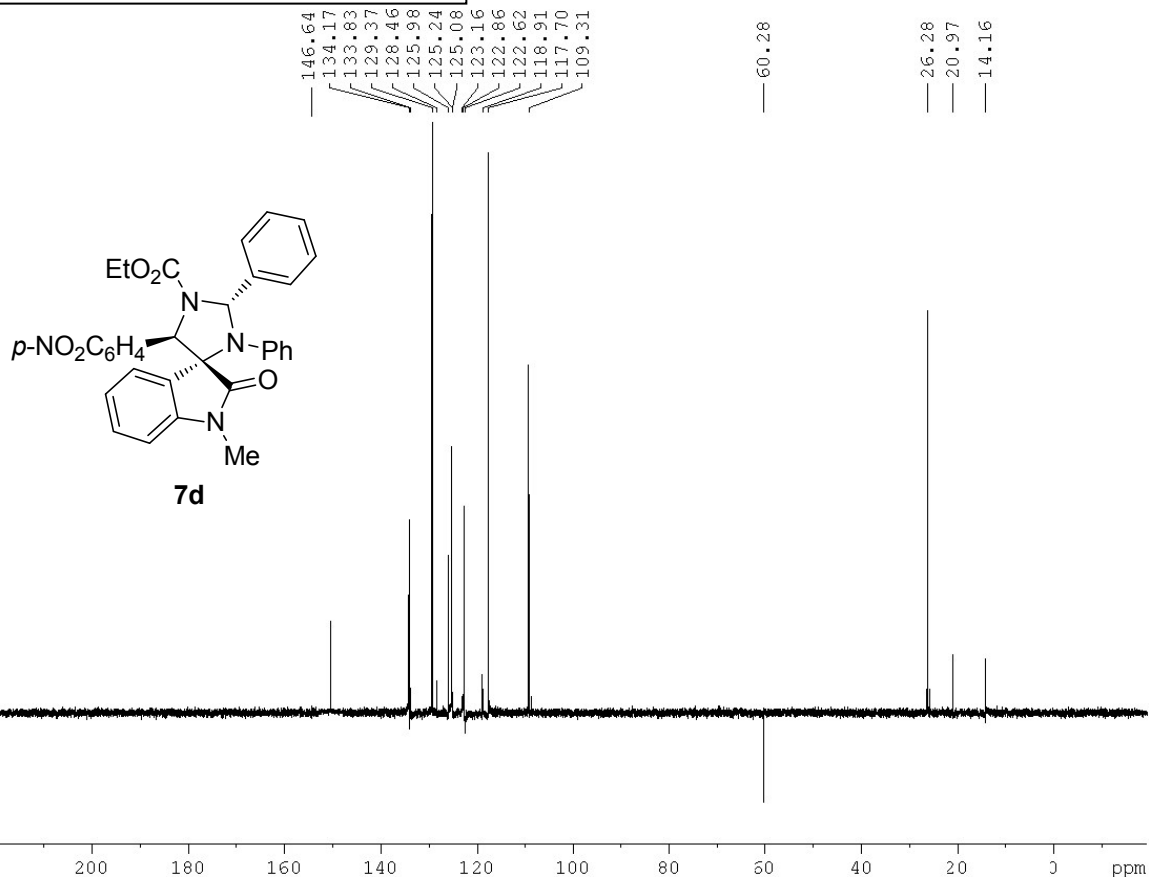

MSGK-299 #63 RT: 0.94 AV: 1 NL: 1.00E6  
: FTMS {1,1} + p ESI Full lock ms [100.00-2000.00]

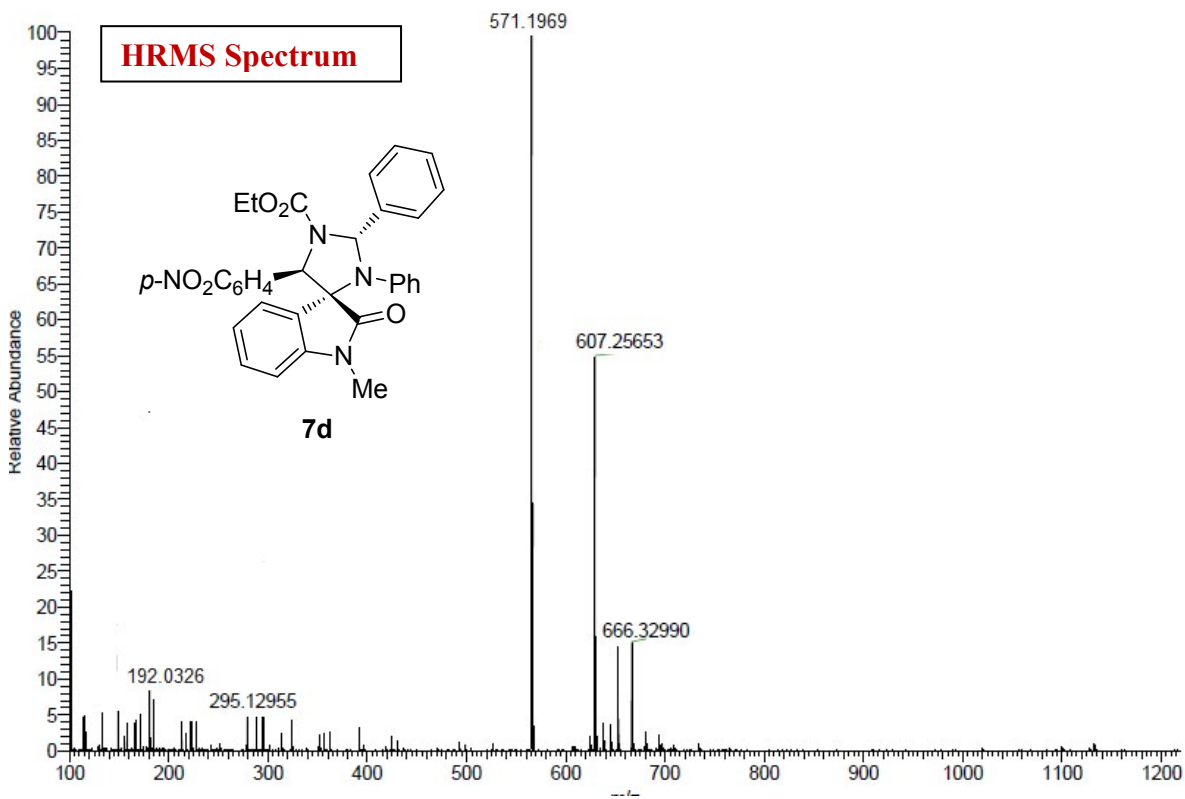

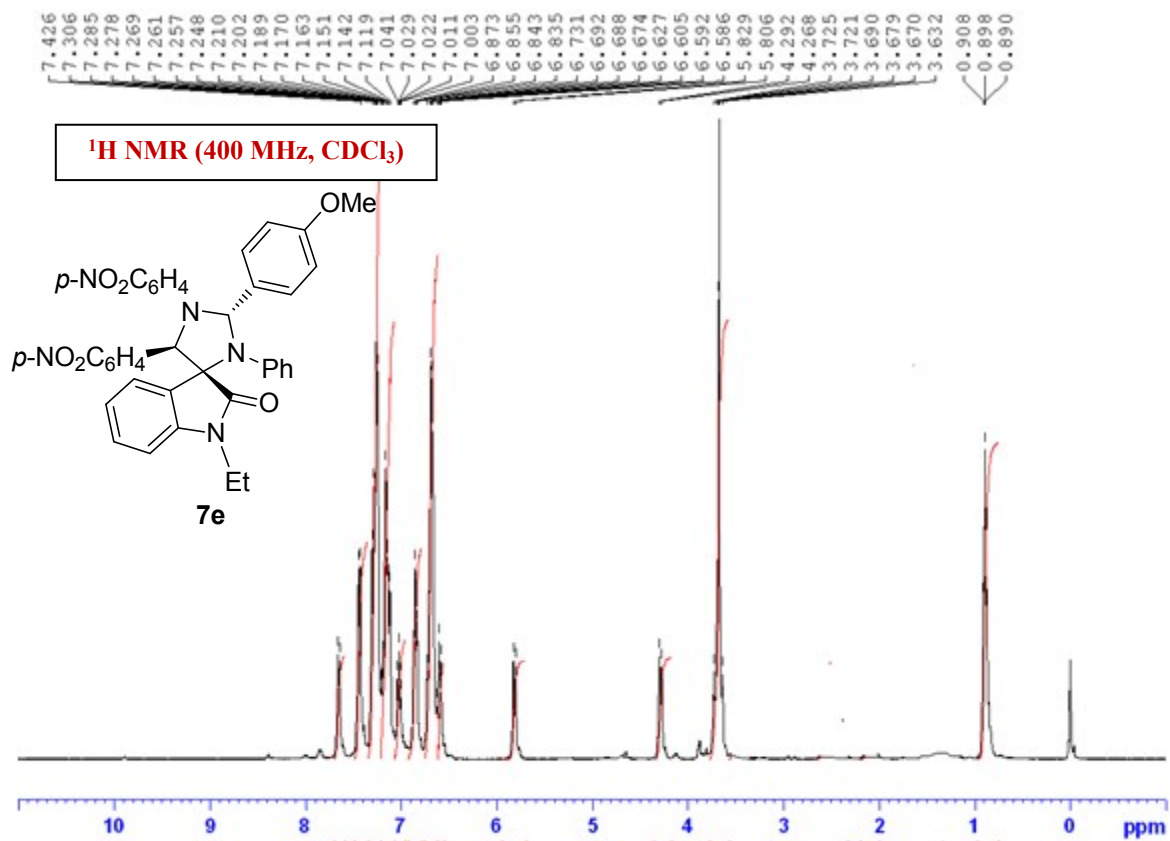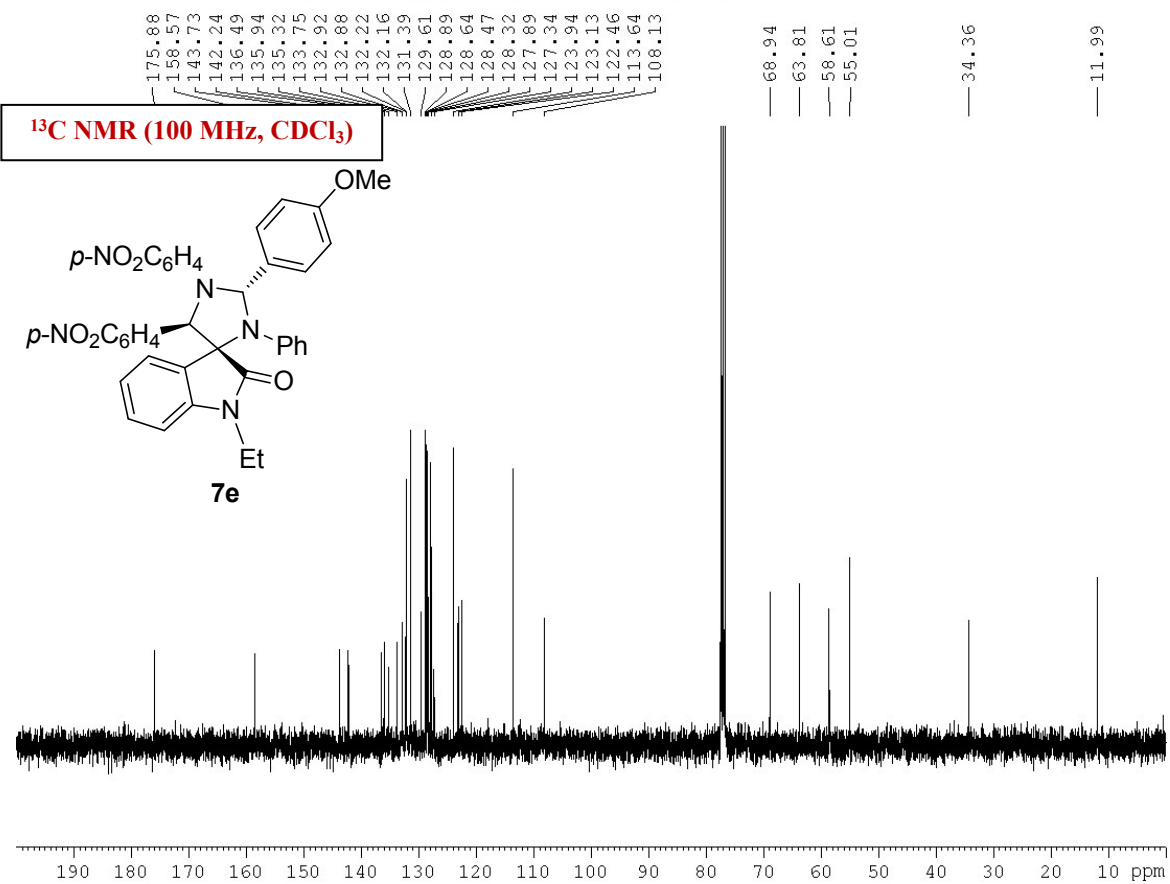

### <sup>13</sup>C DEPT135 NMR (100 MHz, CDCl<sub>3</sub>)

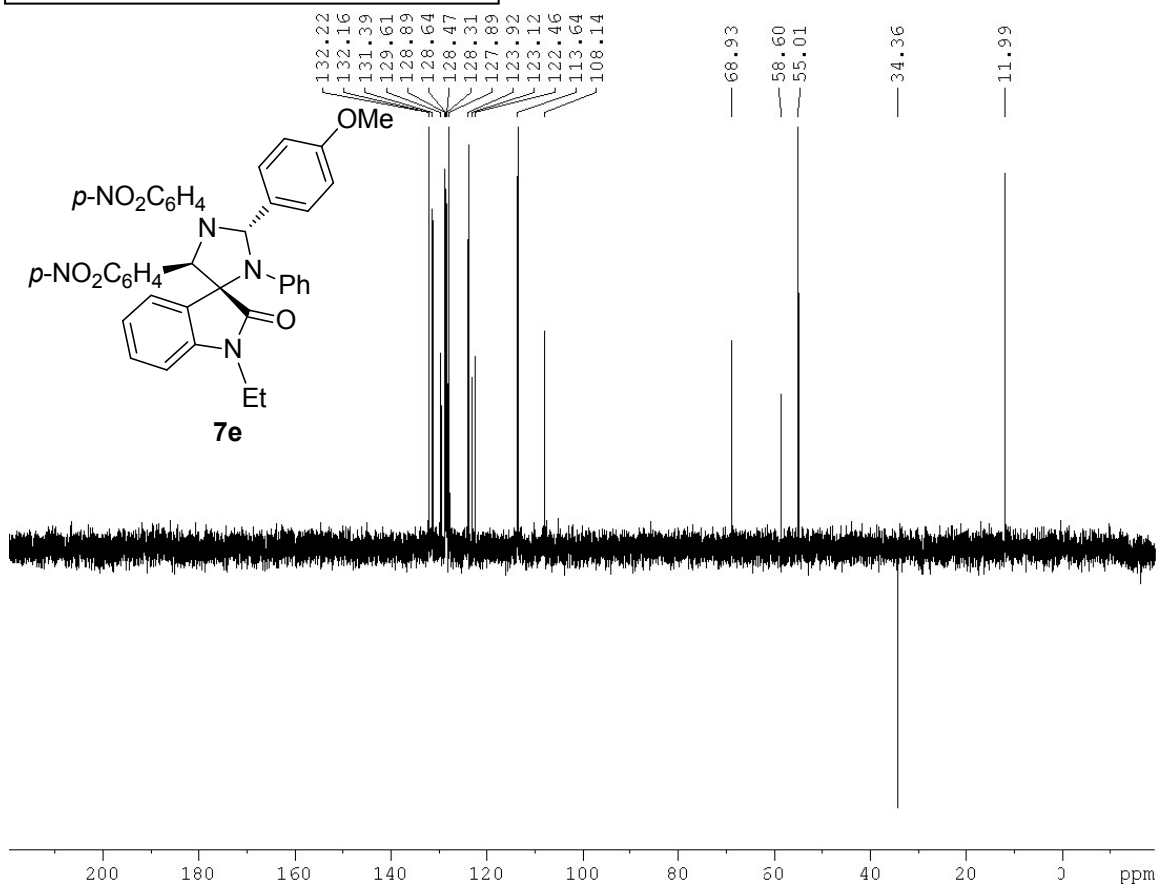

### HRMS Spectrum

#### Acquisition Parameter

|             |            |                       |           |                  |           |
|-------------|------------|-----------------------|-----------|------------------|-----------|
| Source Type | ESI        | Ion Polarity          | Positive  | Set Nebulizer    | 0.3 Bar   |
| Focus       | Not active | Set Capillary         | 4500 V    | Set Dry Heater   | 180 °C    |
| Scan Begin  | 50 m/z     | Set End Plate Offset  | -500 V    | Set Dry Gas      | 4.0 l/min |
| Scan End    | 1500 m/z   | Set Collision Cell RF | 100.0 Vpp | Set Divert Valve | Source    |

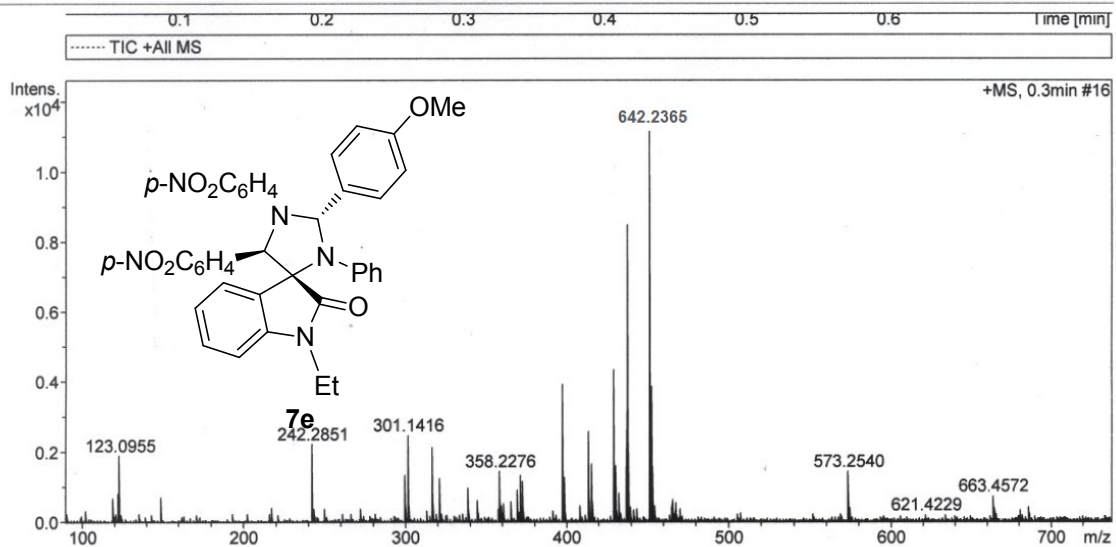

**<sup>1</sup>H NMR (400 MHz, CDCl<sub>3</sub>)**

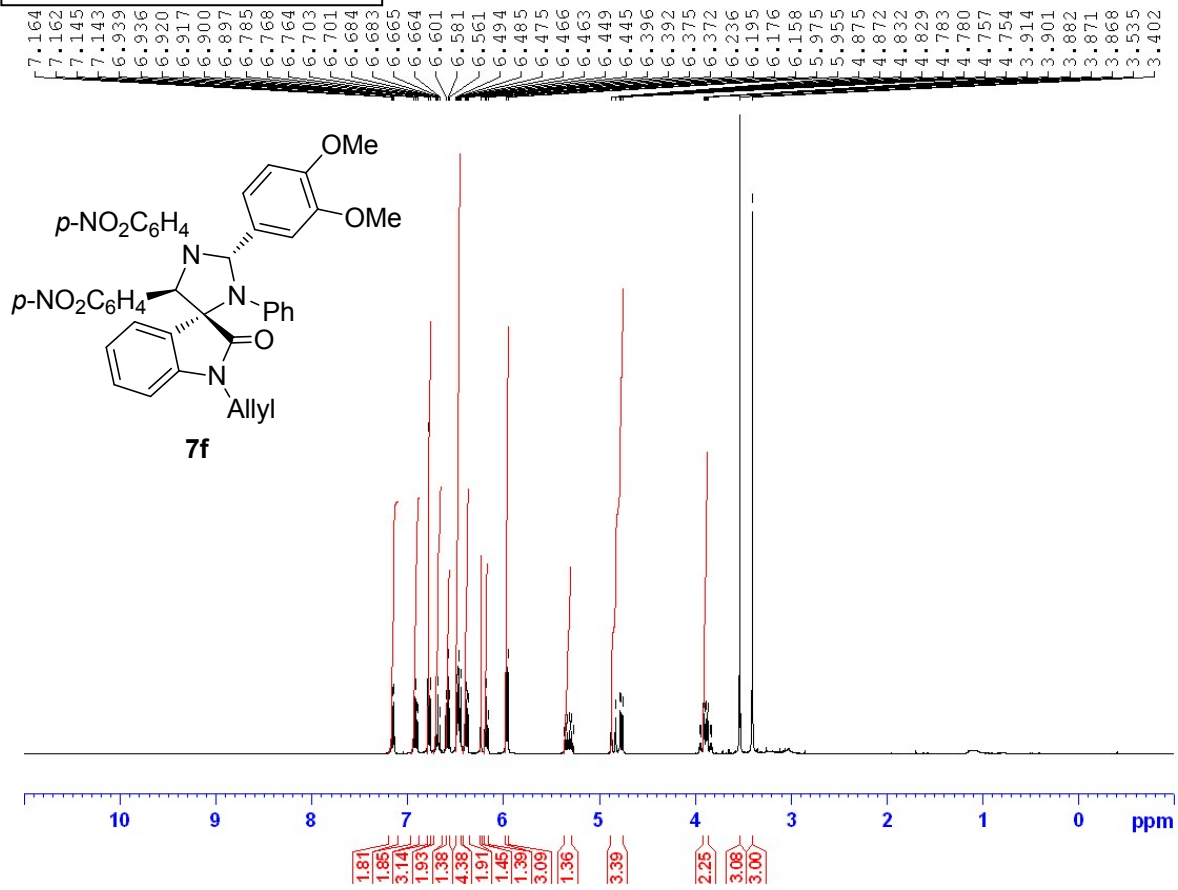

**<sup>13</sup>C NMR (100 MHz, CDCl<sub>3</sub>)**

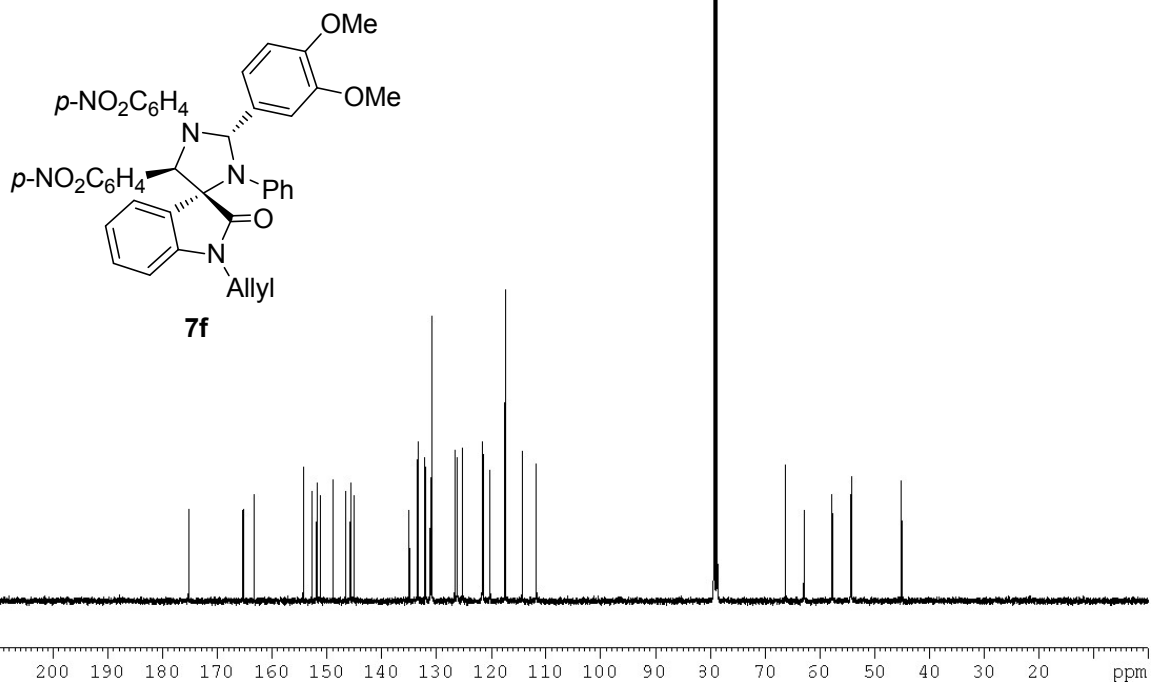



**<sup>13</sup>C DEPT135 NMR (100 MHz, CDCl<sub>3</sub>)**

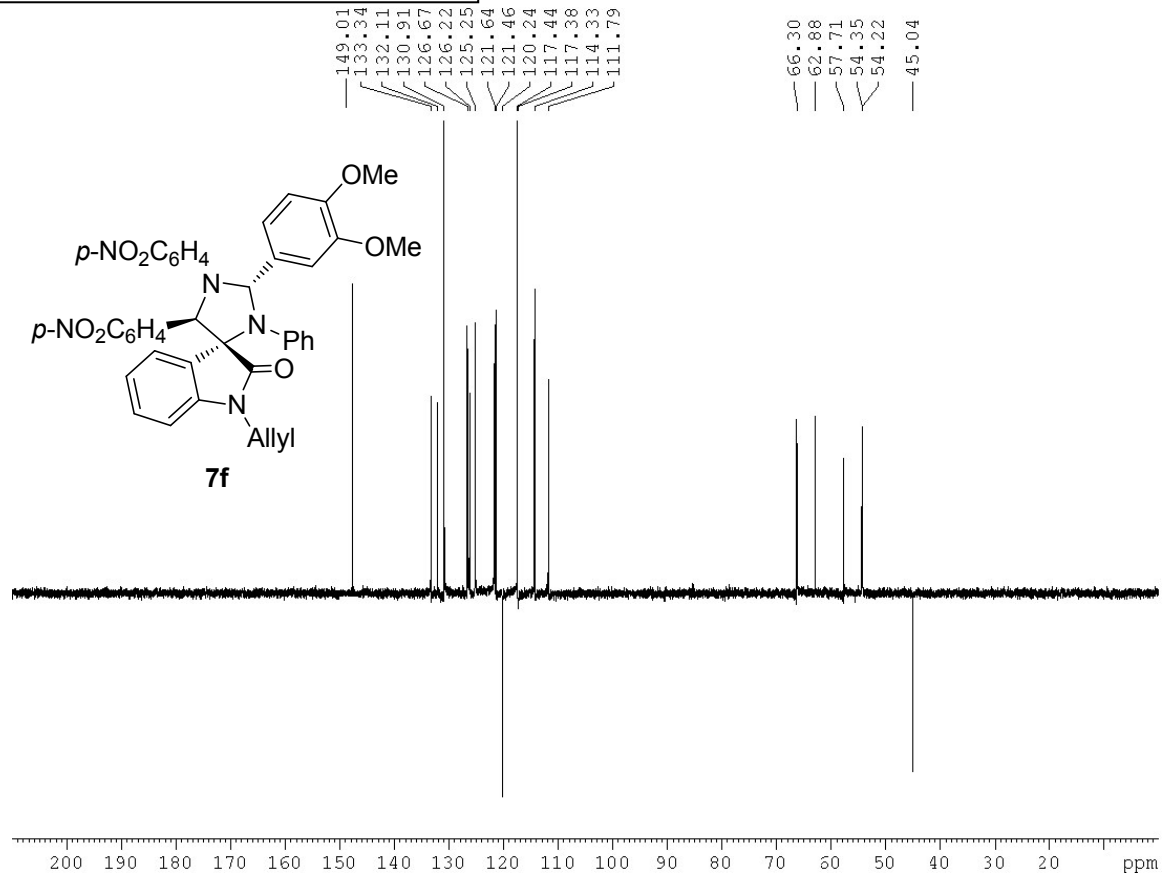

**HRMS Spectrum**

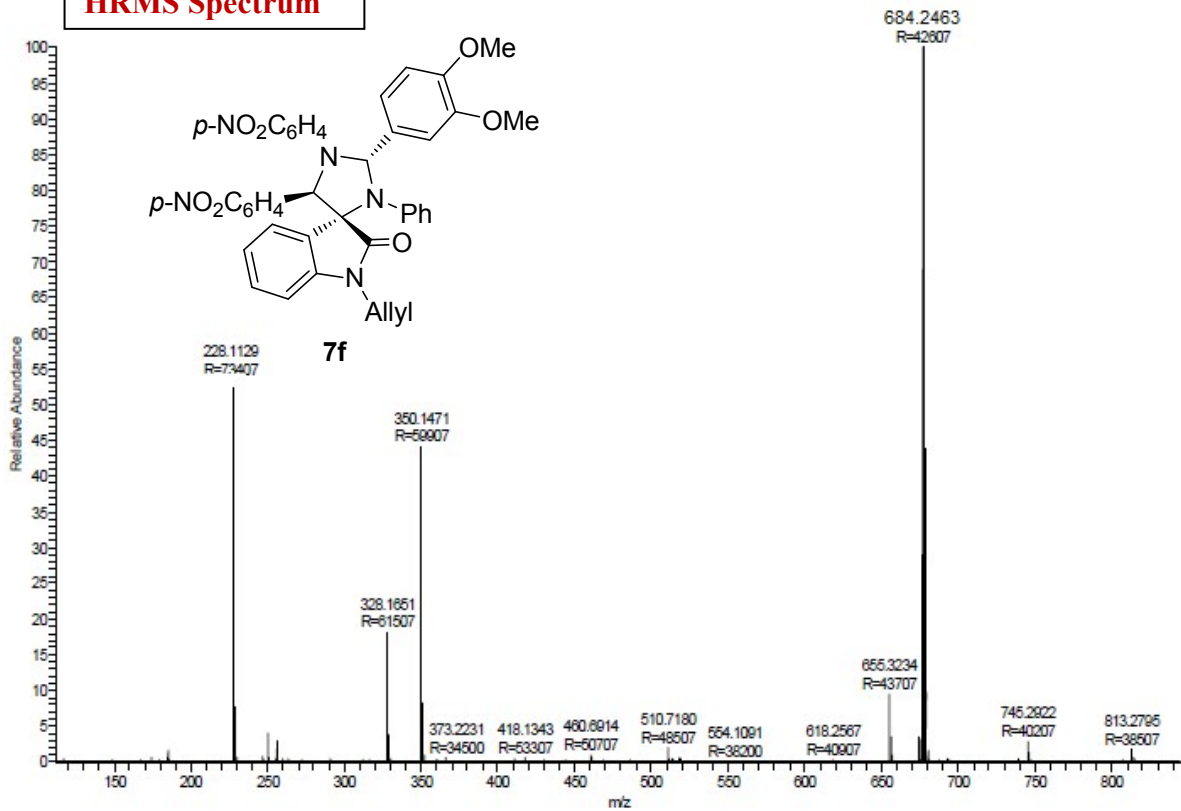

**<sup>1</sup>H NMR (400 MHz, CDCl<sub>3</sub>)**

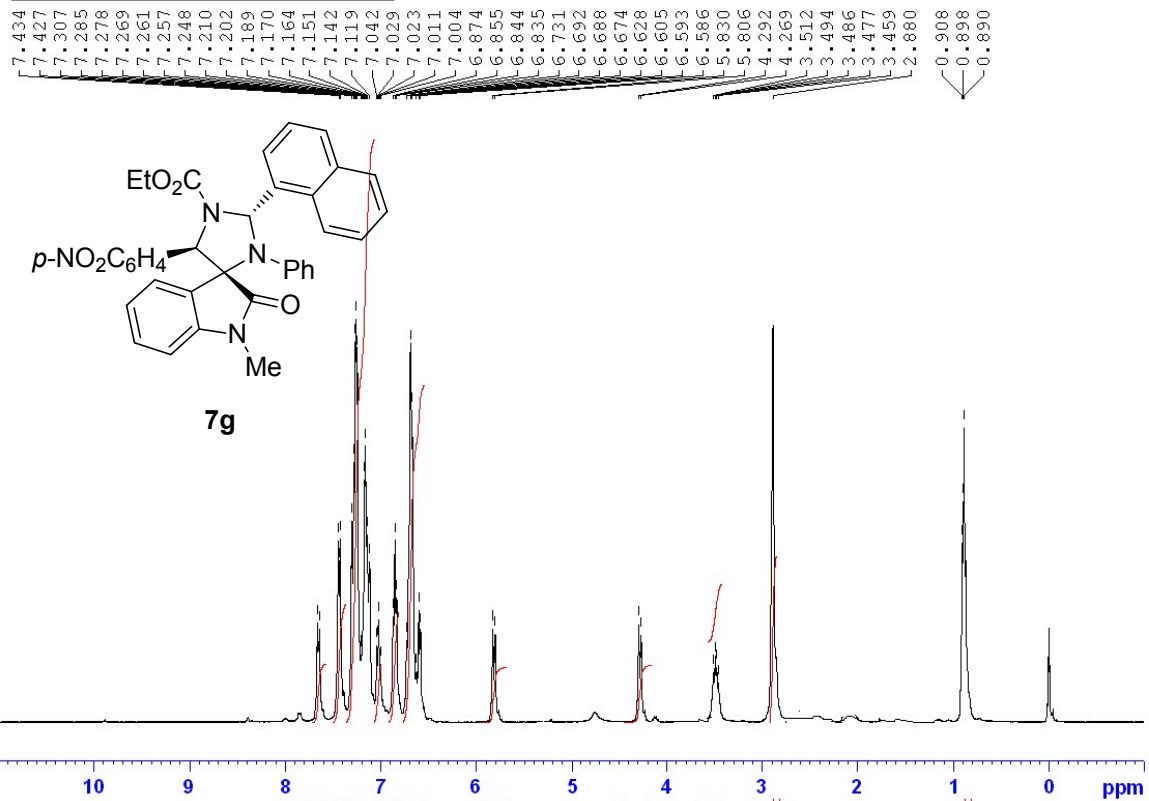

**<sup>13</sup>C NMR (100 MHz, CDCl<sub>3</sub>)**

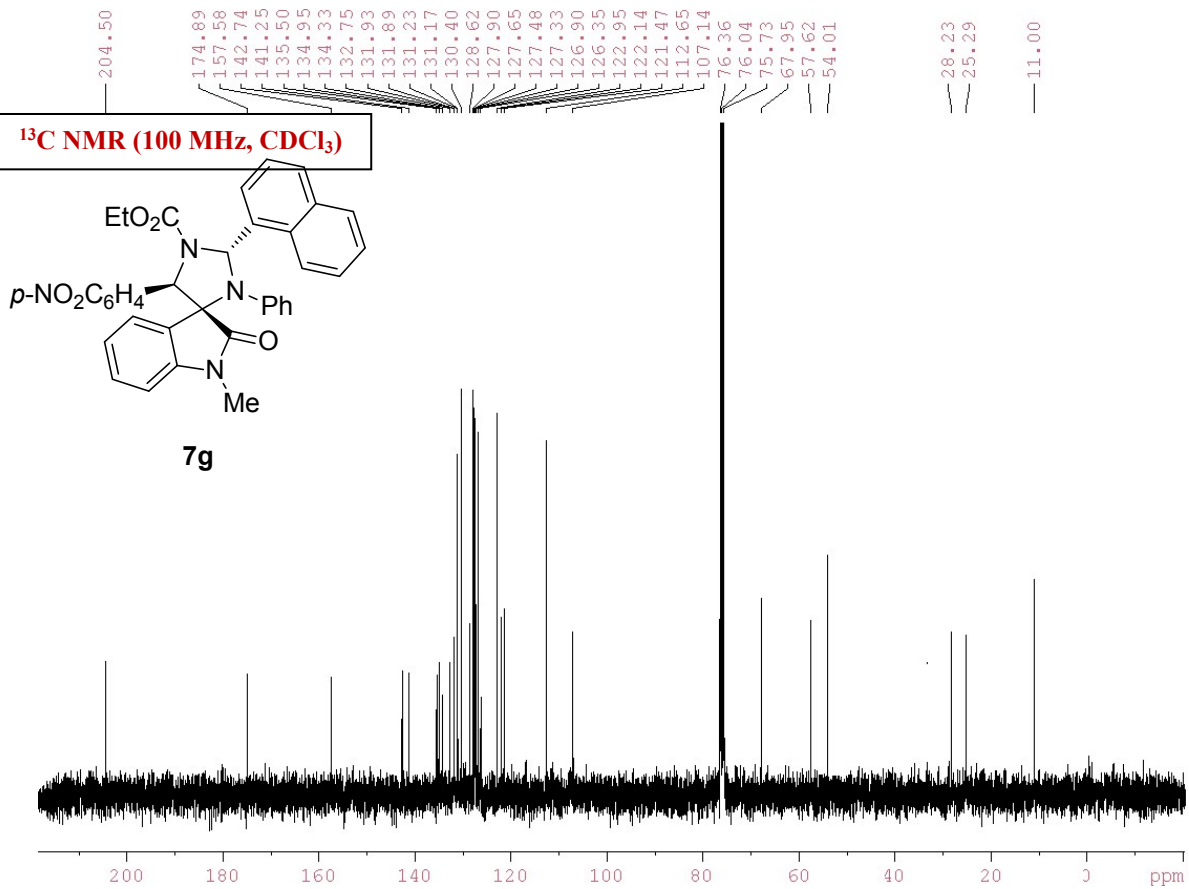

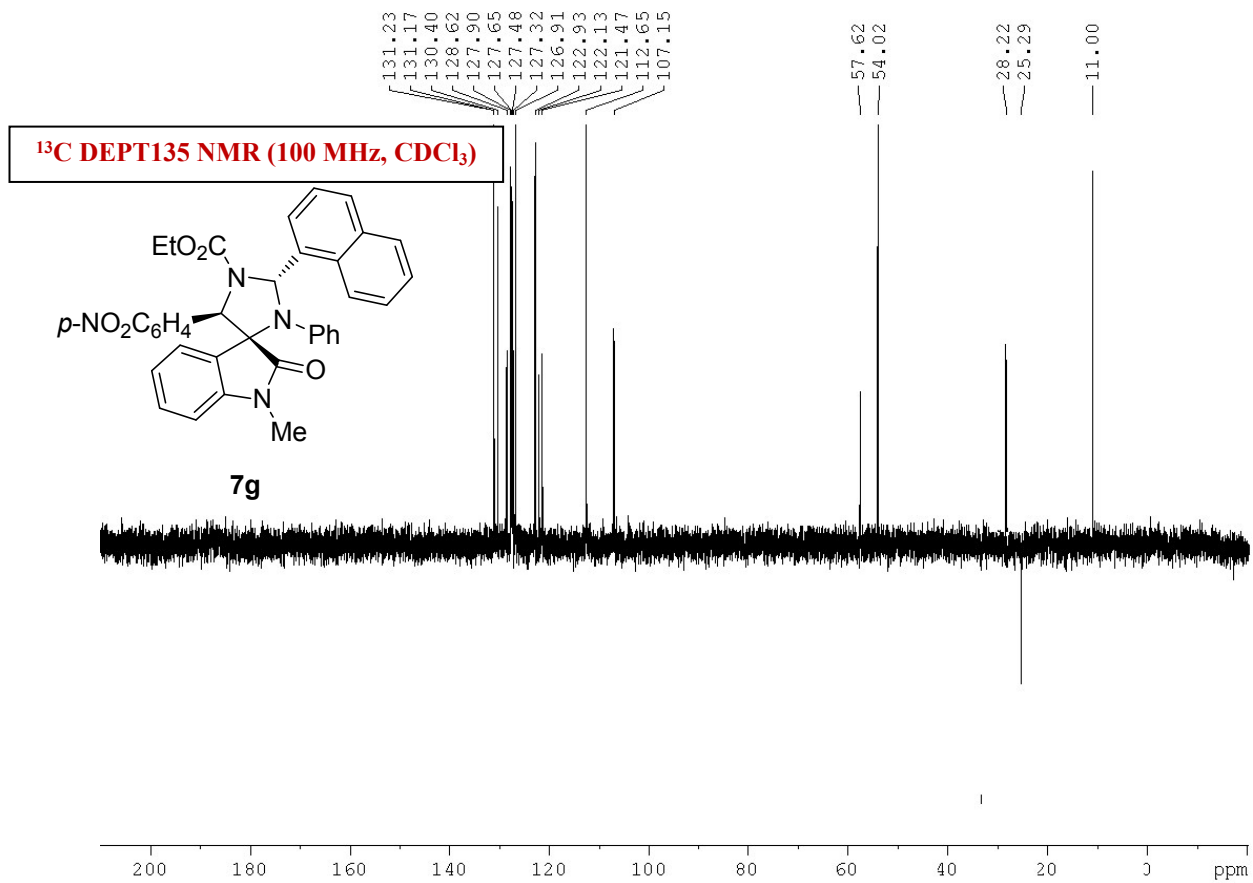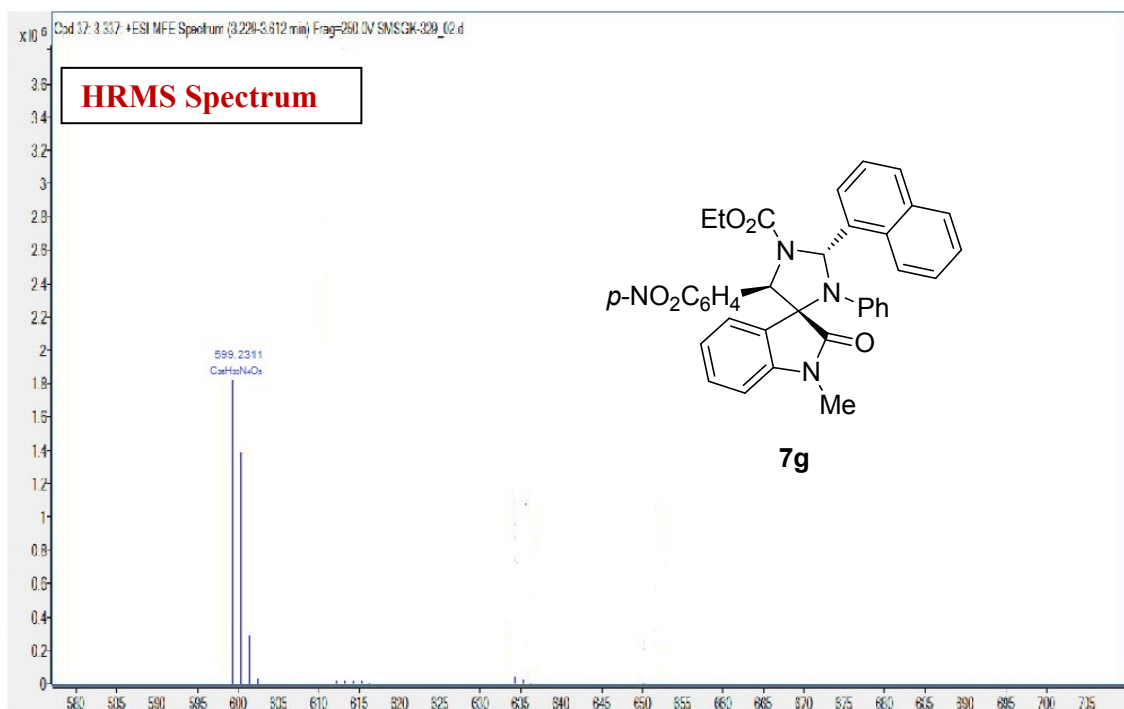

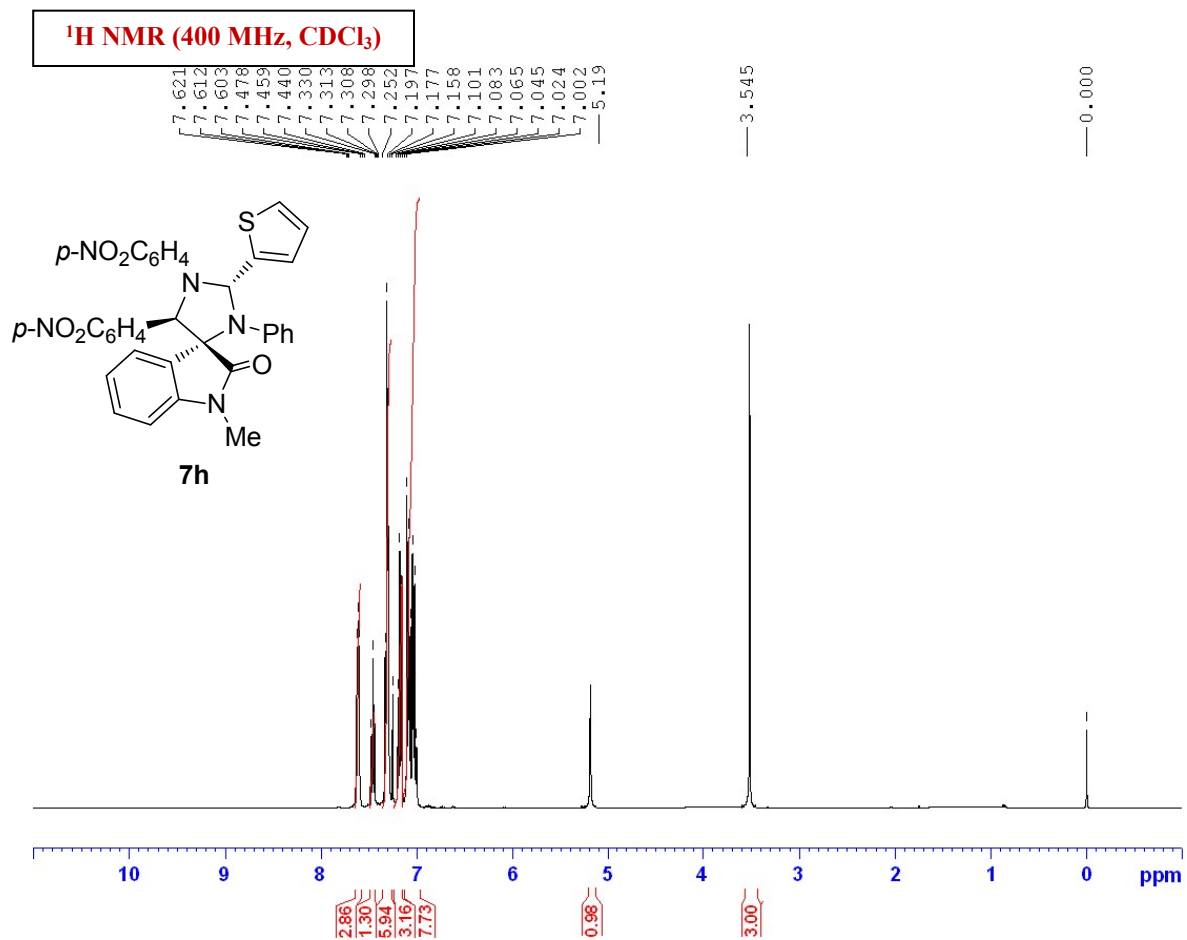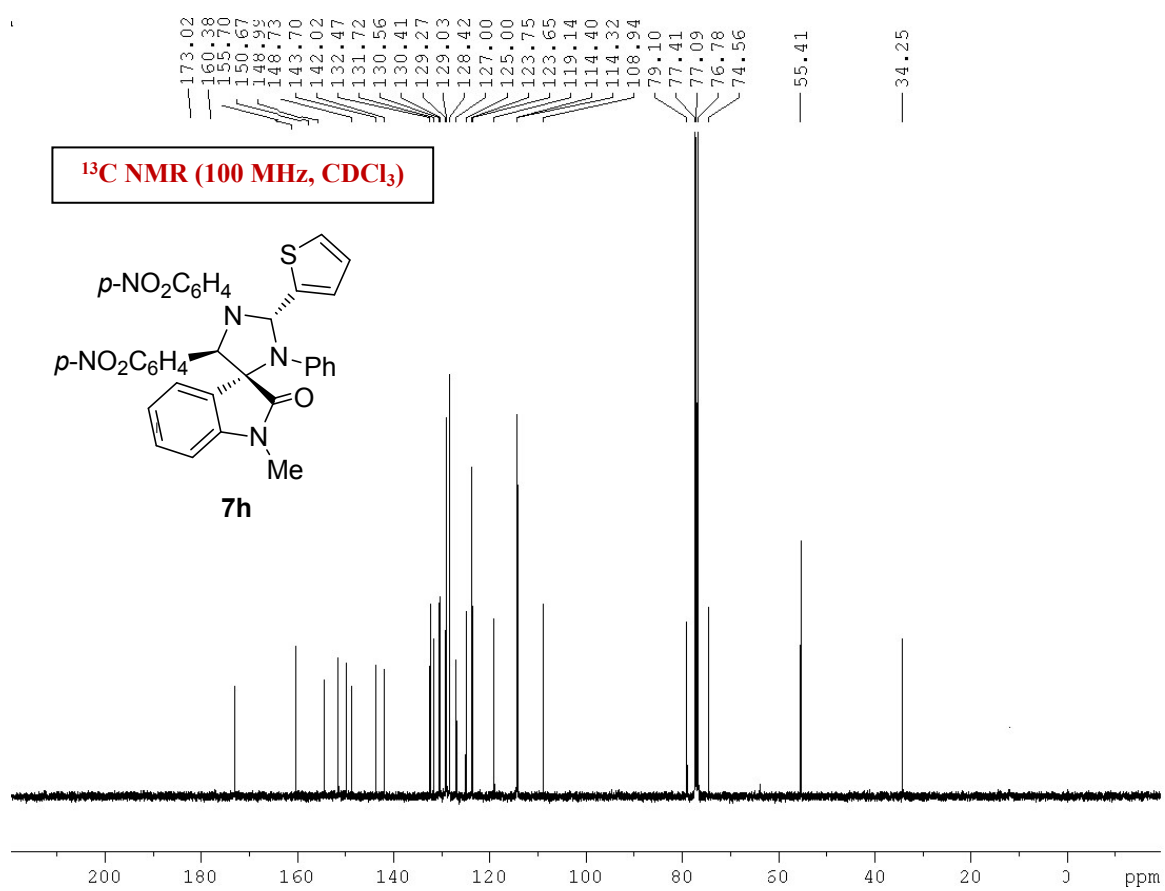

**<sup>13</sup>C DEPT135 NMR (100 MHz, CDCl<sub>3</sub>)**

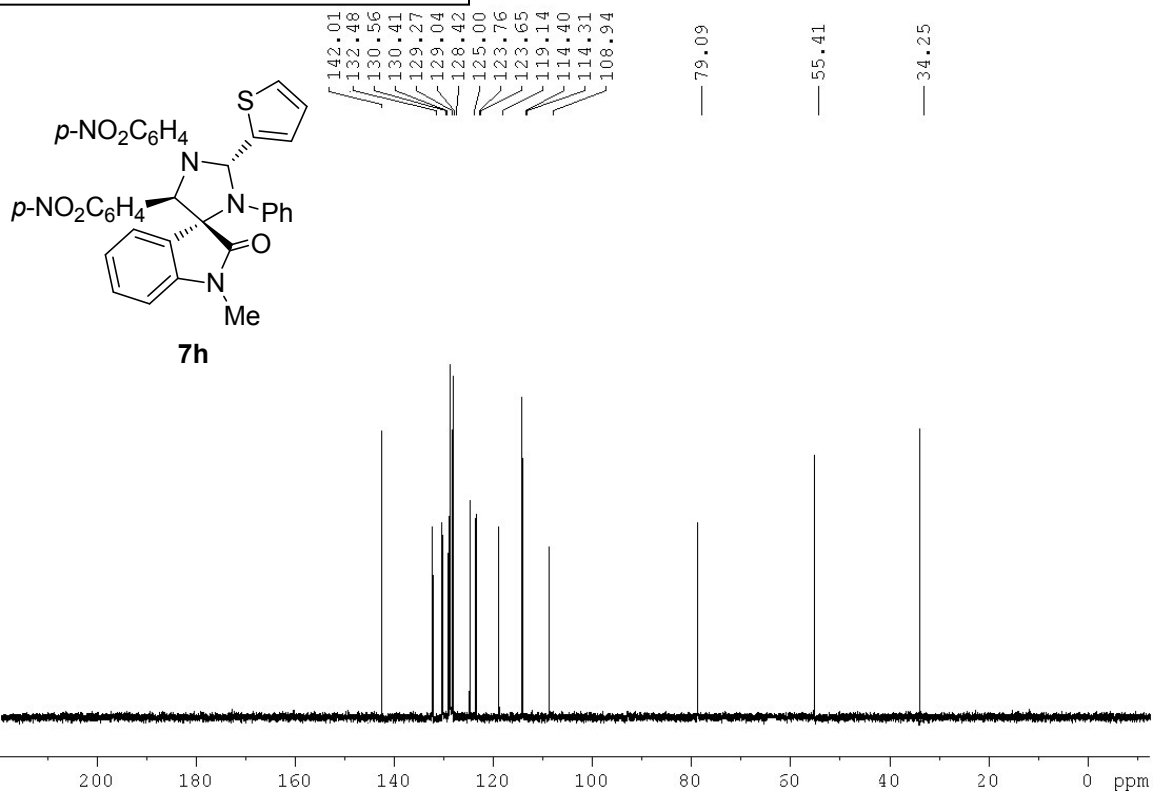

MSGK-299 #63 RT: 0.94 AV: 1 NL: 1.00E6  
: FTMS (1,1) + p ESI Full lock ms [100.00-2000.00]

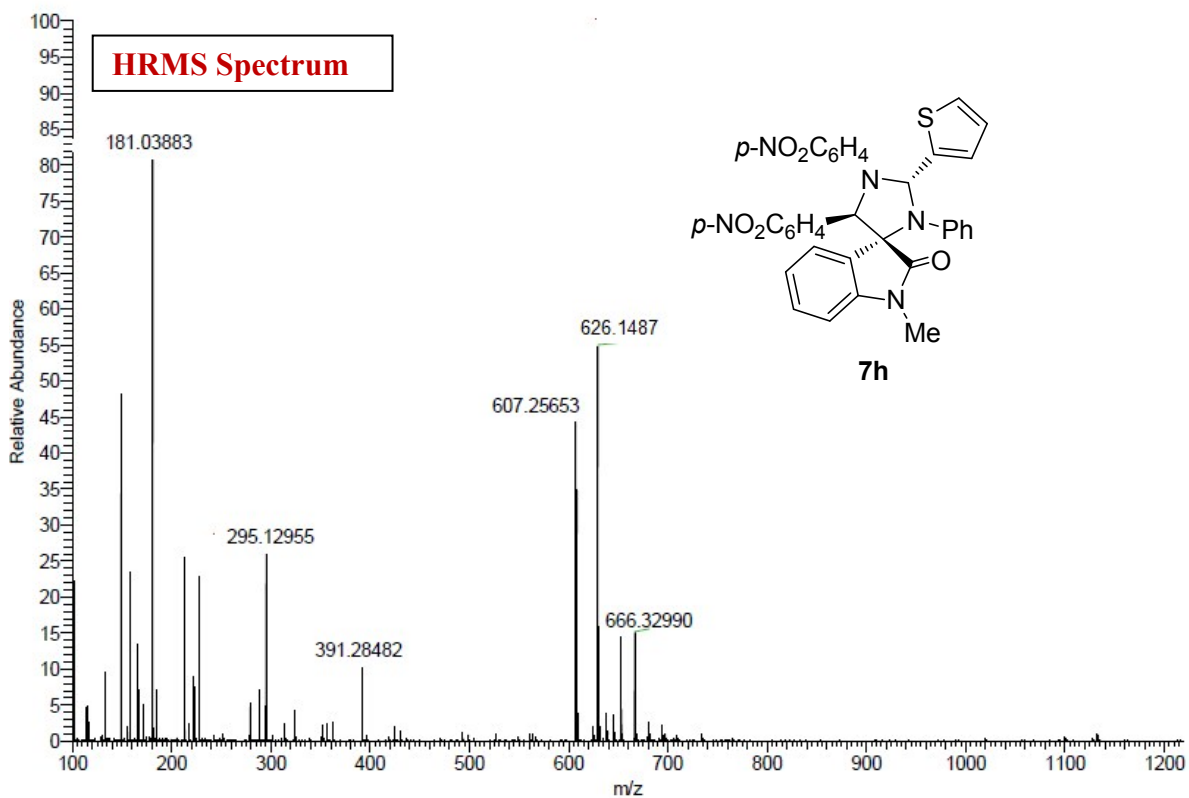

**<sup>1</sup>H NMR (400 MHz, CDCl<sub>3</sub>)**

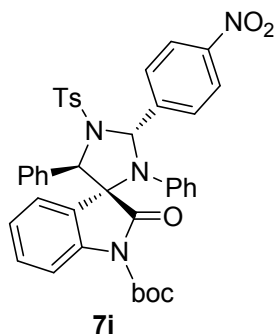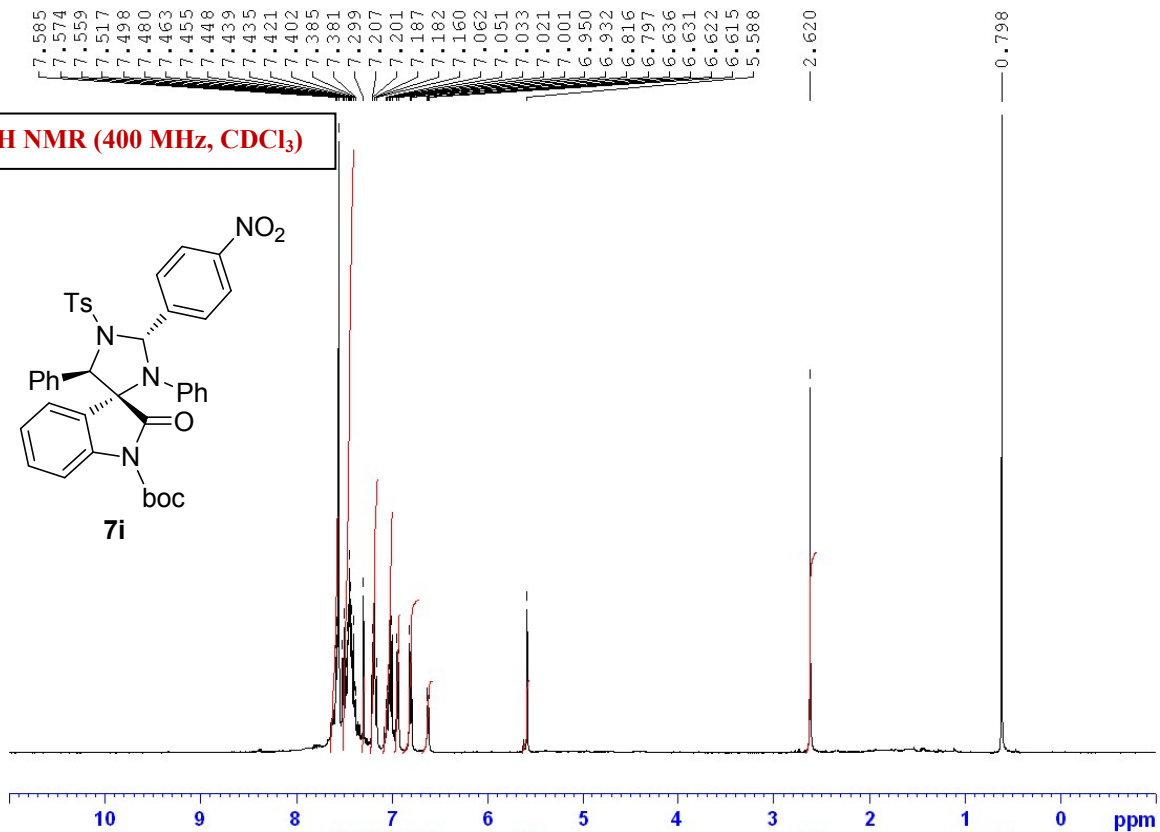

**<sup>13</sup>C NMR (100 MHz, CDCl<sub>3</sub>)**

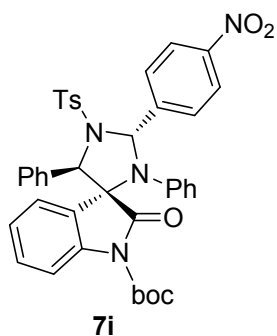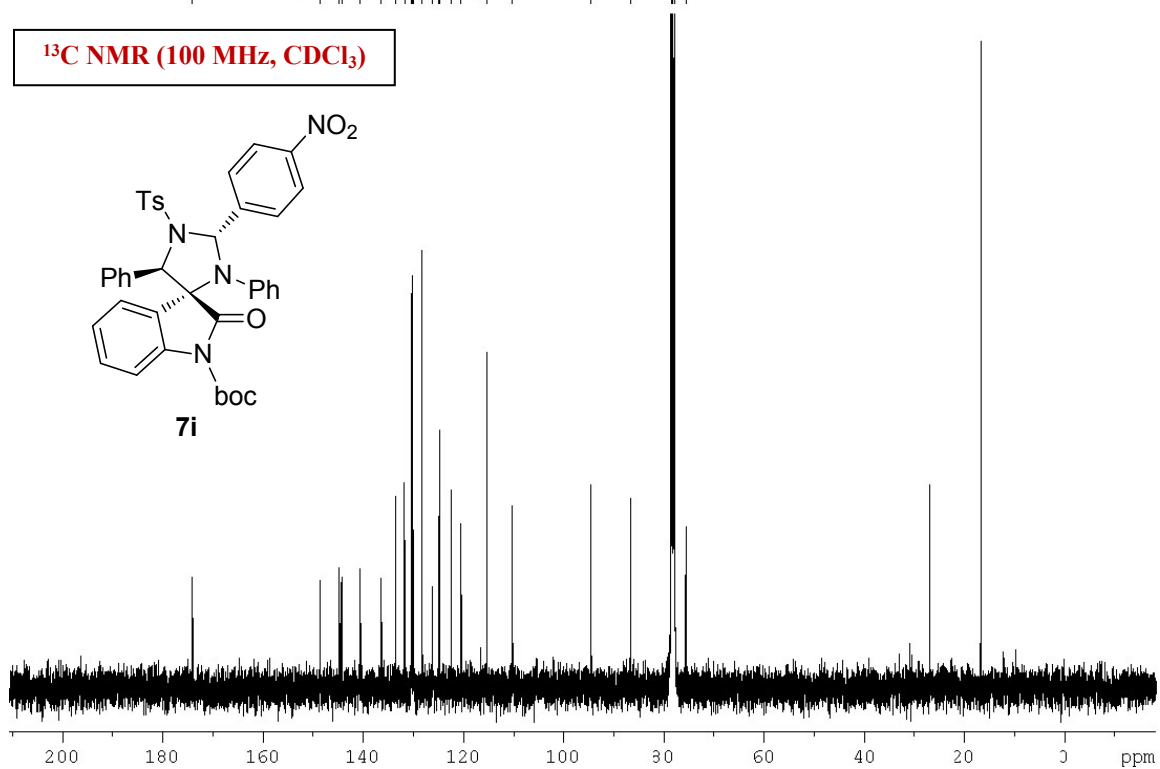

**<sup>13</sup>C DEPT135 NMR (100 MHz, CDCl<sub>3</sub>)**

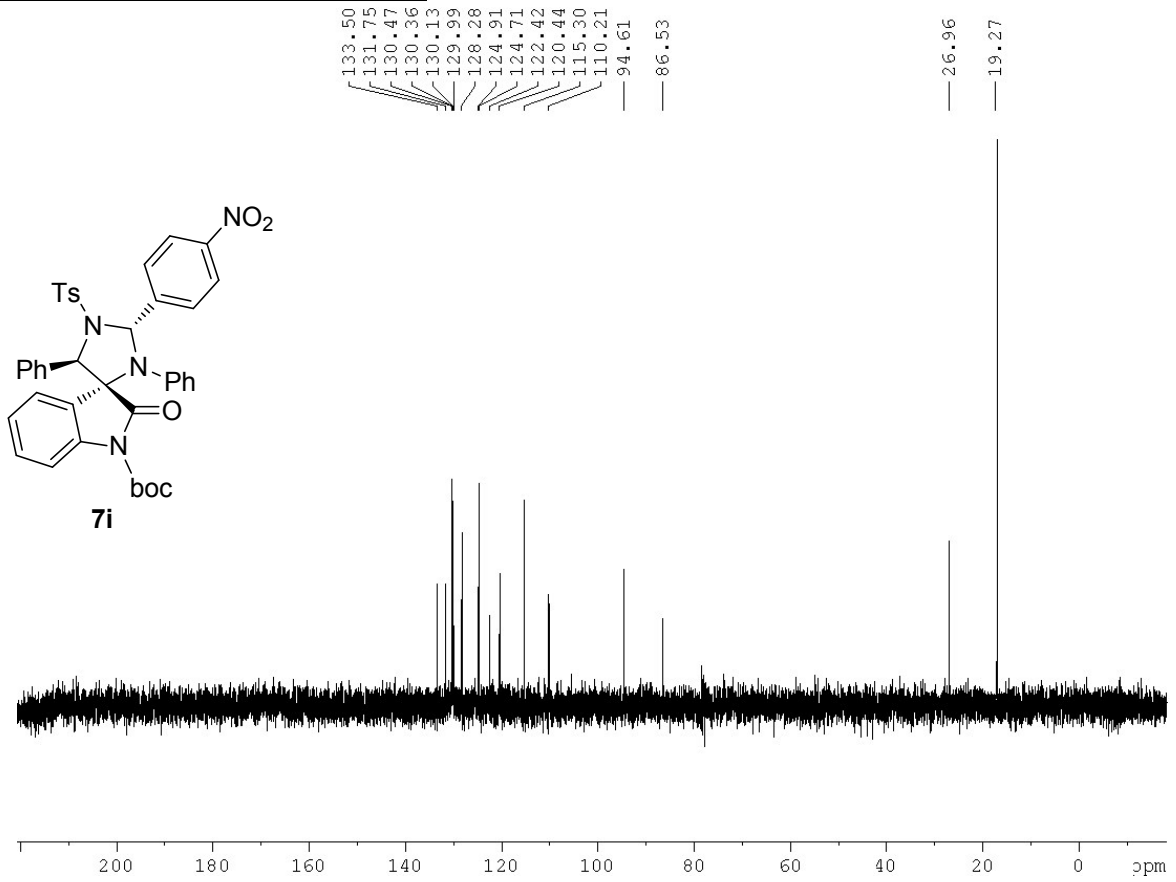

**Acquisition Parameter**

|             |          |                       |           |                  |           |
|-------------|----------|-----------------------|-----------|------------------|-----------|
| Source Type | ESI      | Ion Polarity          | Positive  | Set Nebulizer    | 0.3 Bar   |
| Focus       | Active   | Set Capillary         | 4500 V    | Set Dry Heater   | 190 °C    |
| Scan Begin  | 50 m/z   | Set End Plate Offset  | -500 V    | Set Dry Gas      | 4.0 l/min |
| Scan End    | 1500 m/z | Set Collision Cell RF | 100.0 Vpp | Set Divert Valve | Source    |

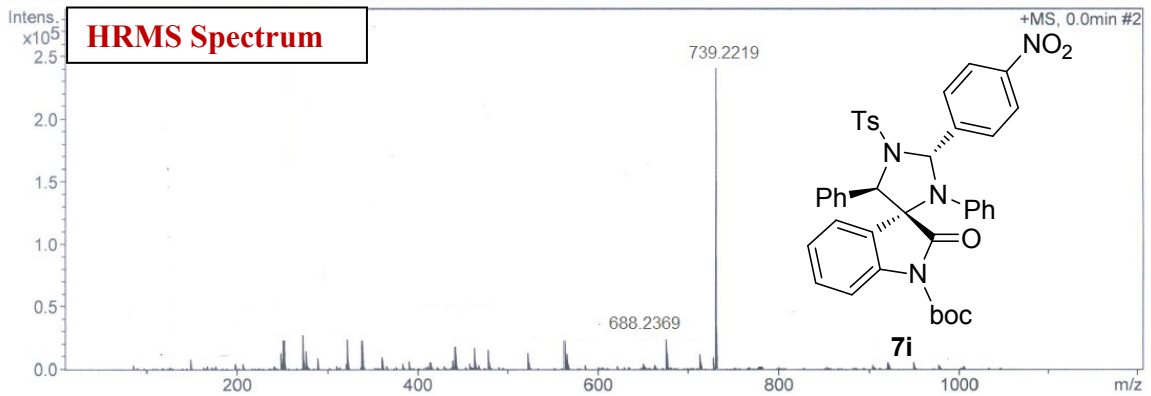

**<sup>1</sup>H NMR (400 MHz, CDCl<sub>3</sub>)**

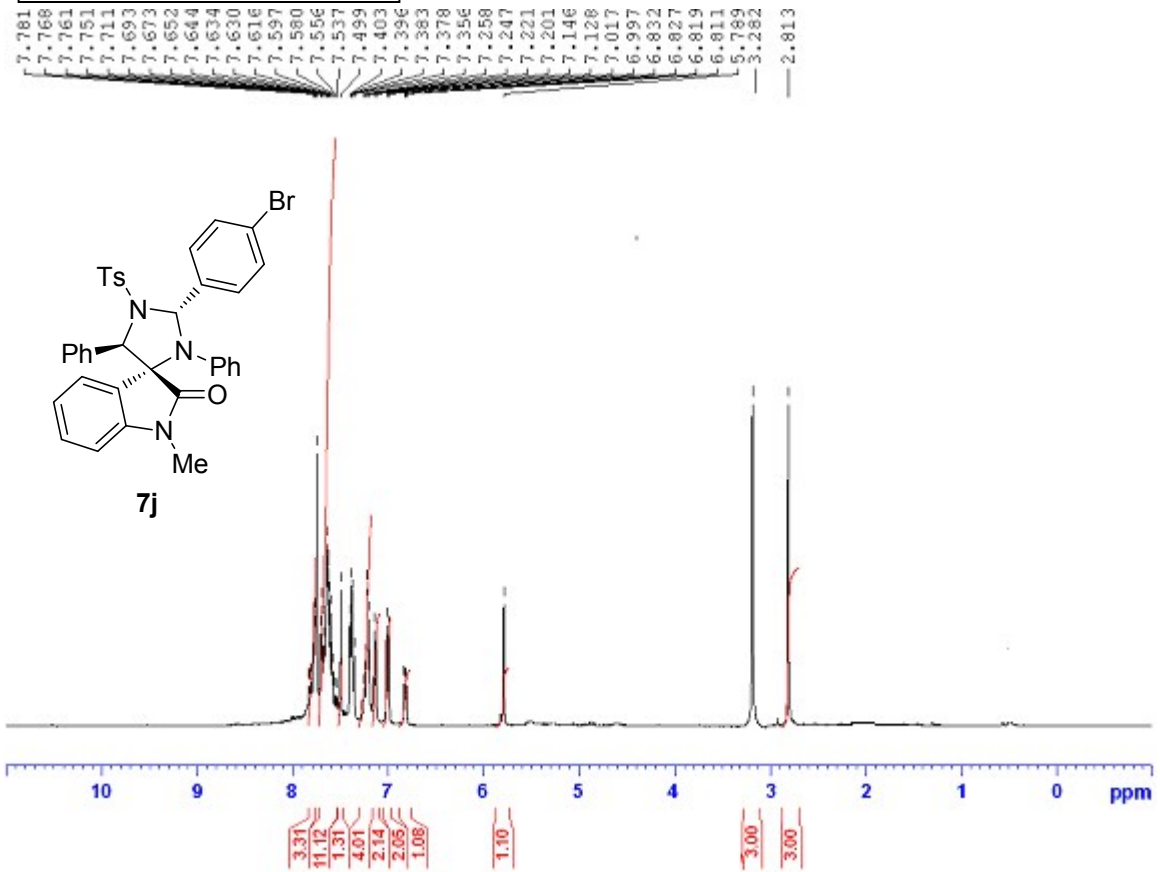

**<sup>13</sup>C NMR (100 MHz, CDCl<sub>3</sub>)**

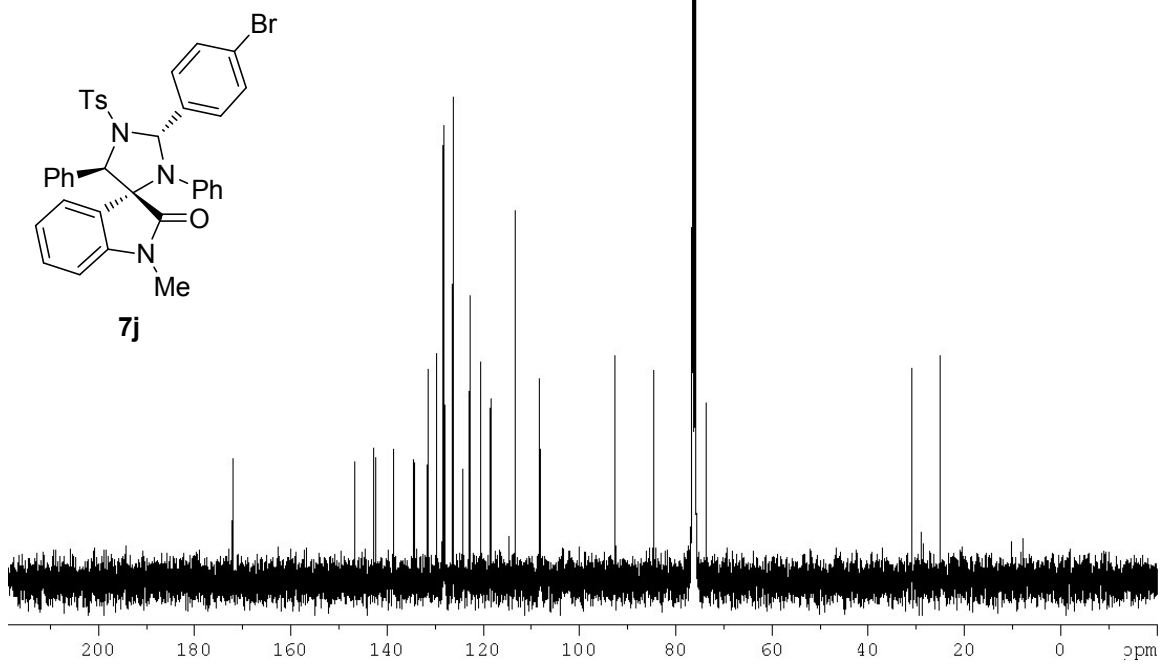



### <sup>13</sup>C DEPT135 NMR (100 MHz, CDCl<sub>3</sub>)

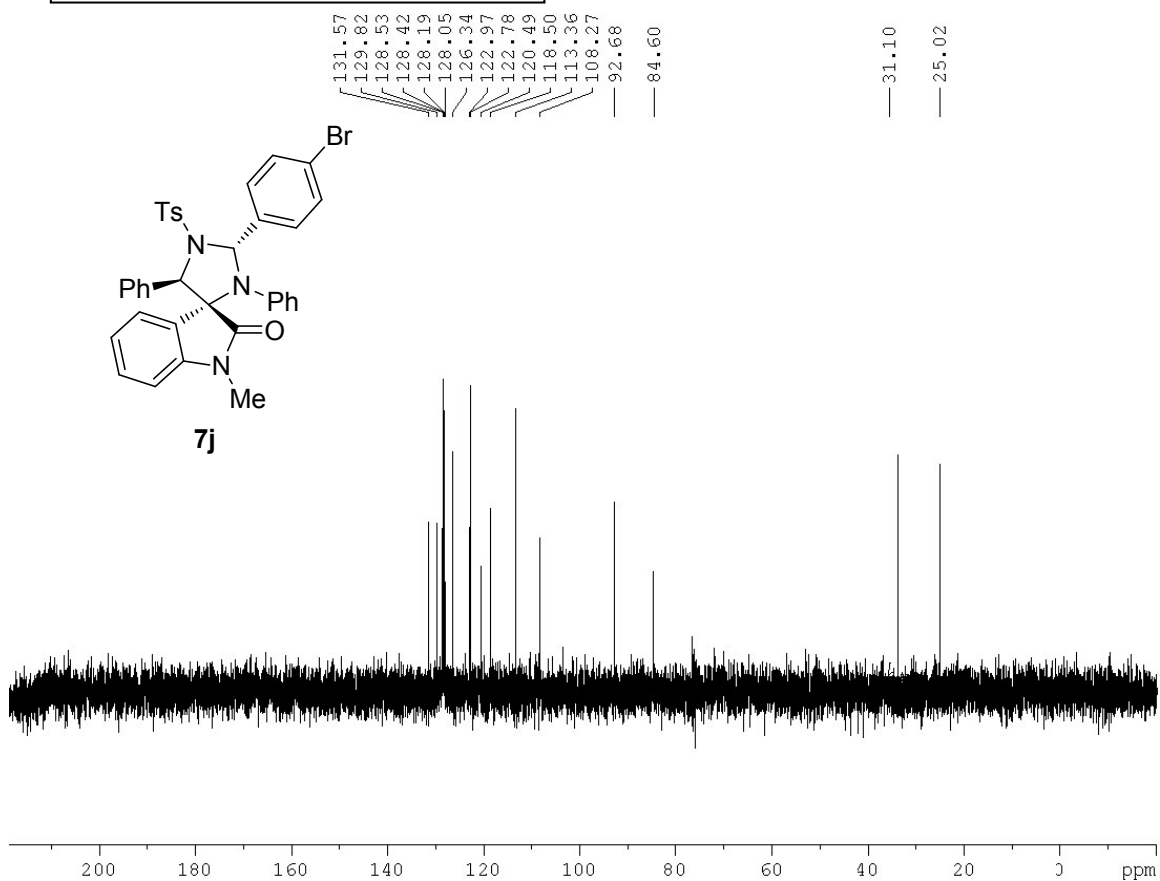

### HRMS Spectrum

#### Acquisition Parameter

|             |            |                       |           |                  |           |
|-------------|------------|-----------------------|-----------|------------------|-----------|
| Source Type | ESI        | Ion Polarity          | Positive  | Set Nebulizer    | 0.3 Bar   |
| Focus       | Not active | Set Capillary         | 4500 V    | Set Dry Heater   | 180 °C    |
| Scan Begin  | 50 m/z     | Set End Plate Offset  | -500 V    | Set Dry Gas      | 4.0 l/min |
| Scan End    | 1500 m/z   | Set Collision Cell RF | 100.0 Vpp | Set Divert Valve | Source    |

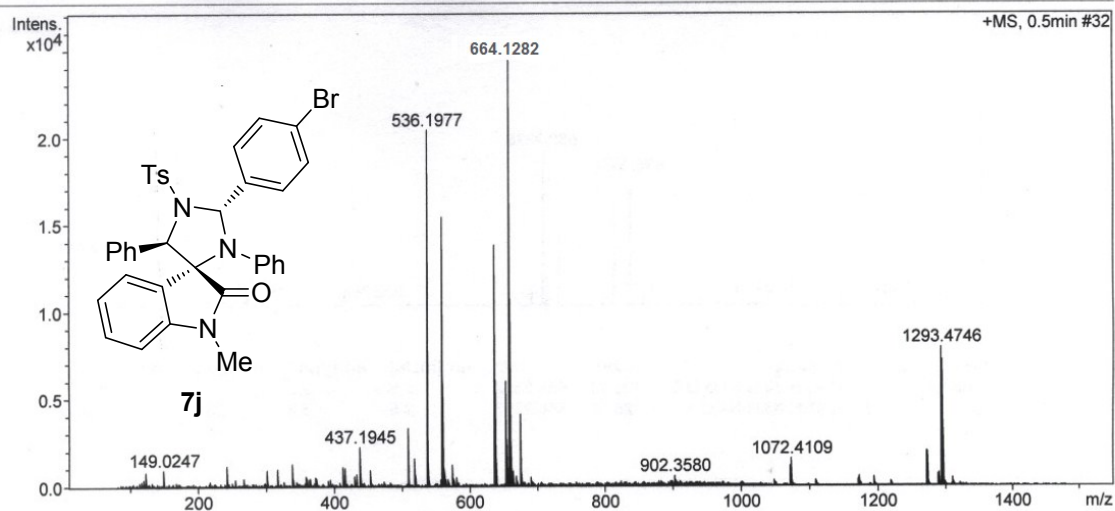

**<sup>1</sup>H NMR (400 MHz, CDCl<sub>3</sub>)**

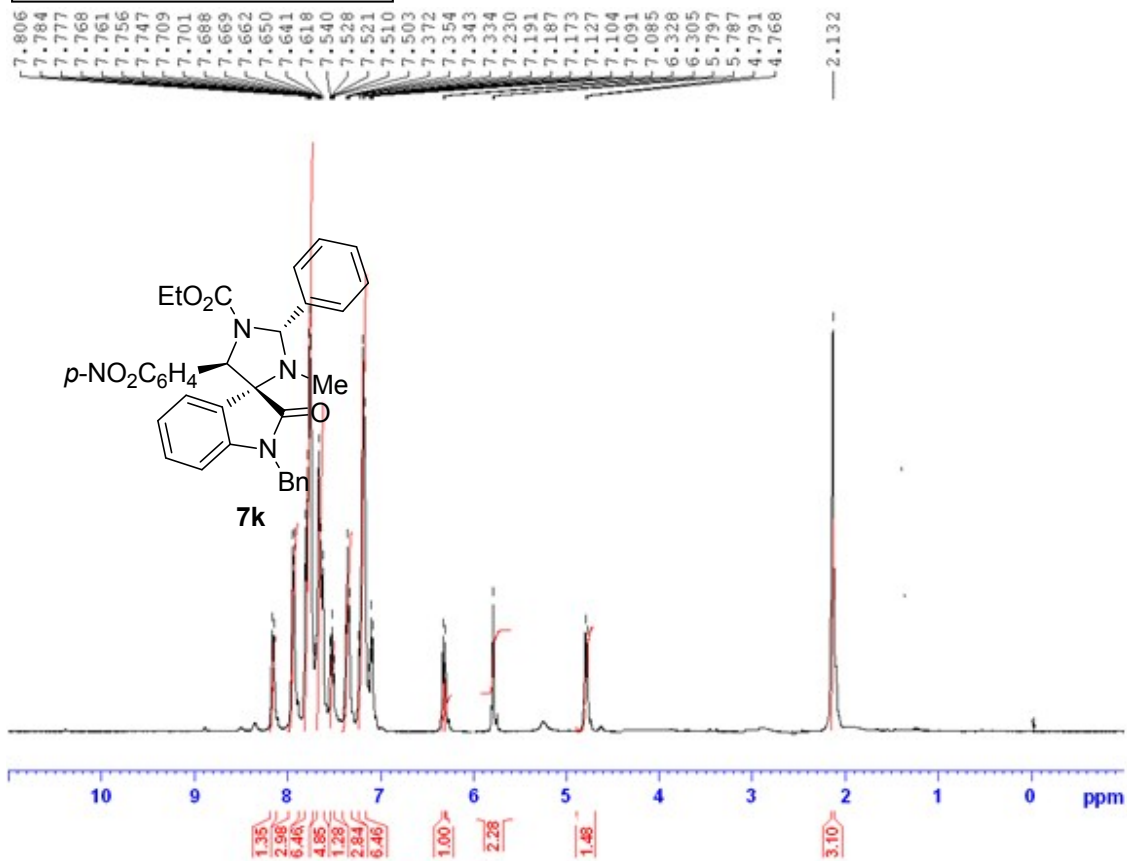

**<sup>13</sup>C NMR (100 MHz, CDCl<sub>3</sub>)**

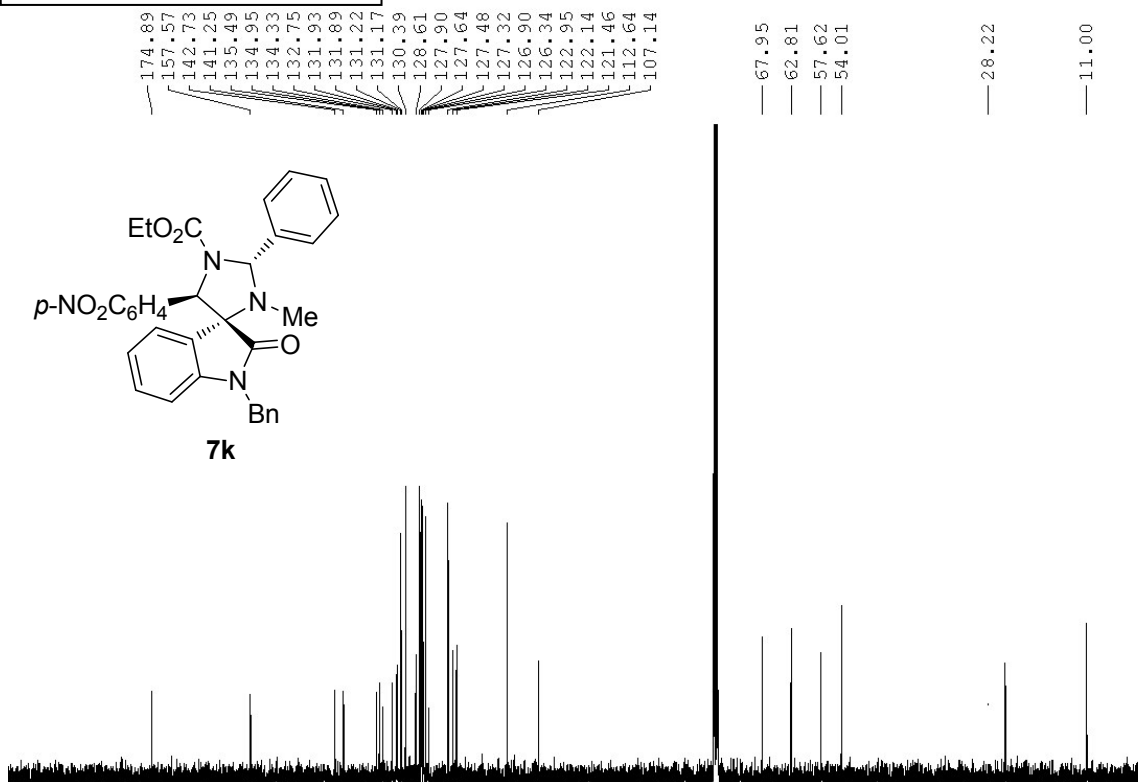

### <sup>13</sup>C DEPT135 NMR (100 MHz, CDCl<sub>3</sub>)

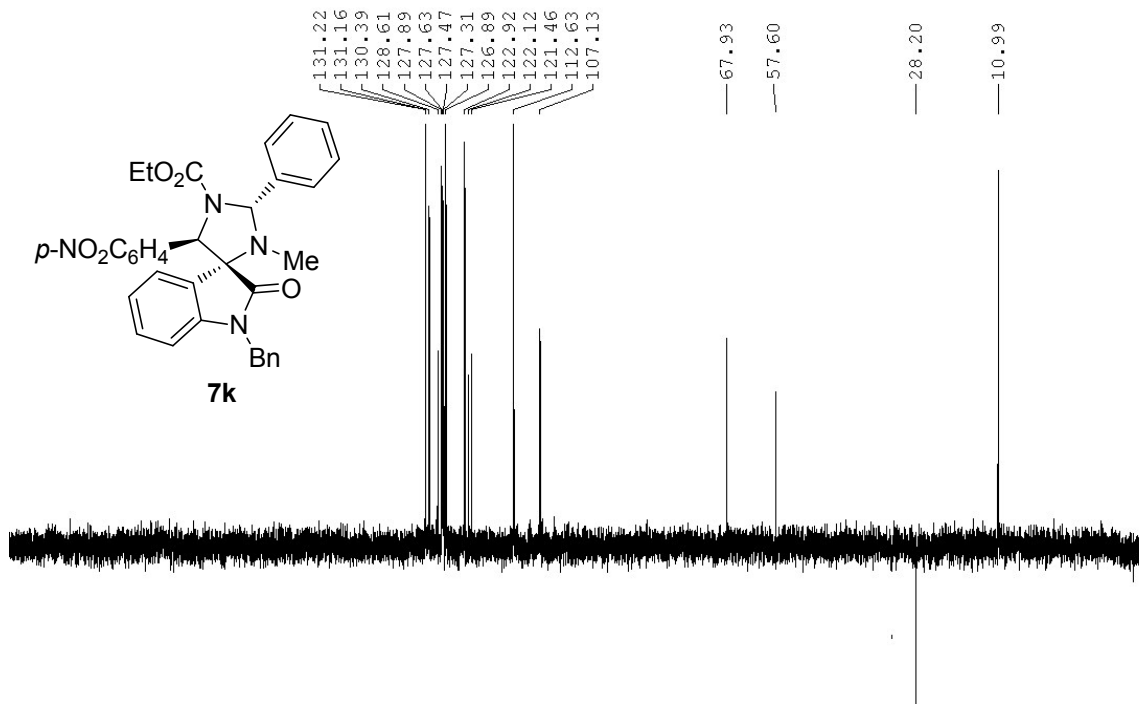

### HRMS Spectrum

#### Acquisition Parameter

|             |            |                       |           |                  |           |
|-------------|------------|-----------------------|-----------|------------------|-----------|
| Source Type | ESI        | Ion Polarity          | Positive  | Set Nebulizer    | 0.3 Bar   |
| Focus       | Not active | Set Capillary         | 4500 V    | Set Dry Heater   | 180 °C    |
| Scan Begin  | 50 m/z     | Set End Plate Offset  | -500 V    | Set Dry Gas      | 4.0 l/min |
| Scan End    | 1500 m/z   | Set Collision Cell RF | 100.0 Vpp | Set Divert Valve | Source    |

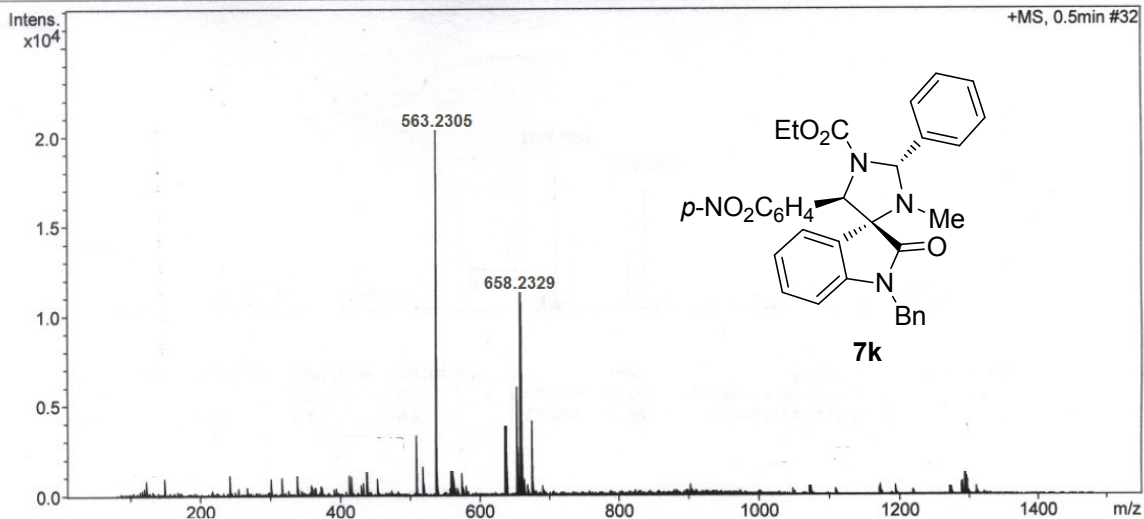

**<sup>1</sup>H NMR (100 MHz, CDCl<sub>3</sub>)**

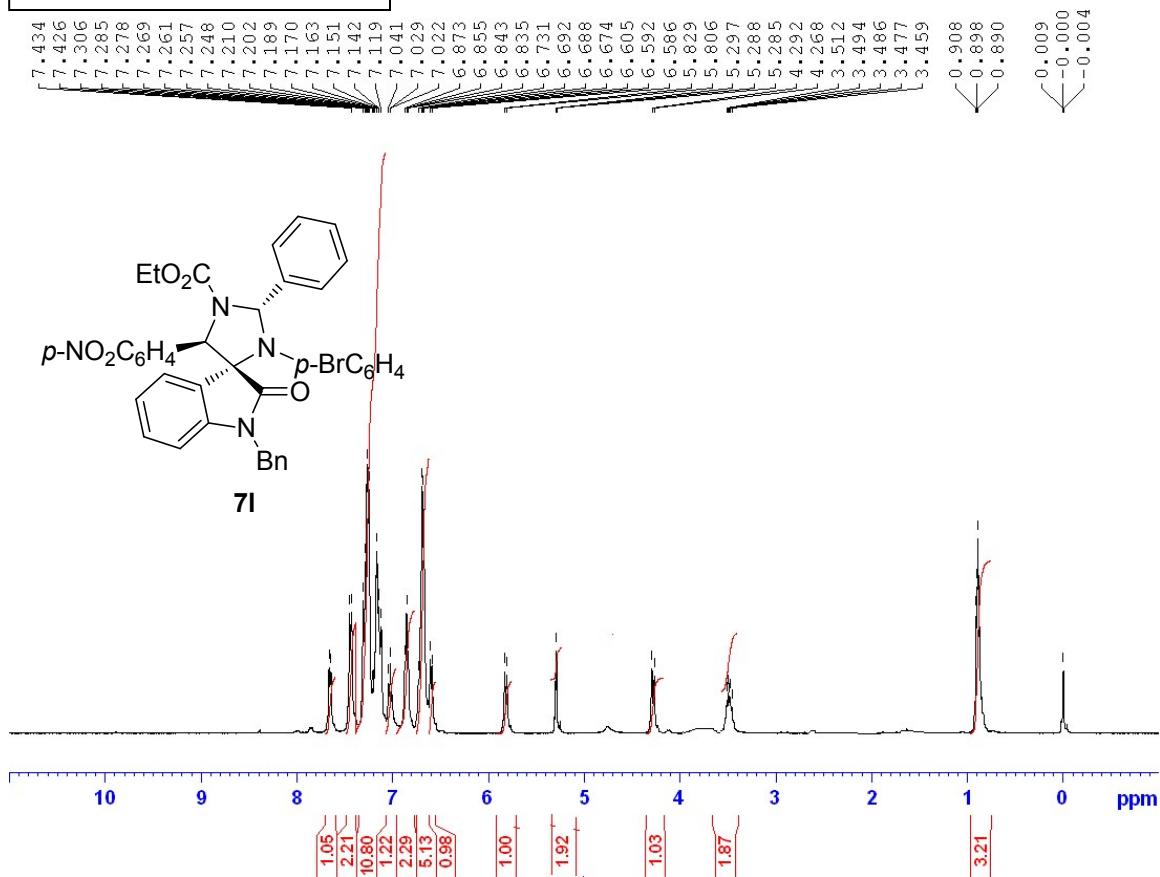

**<sup>13</sup>C NMR (100 MHz, CDCl<sub>3</sub>)**

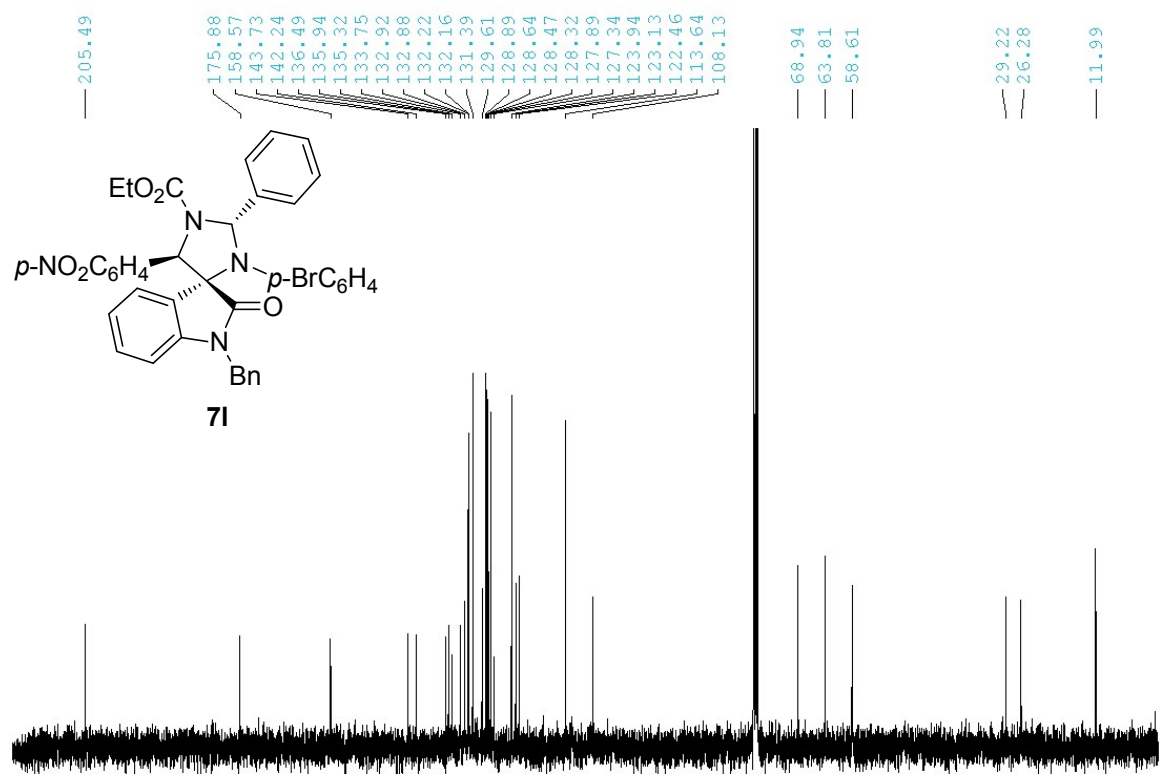

**<sup>13</sup>C DEPT135 NMR (100 MHz, CDCl<sub>3</sub>)**

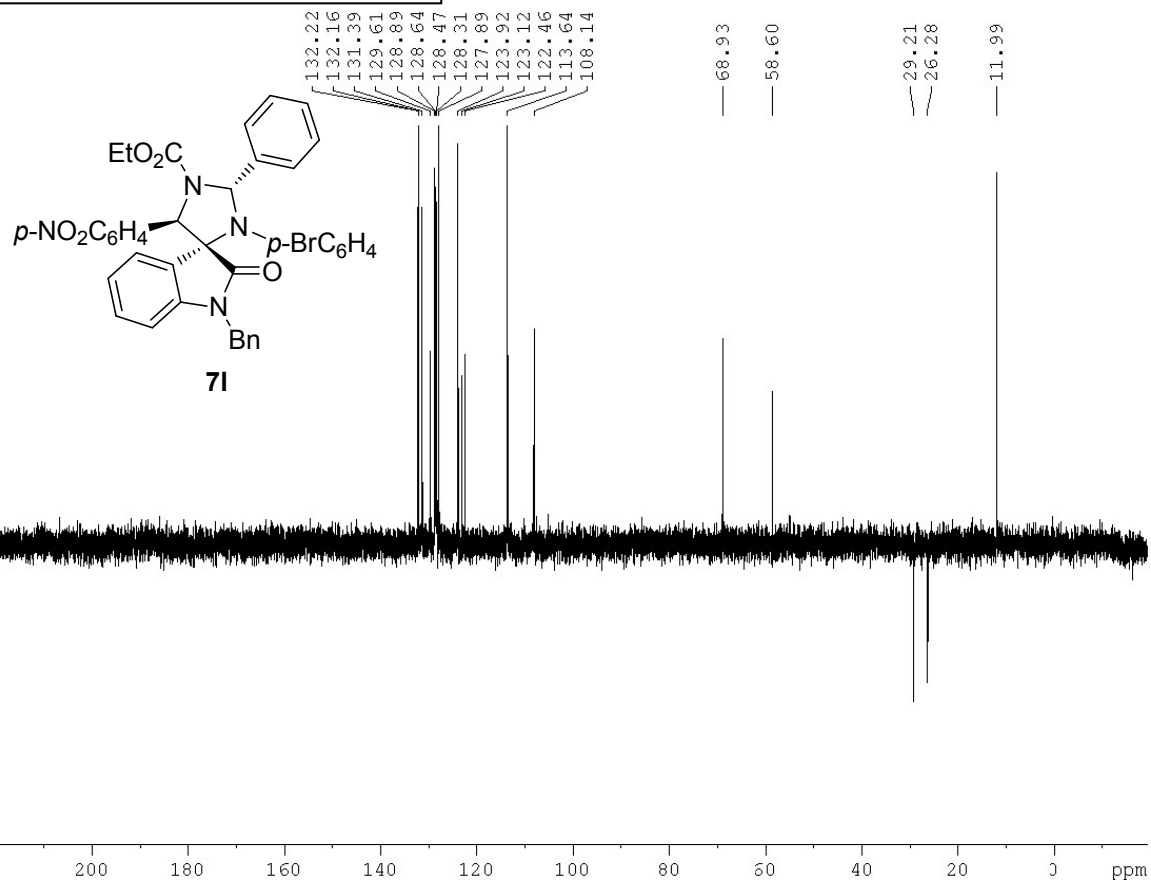

**HRMS Spectrum**

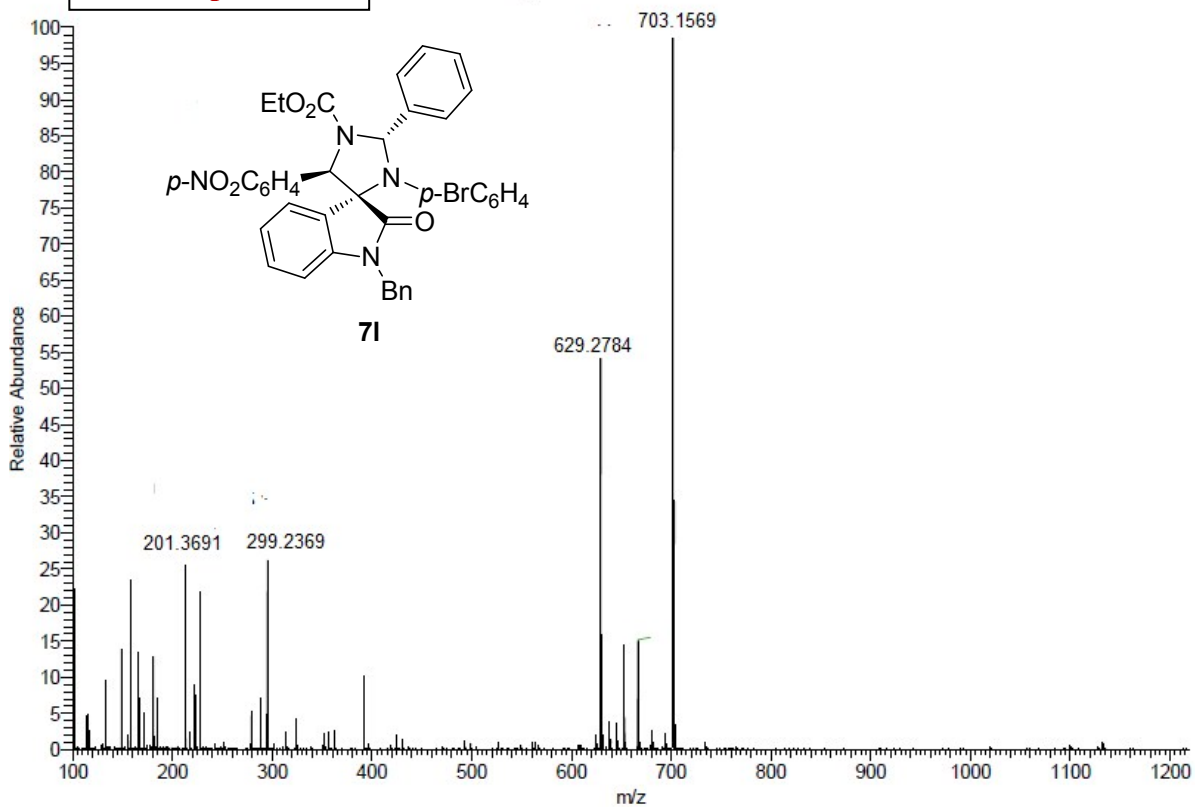

**<sup>1</sup>H, <sup>13</sup>C, DEPT135 NMR and HRMS spectra of spiroindolotriazolines**

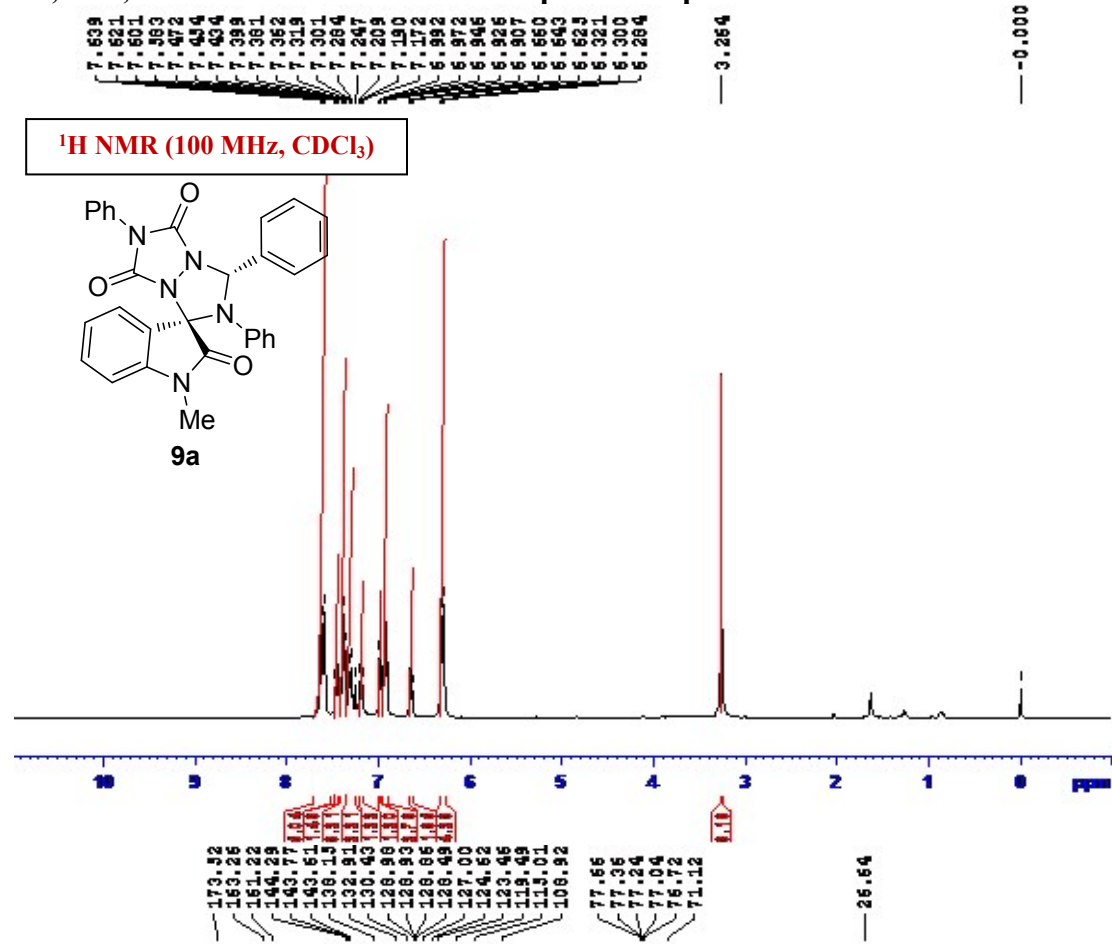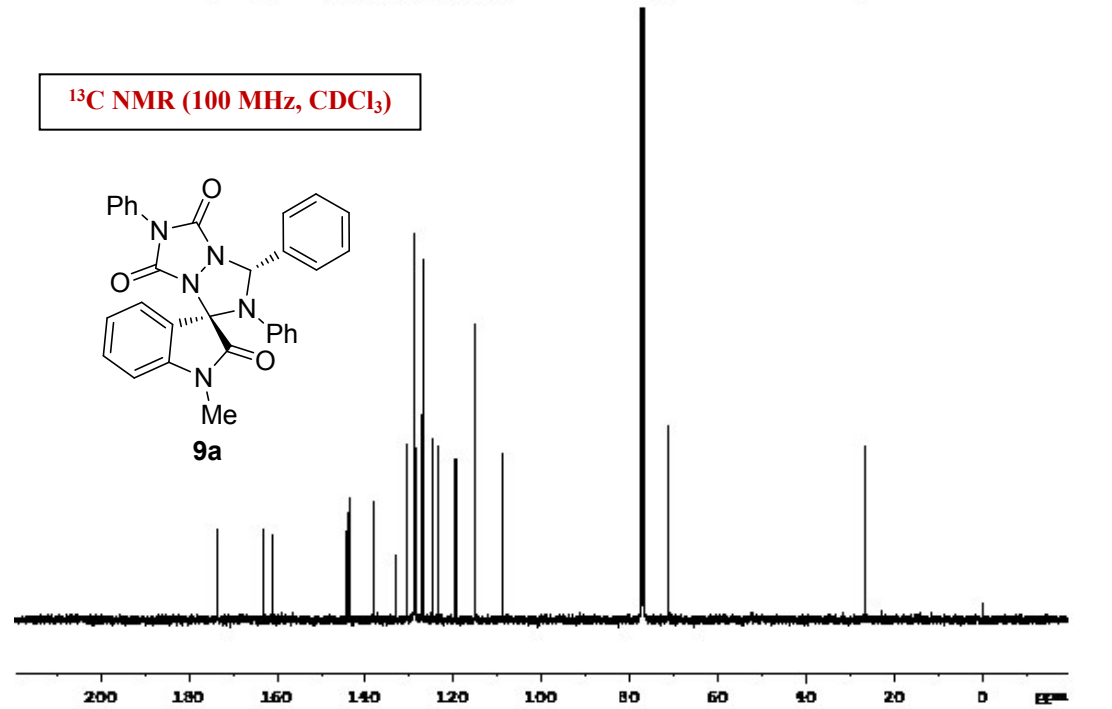

**<sup>13</sup>C DEPT135 NMR (100 MHz, CDCl<sub>3</sub>)**

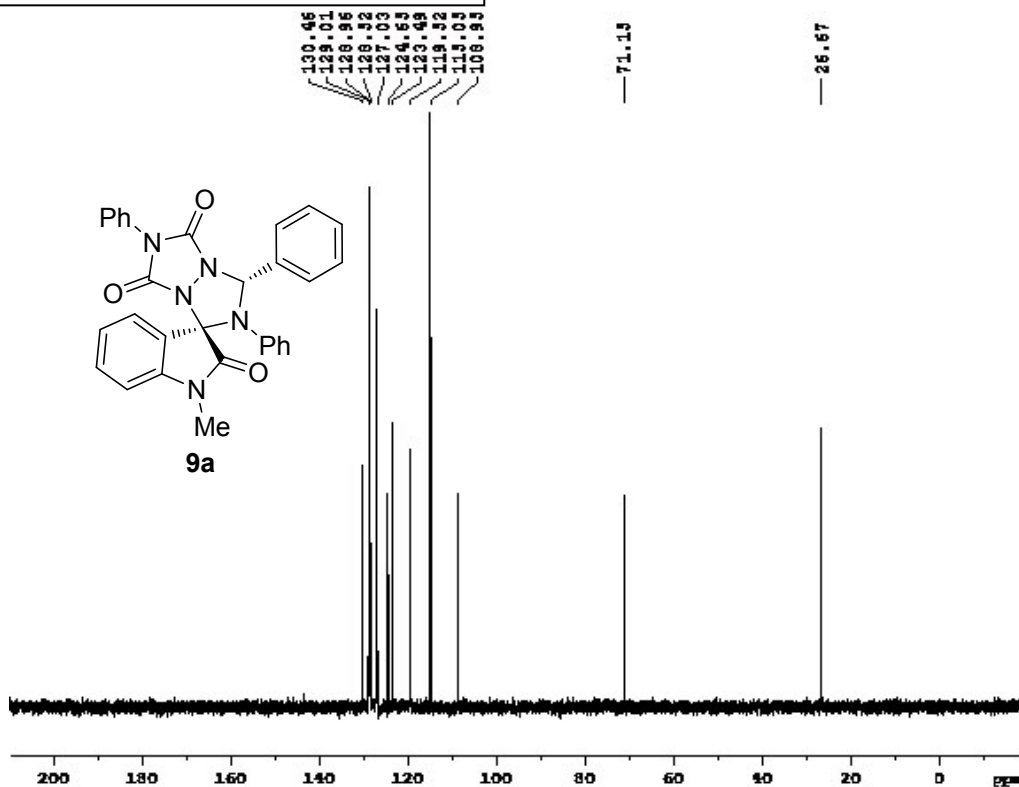

C:\xcalbur\... \SMSGK-293

15-01-2014 14:47:22

SMSGK-293 #61-73 RT: 0.87-1.03 AV: 13 SB: 322 0.03-0.84, 1.15-4.95 NL: 8.87E6  
T: FTMS (1,1) + p ESI Full lock ms [100.00-2000.00]

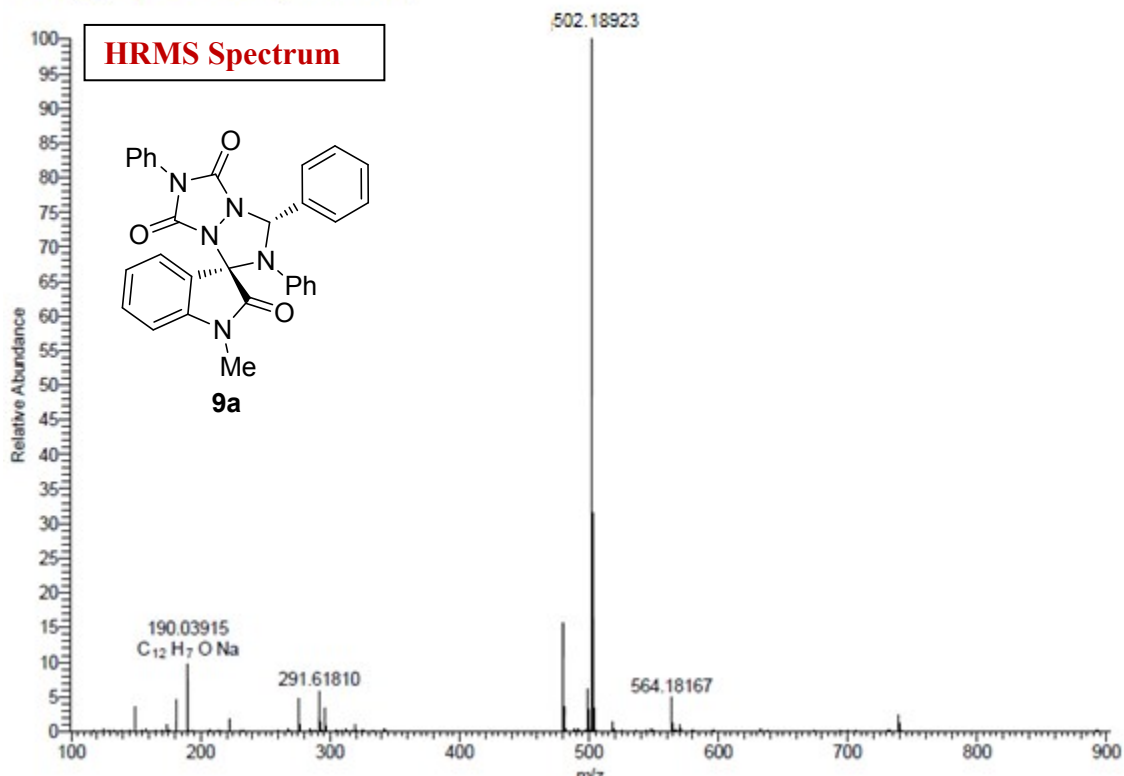

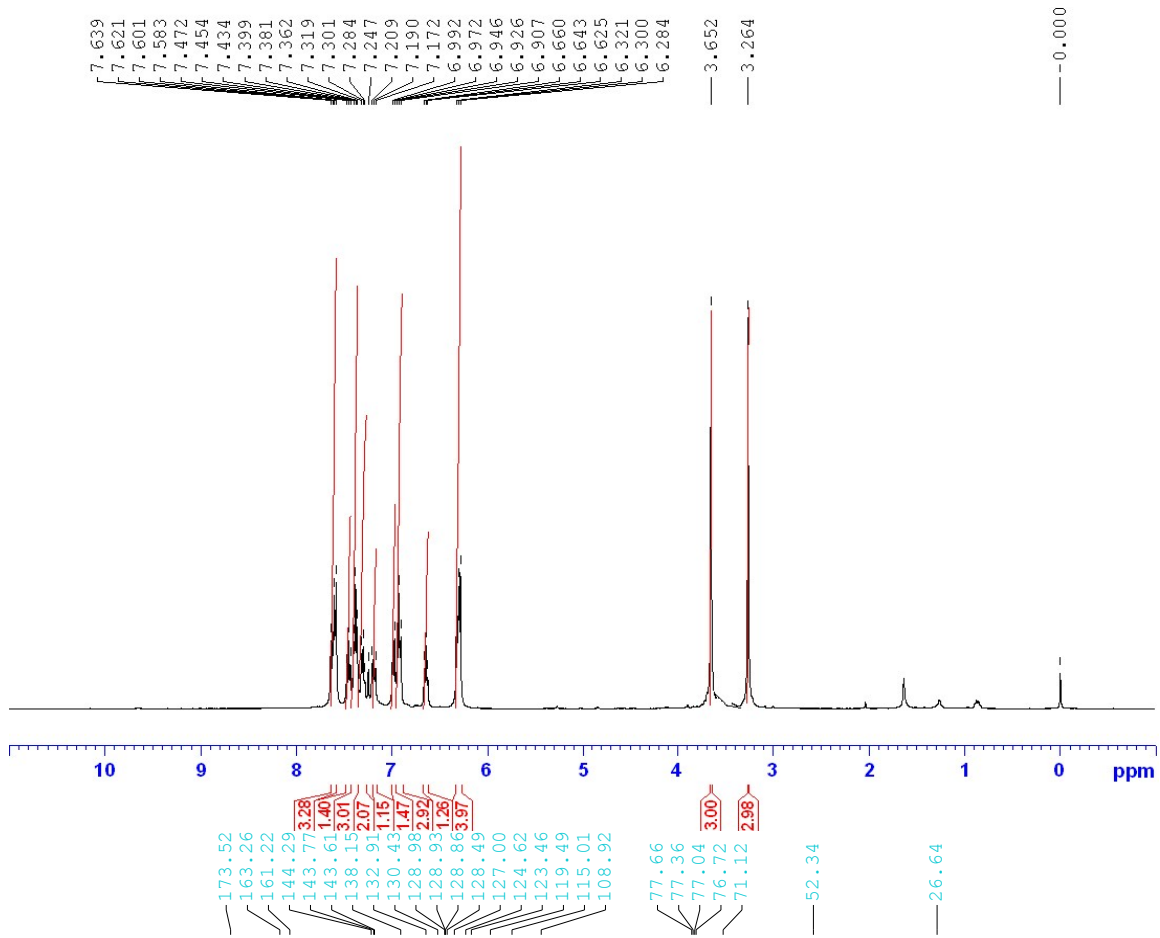

**<sup>13</sup>C NMR (100 MHz, CDCl<sub>3</sub>)**

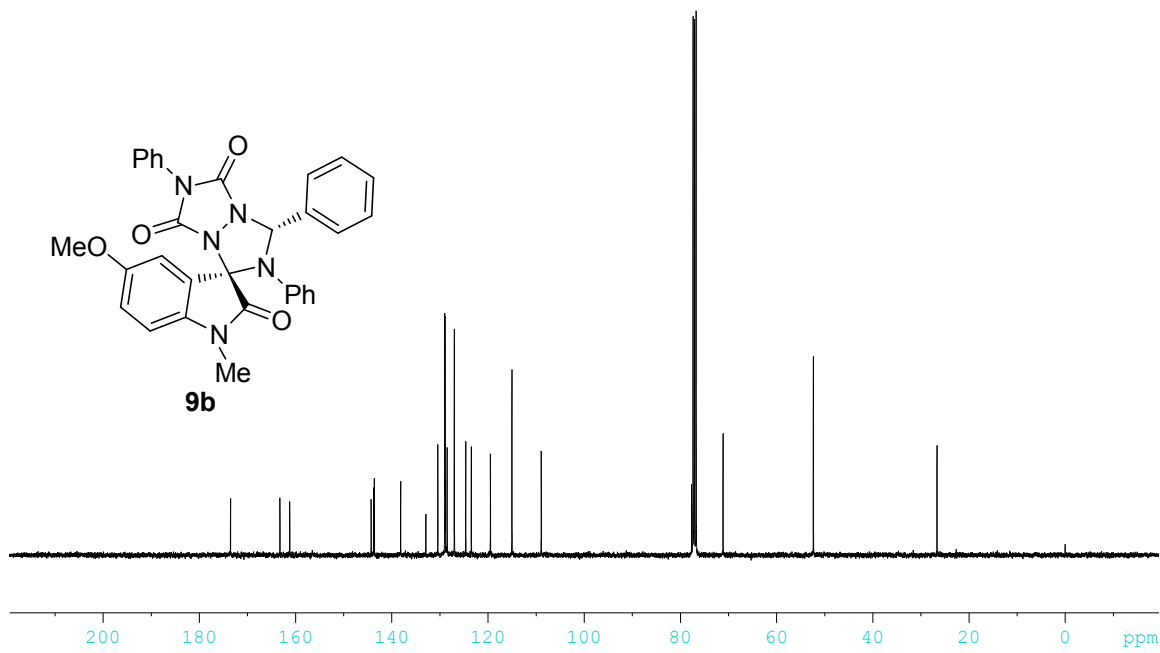



**<sup>13</sup>C DEPT135 NMR (100 MHz, CDCl<sub>3</sub>)**

130.46  
129.01  
128.96  
128.70  
128.52  
127.03  
124.65  
123.49  
119.52  
115.05  
108.95

71.15

52.37

26.67

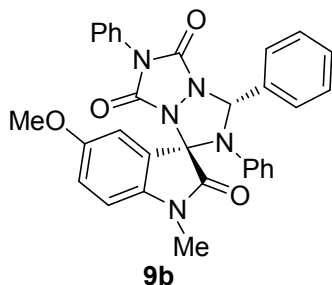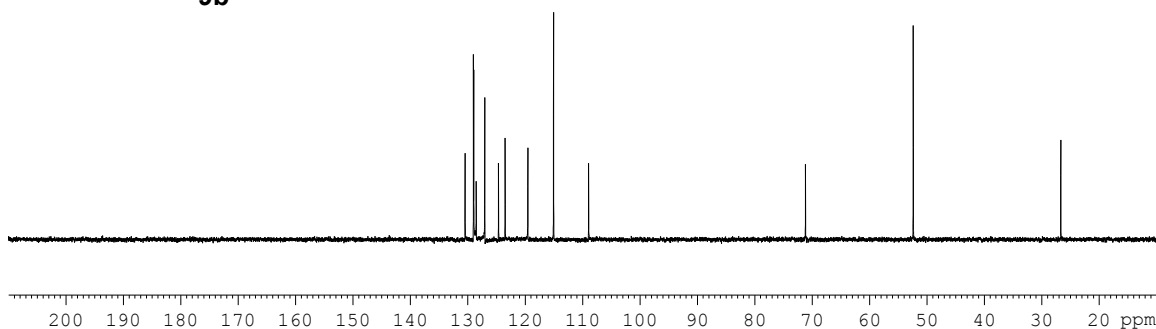

**Acquisition Parameter**

|             |            |                       |           |                  |           |
|-------------|------------|-----------------------|-----------|------------------|-----------|
| Source Type | ESI        | Ion Polarity          | Positive  | Set Nebulizer    | 0.3 Bar   |
| Focus       | Not active | Set Capillary         | 4500 V    | Set Dry Heater   | 180 °C    |
| Scan Begin  | 50 m/z     | Set End Plate Offset  | -500 V    | Set Dry Gas      | 4.0 l/min |
| Scan End    | 1500 m/z   | Set Collision Cell RF | 100.0 Vpp | Set Divert Valve | Source    |

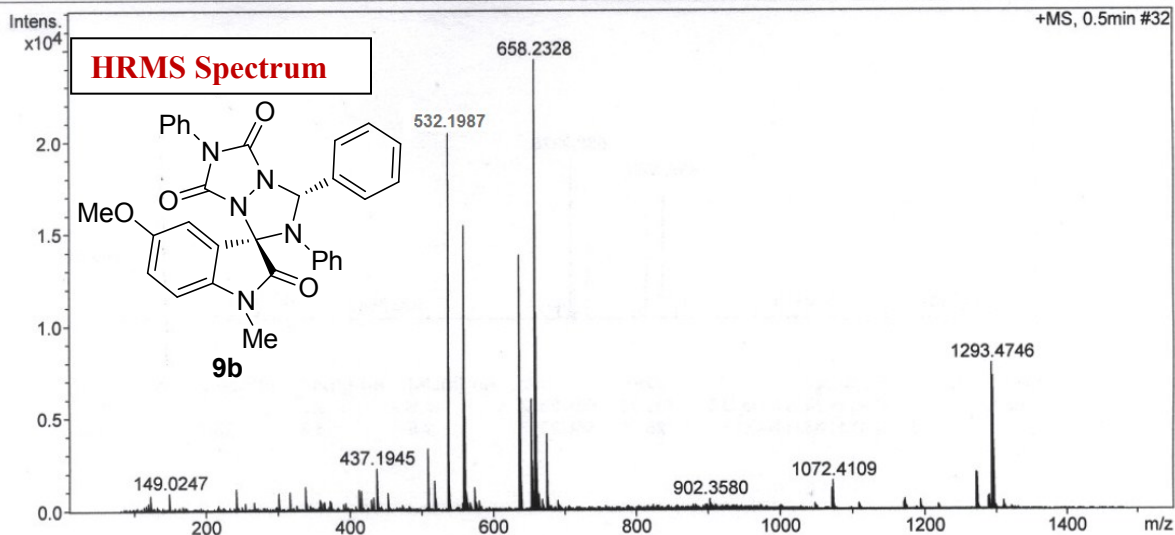

7.629  
7.612  
7.521  
7.499  
7.453  
7.450  
7.434  
7.414  
7.412  
7.249  
7.189  
7.187  
7.170  
7.150  
6.992  
6.972  
6.937  
6.915  
6.896  
6.893  
6.657  
6.639  
6.621  
6.349  
6.328  
6.226  
3.885  
3.867  
3.849  
3.831  
3.813  
3.801  
3.796  
3.779  
3.764  
3.746  
3.729  
3.710  
1.260  
1.242  
1.224  
-0.000

**<sup>1</sup>H NMR (100 MHz, CDCl<sub>3</sub>)**

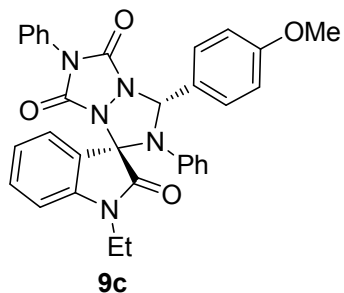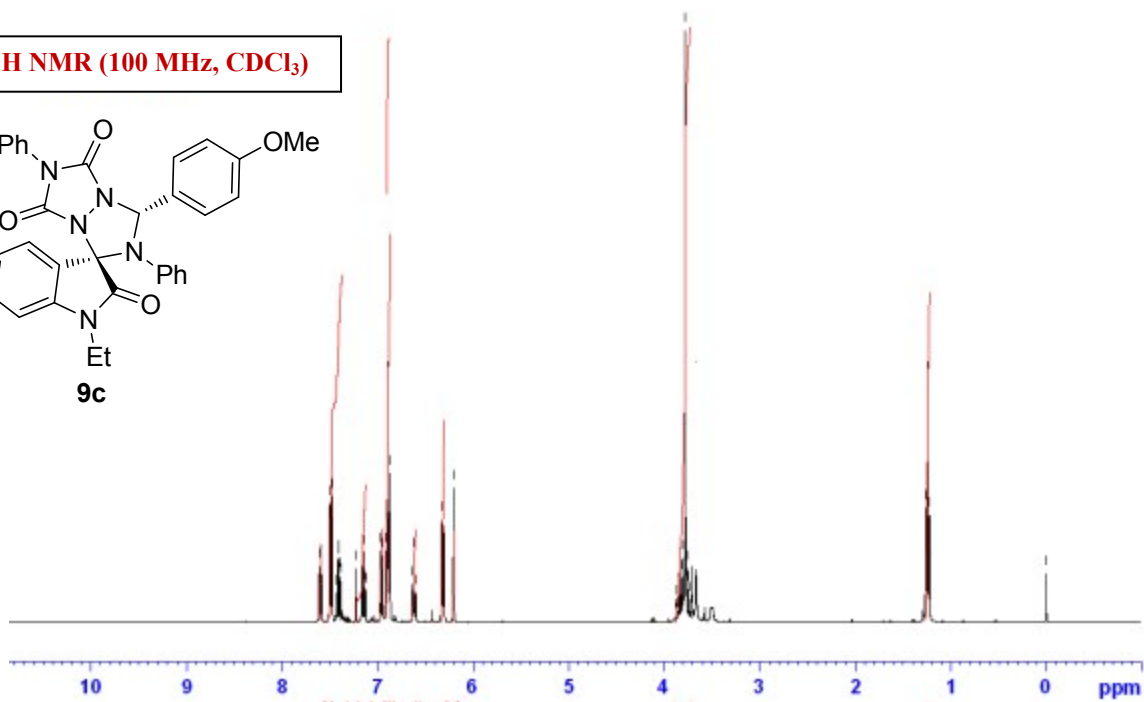

**<sup>13</sup>C NMR (100 MHz, CDCl<sub>3</sub>)**

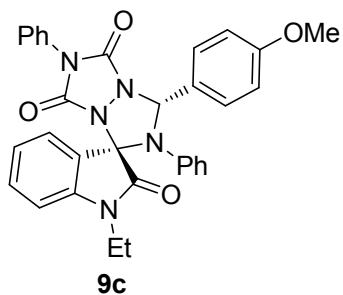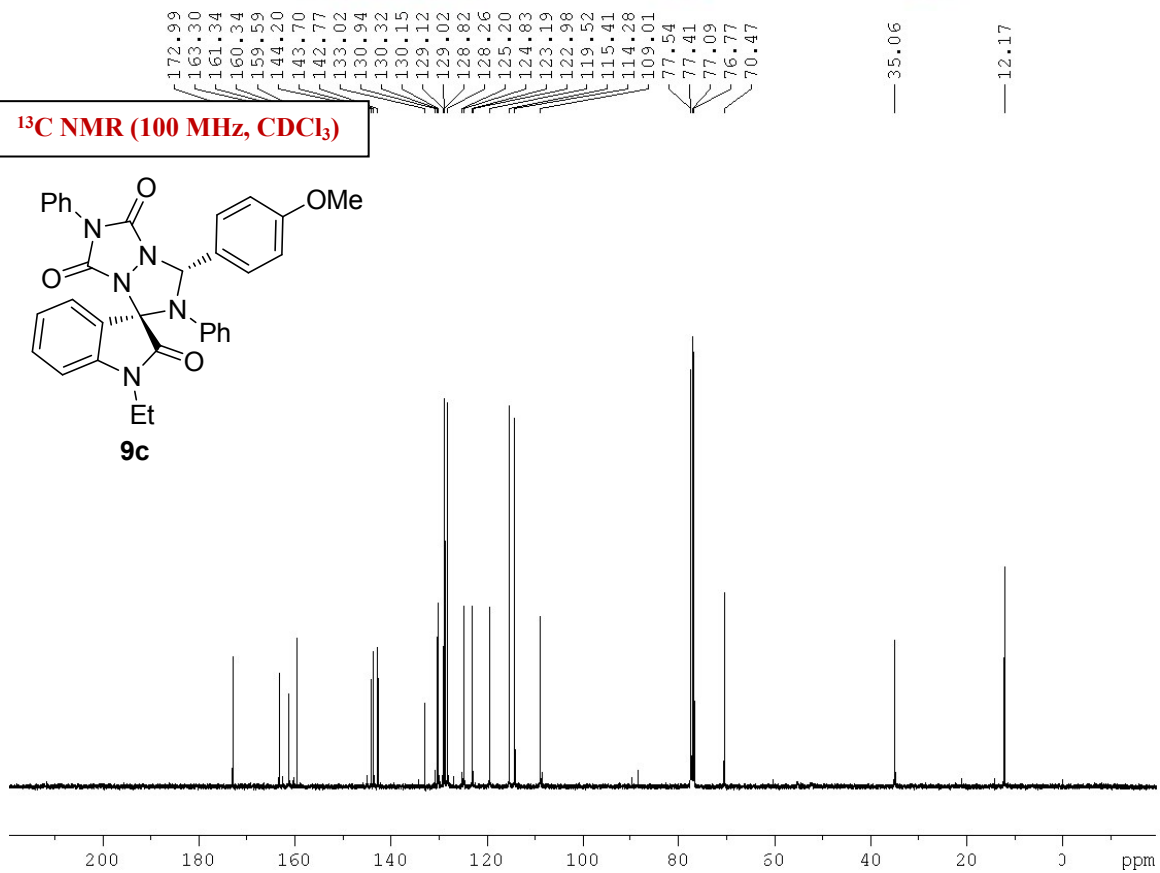

### <sup>13</sup>C DEPT135 NMR (100 MHz, CDCl<sub>3</sub>)

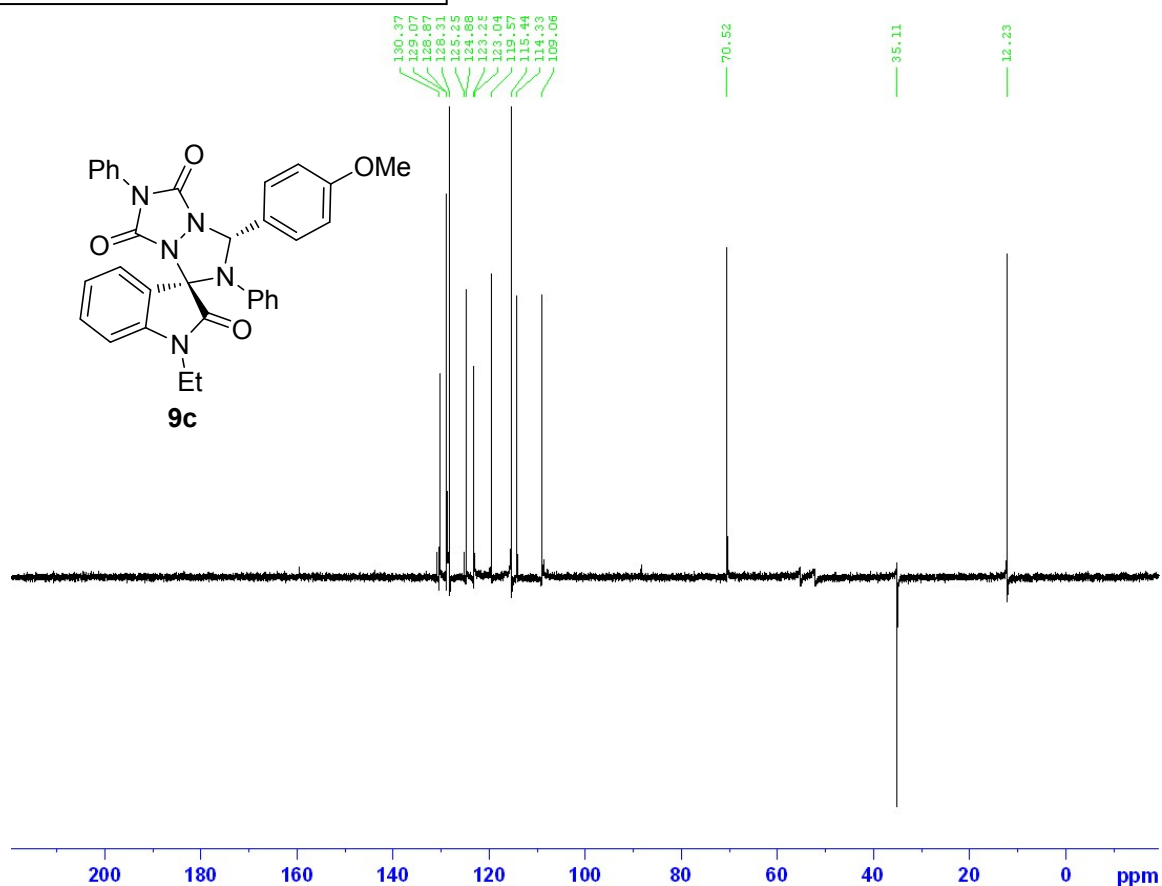

### HRMS Spectrum

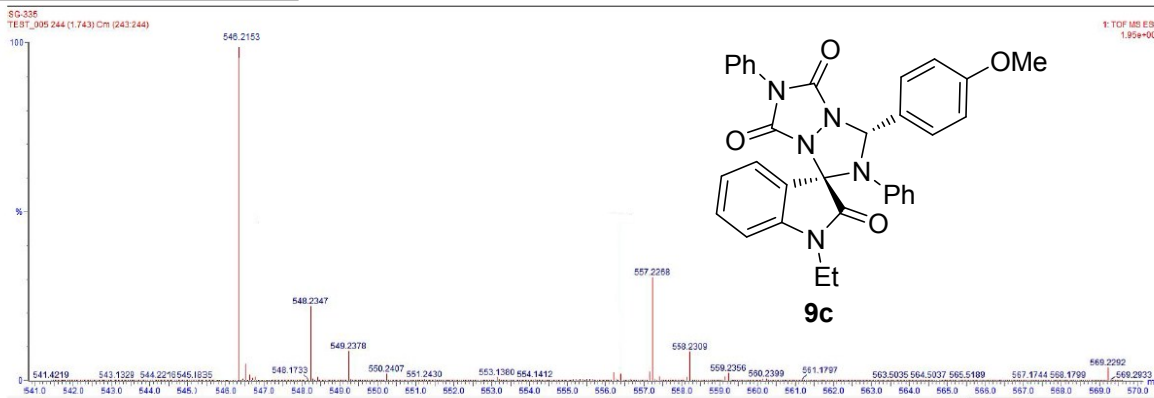

**<sup>1</sup>H NMR (100 MHz, CDCl<sub>3</sub>)**

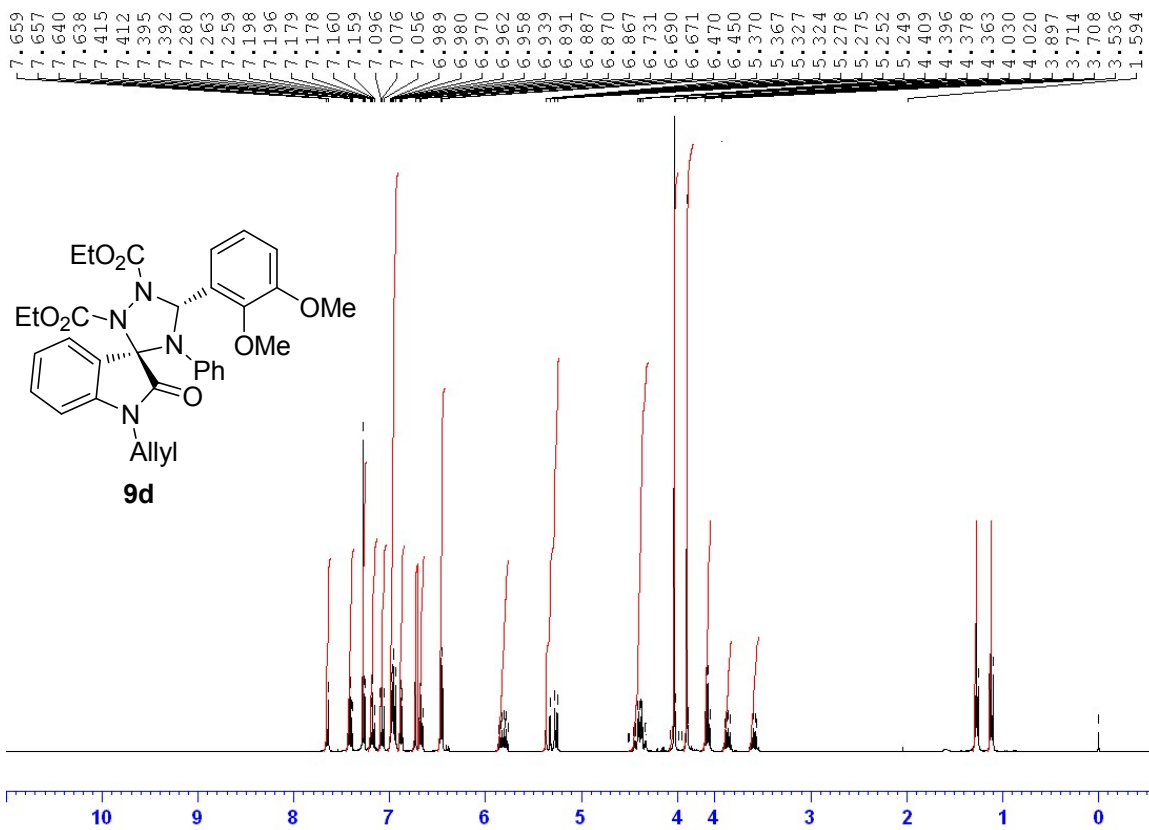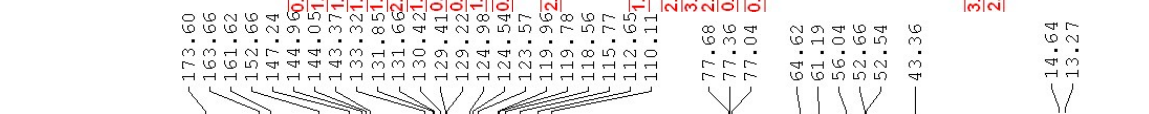

**<sup>13</sup>C NMR (100 MHz, CDCl<sub>3</sub>)**

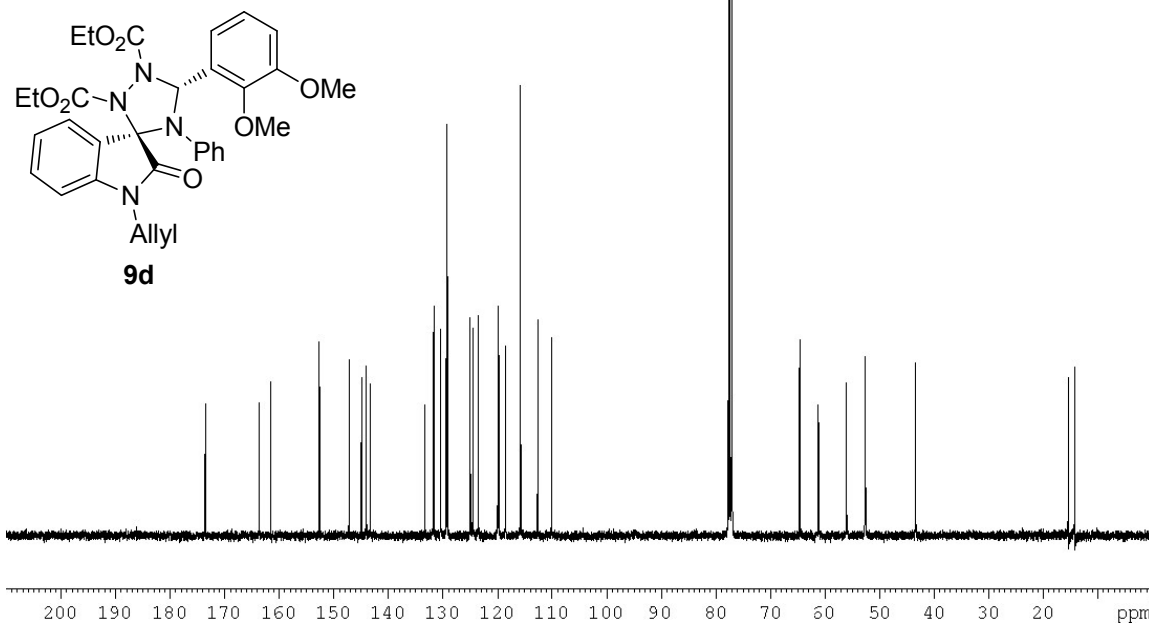

**<sup>13</sup>C DEPT135 NMR (100 MHz, CDCl<sub>3</sub>)**

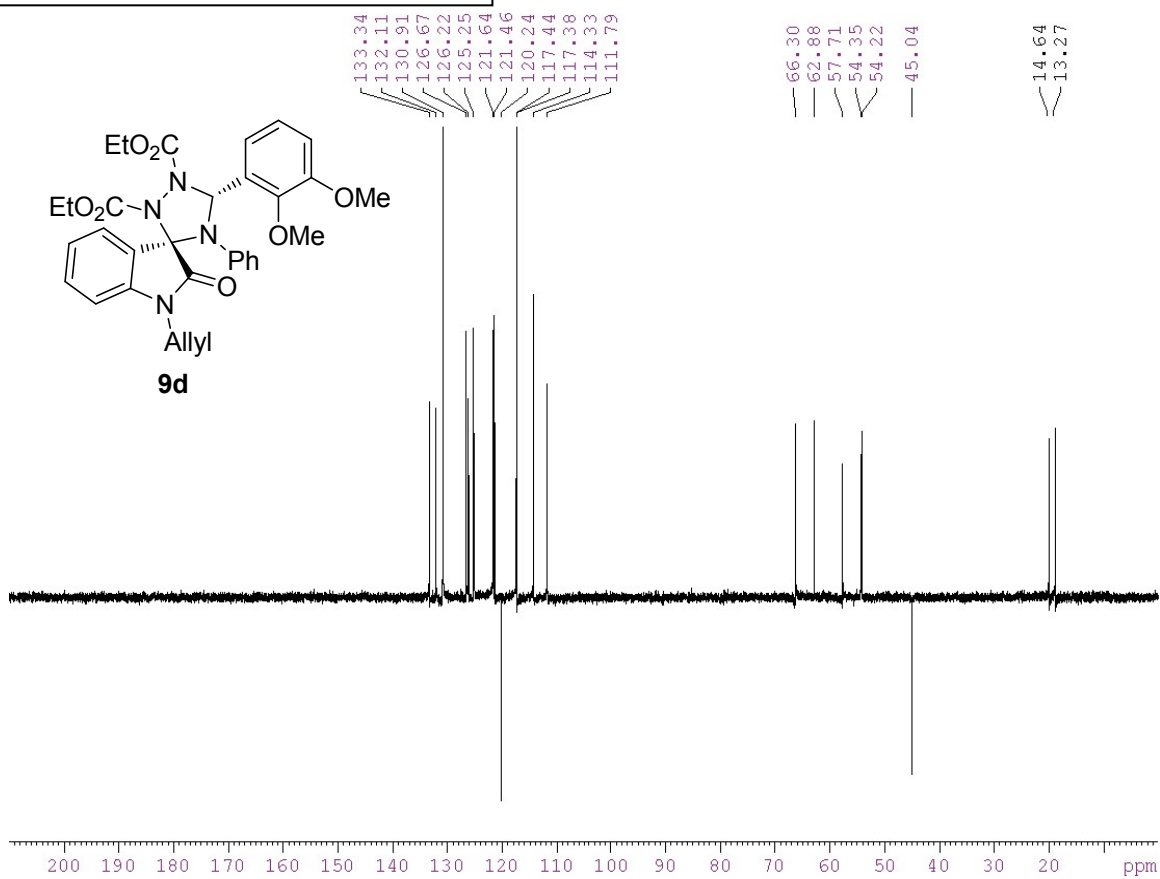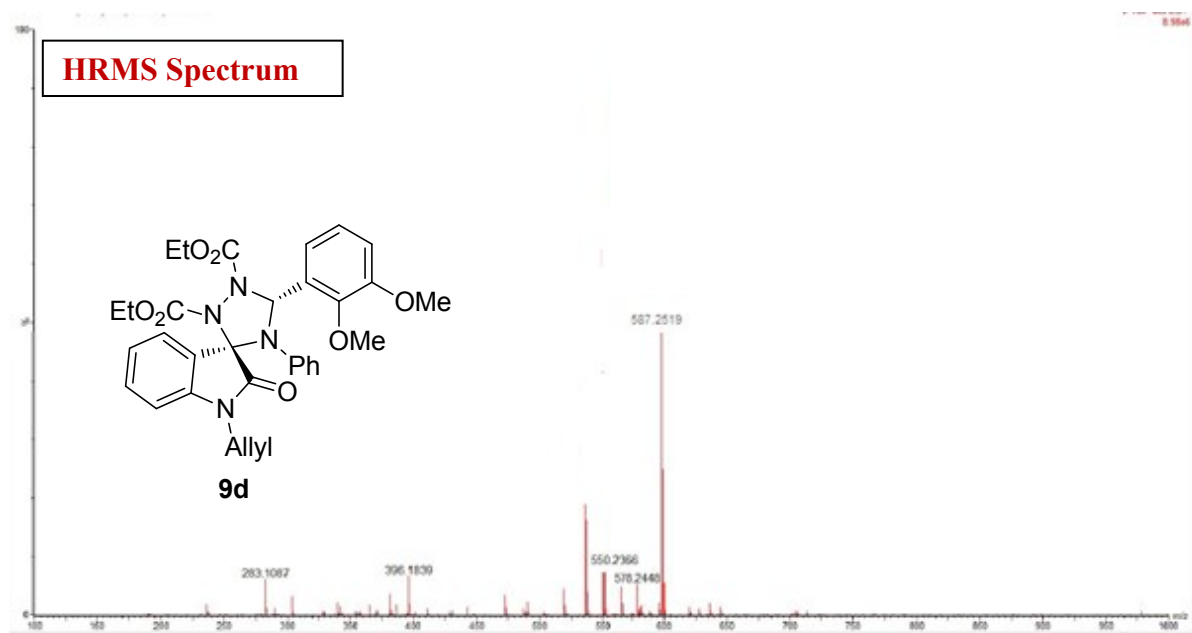

**<sup>1</sup>H NMR (100 MHz, CDCl<sub>3</sub>)**

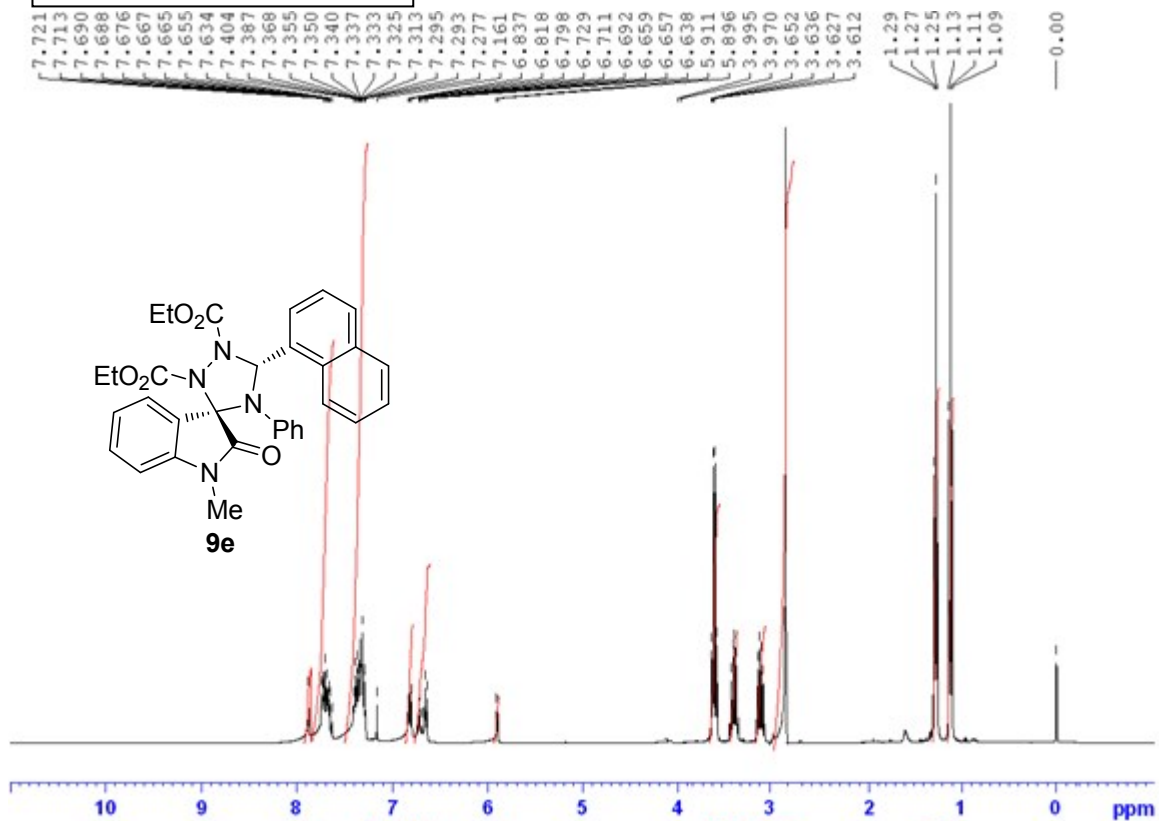

**<sup>13</sup>C NMR (100 MHz, CDCl<sub>3</sub>)**

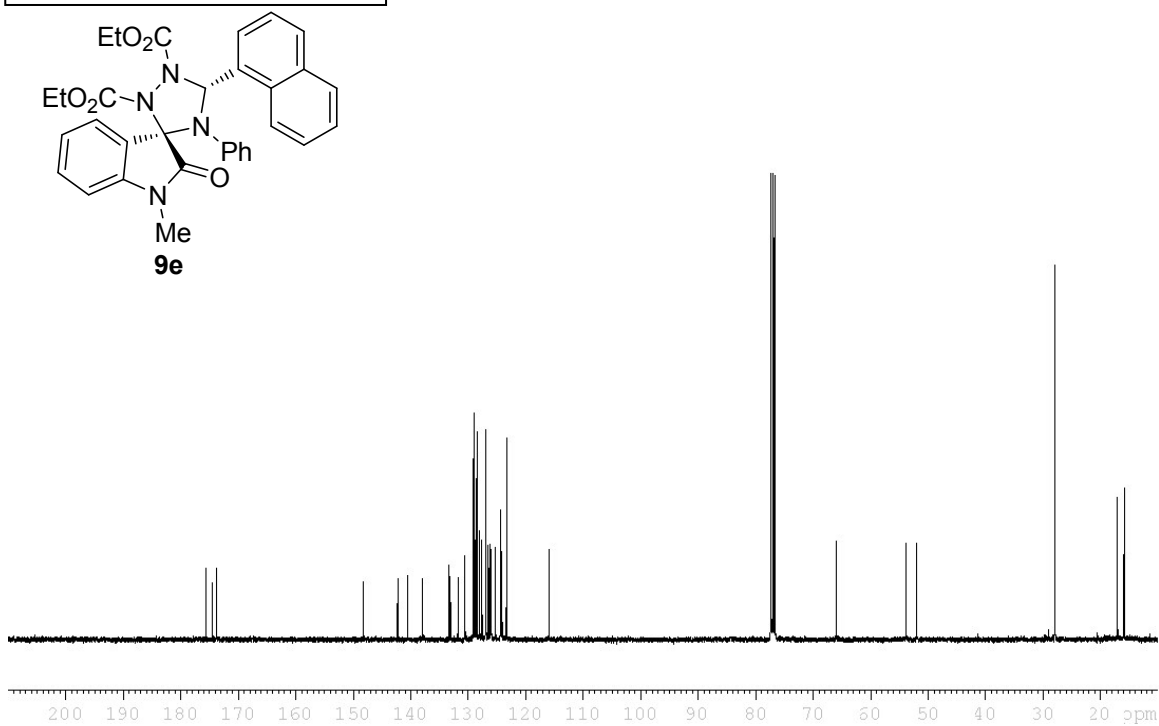

### <sup>13</sup>C DEPT135 NMR (100 MHz, CDCl<sub>3</sub>)

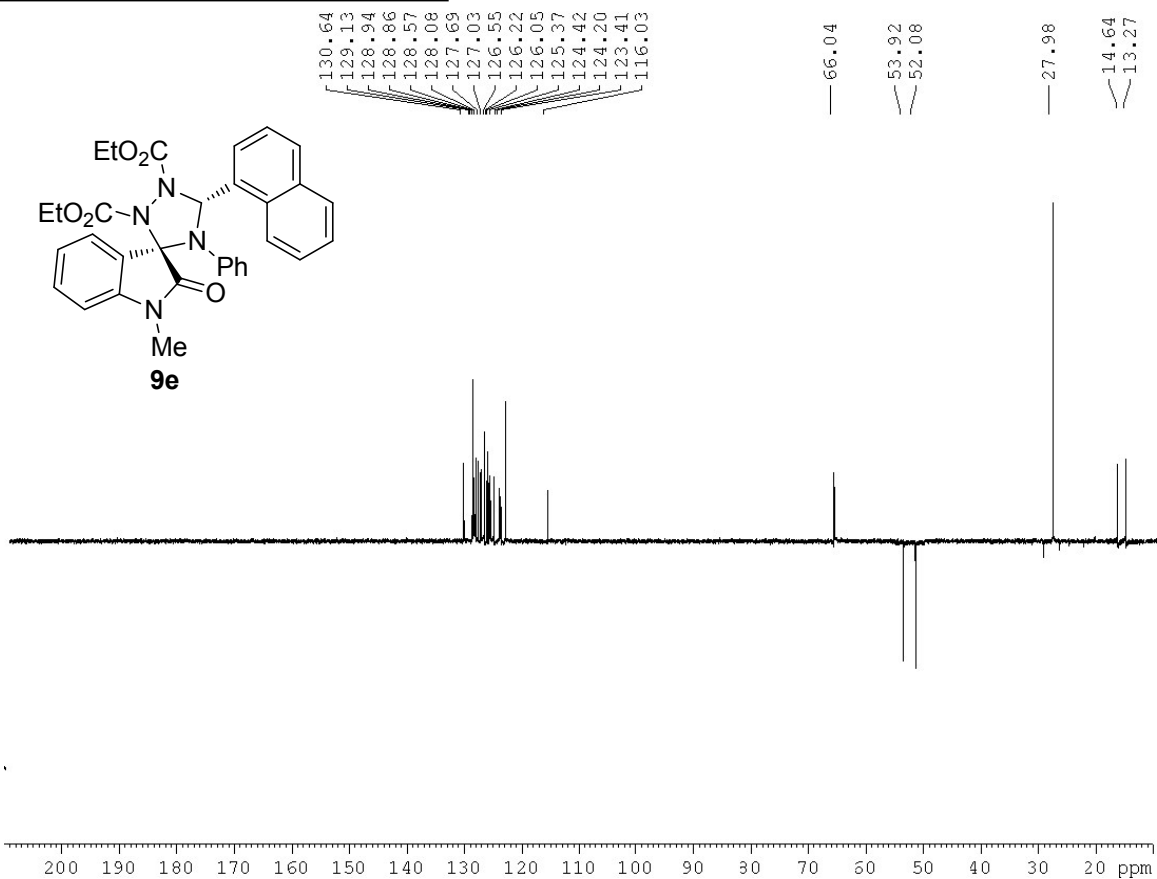

### HRMS Spectrum

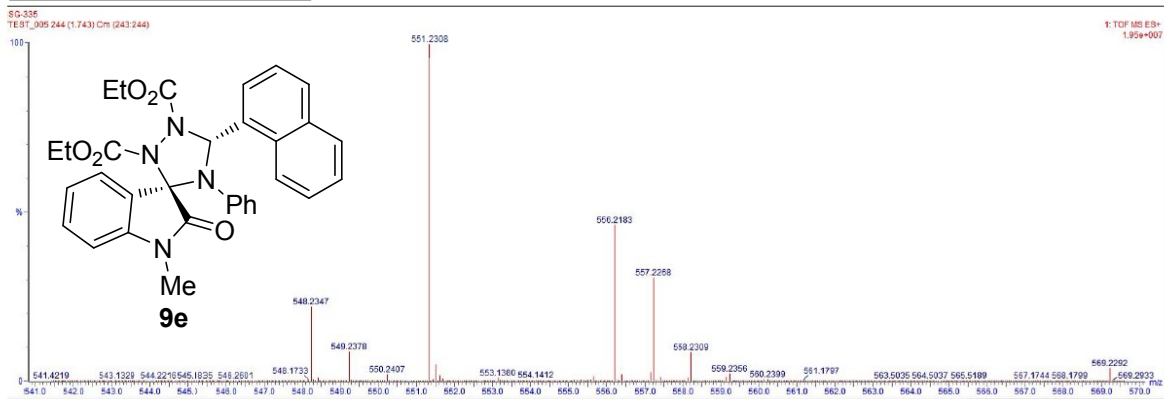

**<sup>1</sup>H NMR (400 MHz, CDCl<sub>3</sub>)**

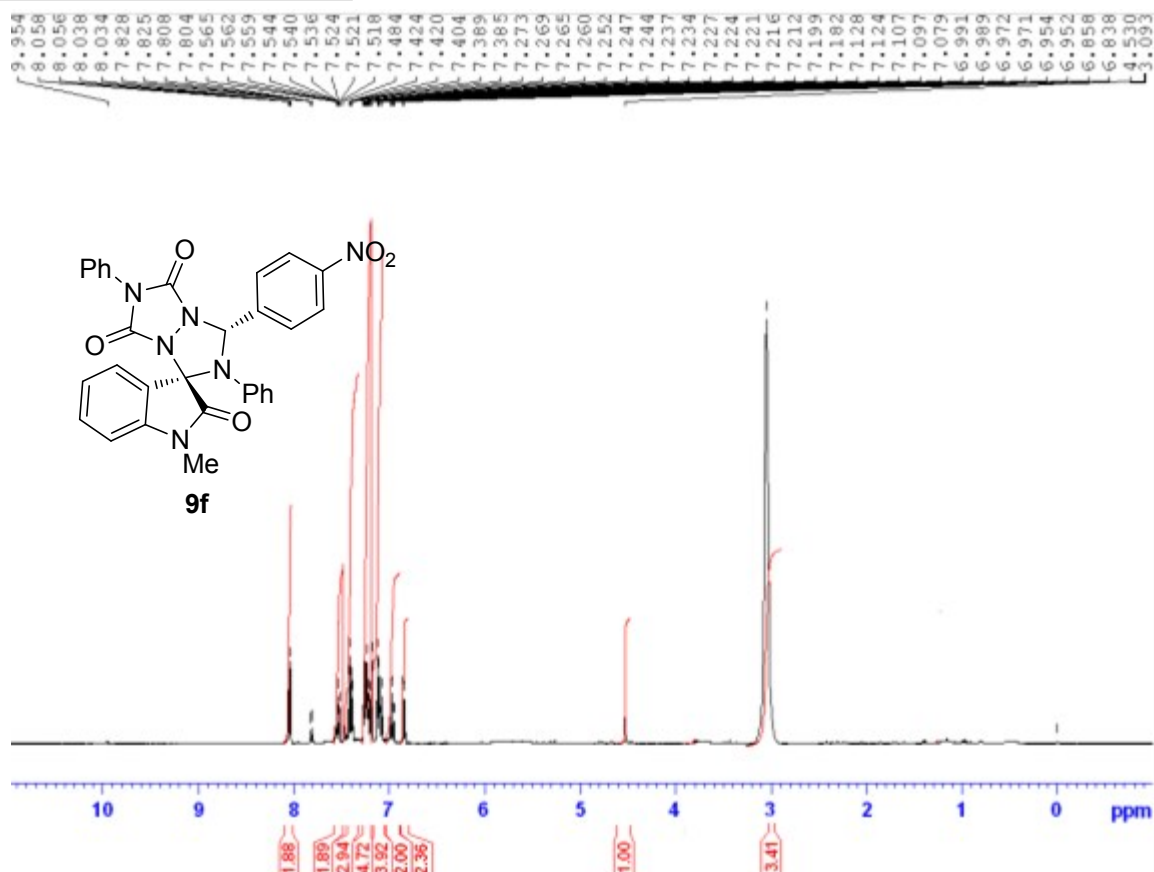

**<sup>13</sup>C NMR (100 MHz, CDCl<sub>3</sub>)**

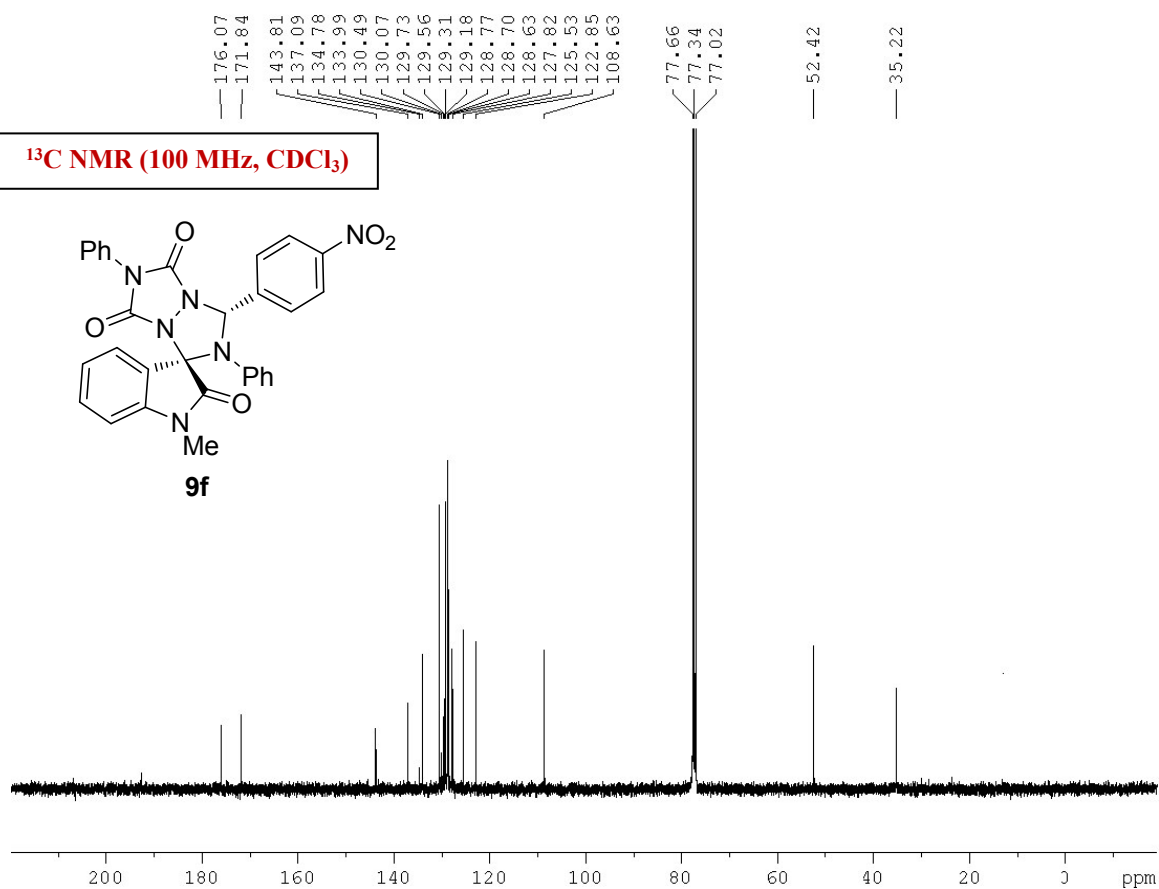



133.99  
130.48  
129.18  
128.77  
128.71  
128.63  
127.82  
125.53  
122.85  
108.64

— 52.42

— 35.22

**<sup>13</sup>C DEPT135 NMR (100 MHz, CDCl<sub>3</sub>)**

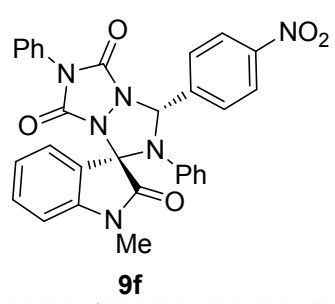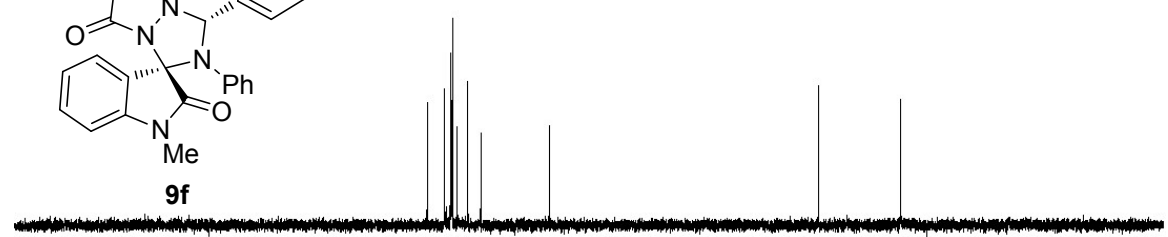

200 180 160 140 120 100 80 60 40 20 0 ppm

**HRMS Spectrum**

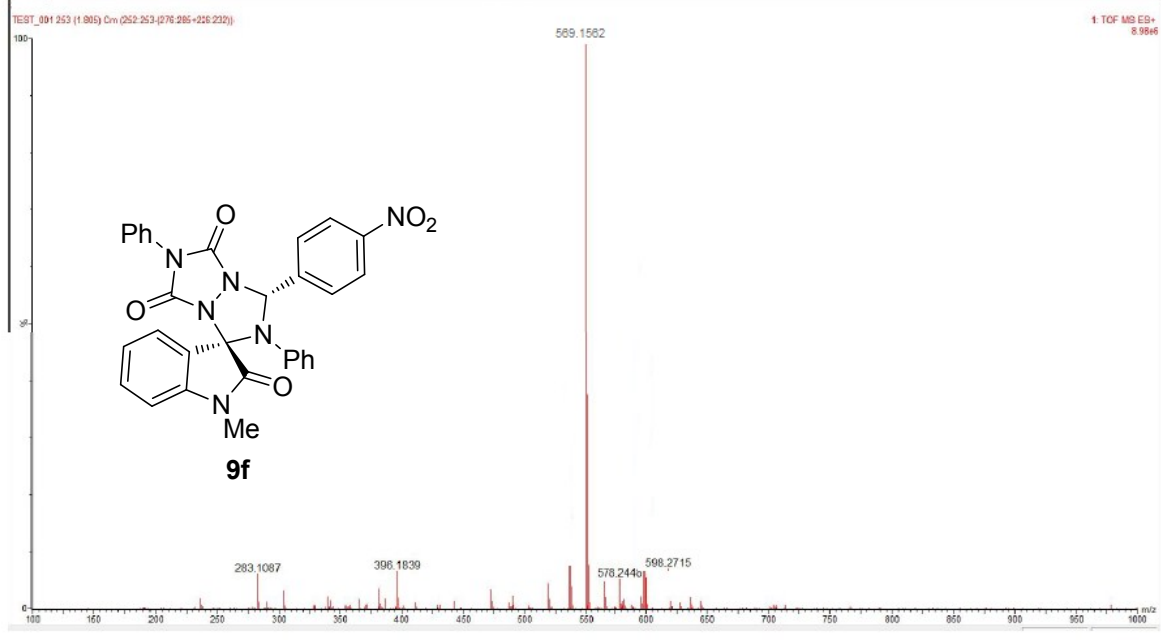

9.954  
8.058  
8.056  
8.038  
8.034  
7.959  
7.944  
7.940  
7.936  
7.924  
7.921  
7.918  
8.24  
7.920  
7.904  
7.989  
7.985  
7.973  
7.969  
7.965  
7.960  
7.952  
7.947  
7.944  
7.937  
7.934  
7.927  
7.924  
7.921  
7.916  
7.912  
7.199  
7.182  
7.128  
7.124  
7.107  
7.097  
7.079  
6.991  
6.989  
6.972  
6.971  
6.954  
6.952  
6.858  
6.838  
4.530  
3.765  
3.747  
3.729  
3.711  
1.245  
1.227  
1.209

**<sup>1</sup>H NMR (400 MHz, CDCl<sub>3</sub>)**

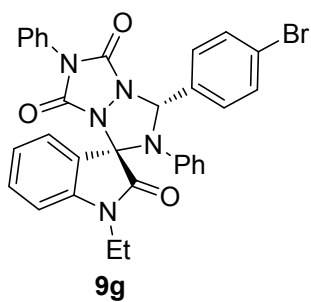

15 14 13 12 11 10 9 8 7 6 5 4 3 2 1 0 -1 ppm

**<sup>13</sup>C NMR (100 MHz, CDCl<sub>3</sub>)**

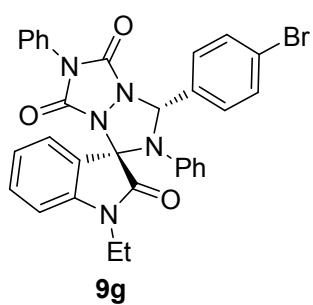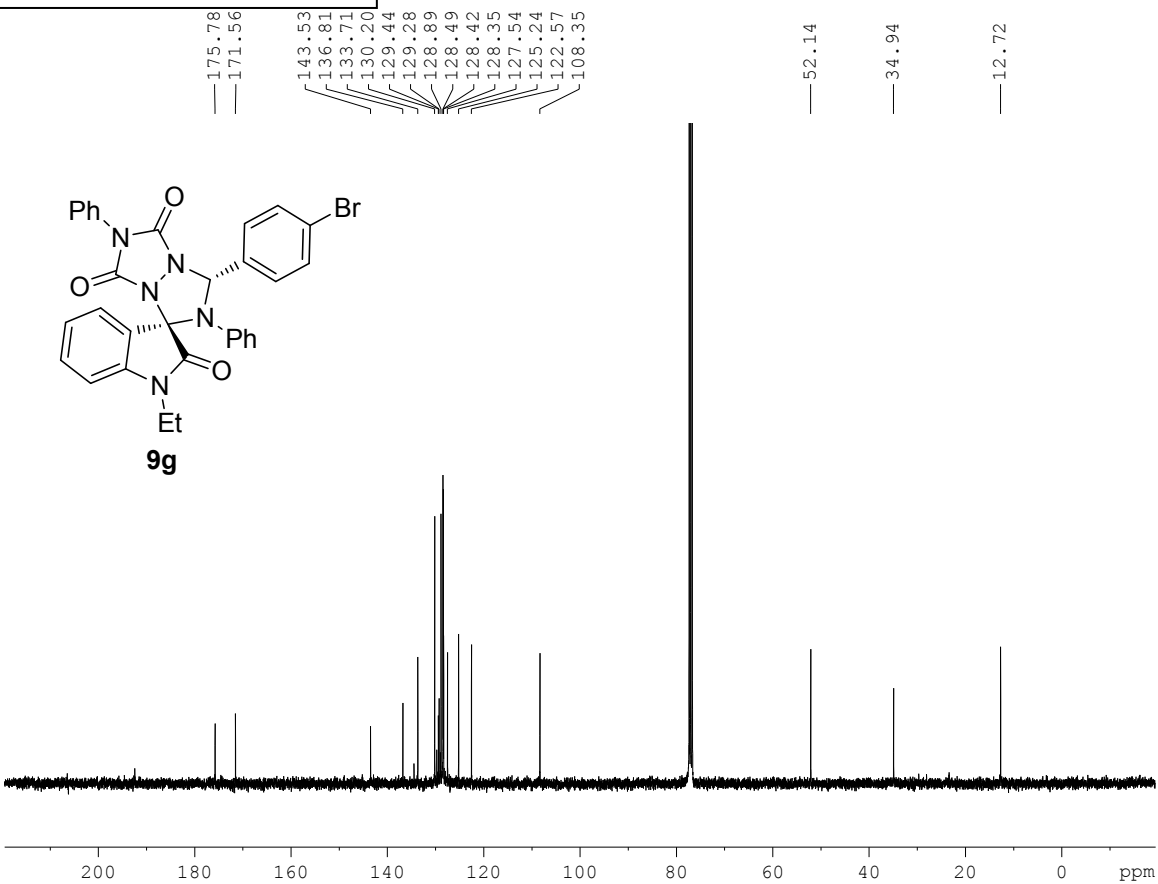

**<sup>13</sup>C DEPT135 NMR (100 MHz, CDCl<sub>3</sub>)**

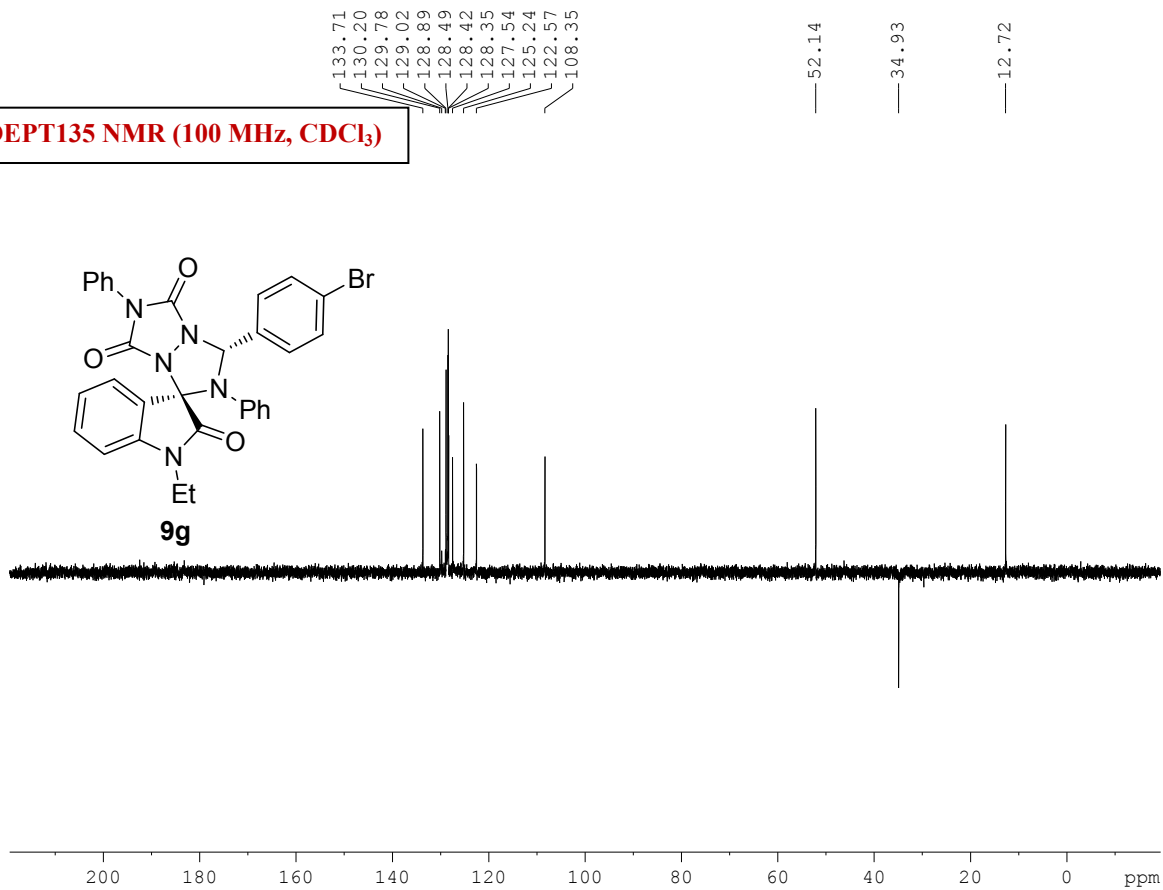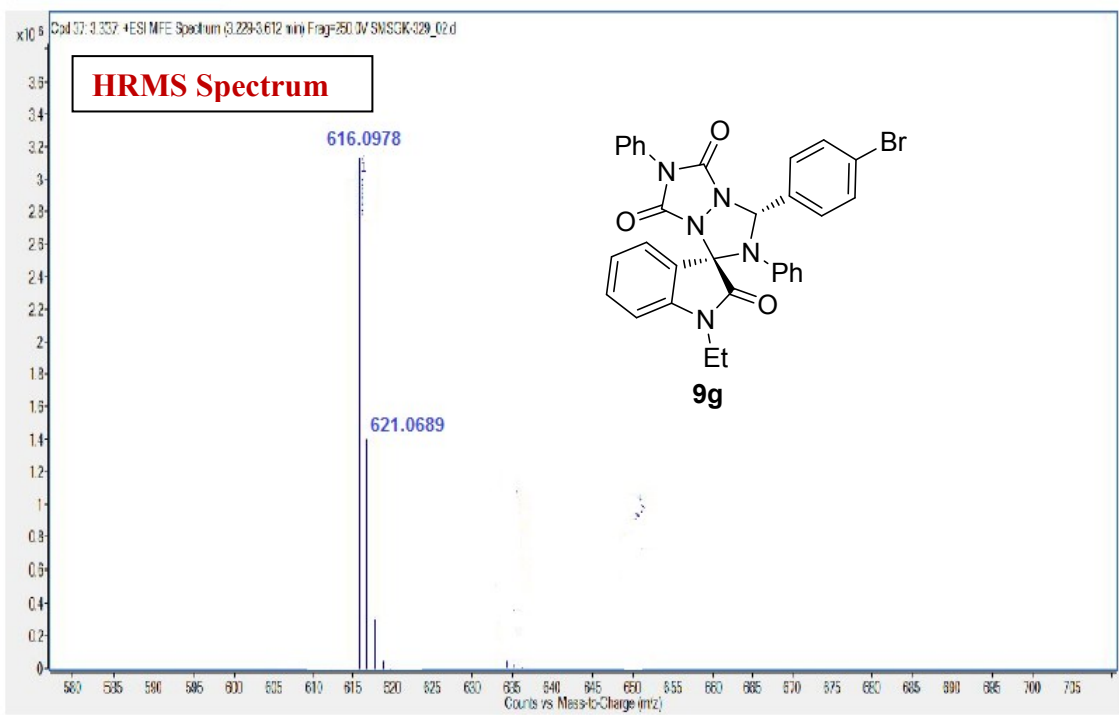

**<sup>1</sup>H NMR (400 MHz, CDCl<sub>3</sub>)**

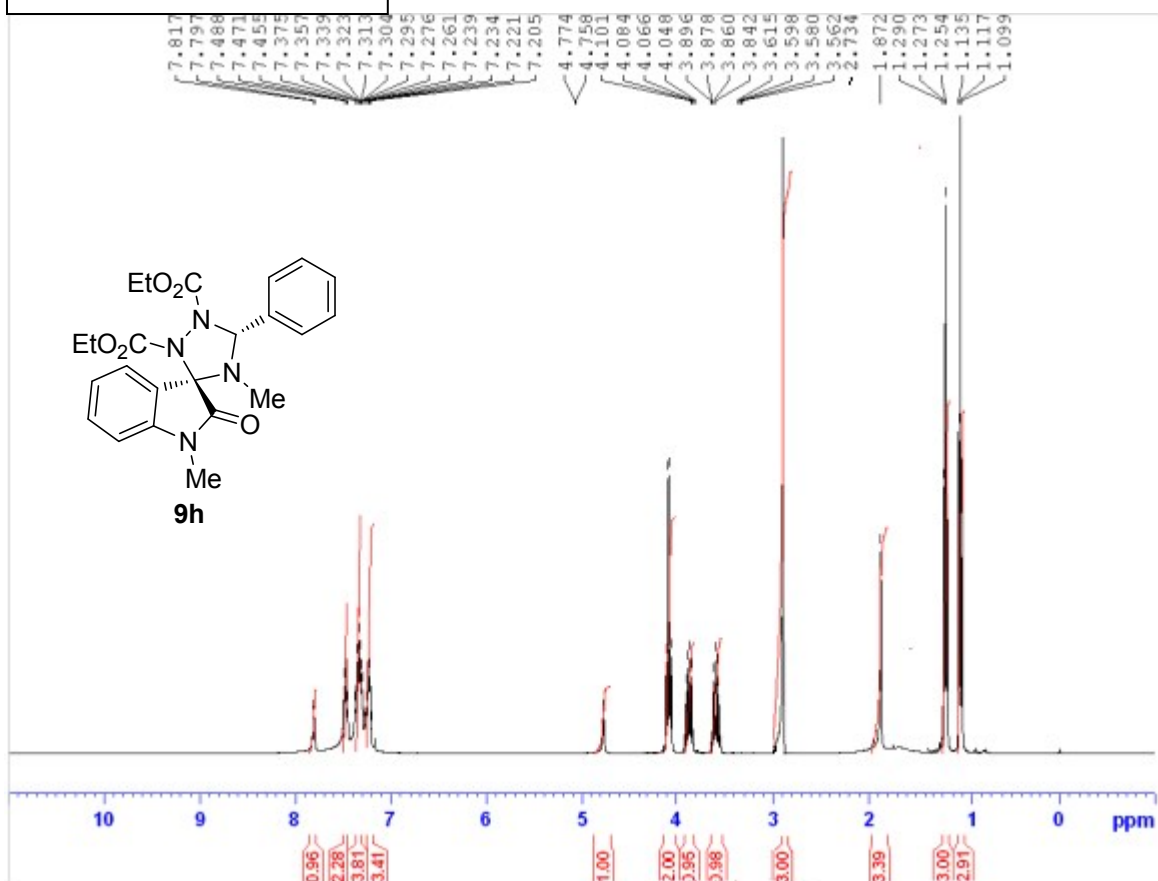

**<sup>13</sup>C NMR (100 MHz, CDCl<sub>3</sub>)**

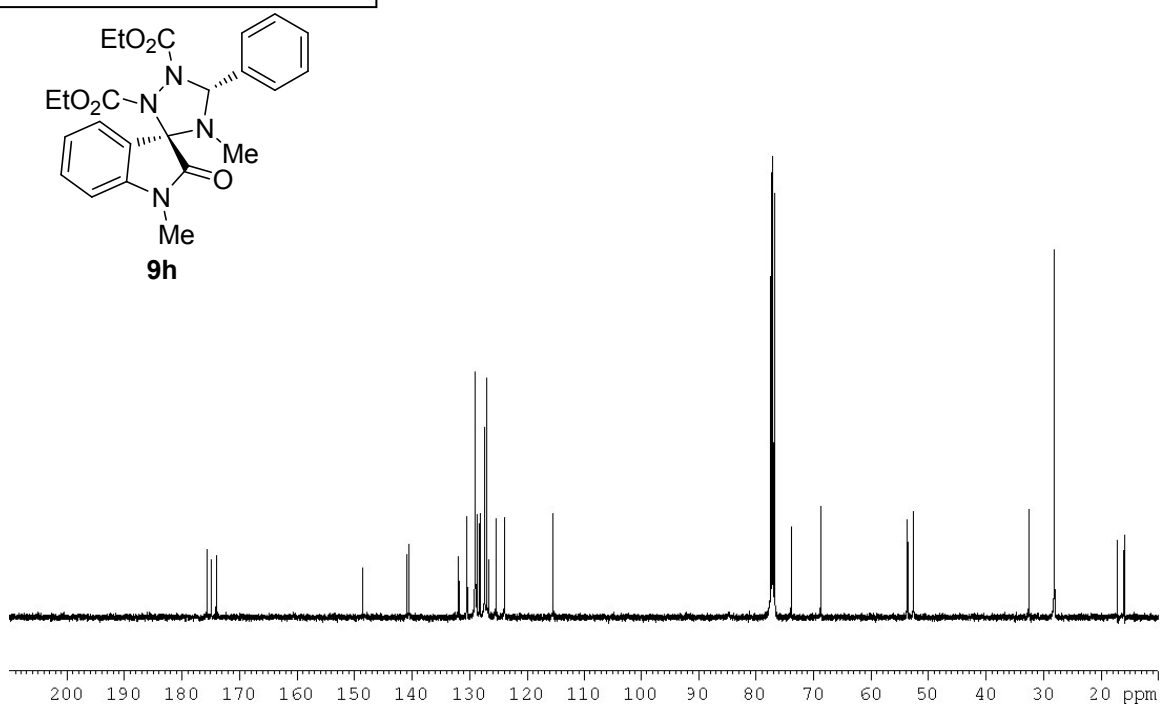

**<sup>13</sup>C DEPT135 NMR (100 MHz, CDCl<sub>3</sub>)**

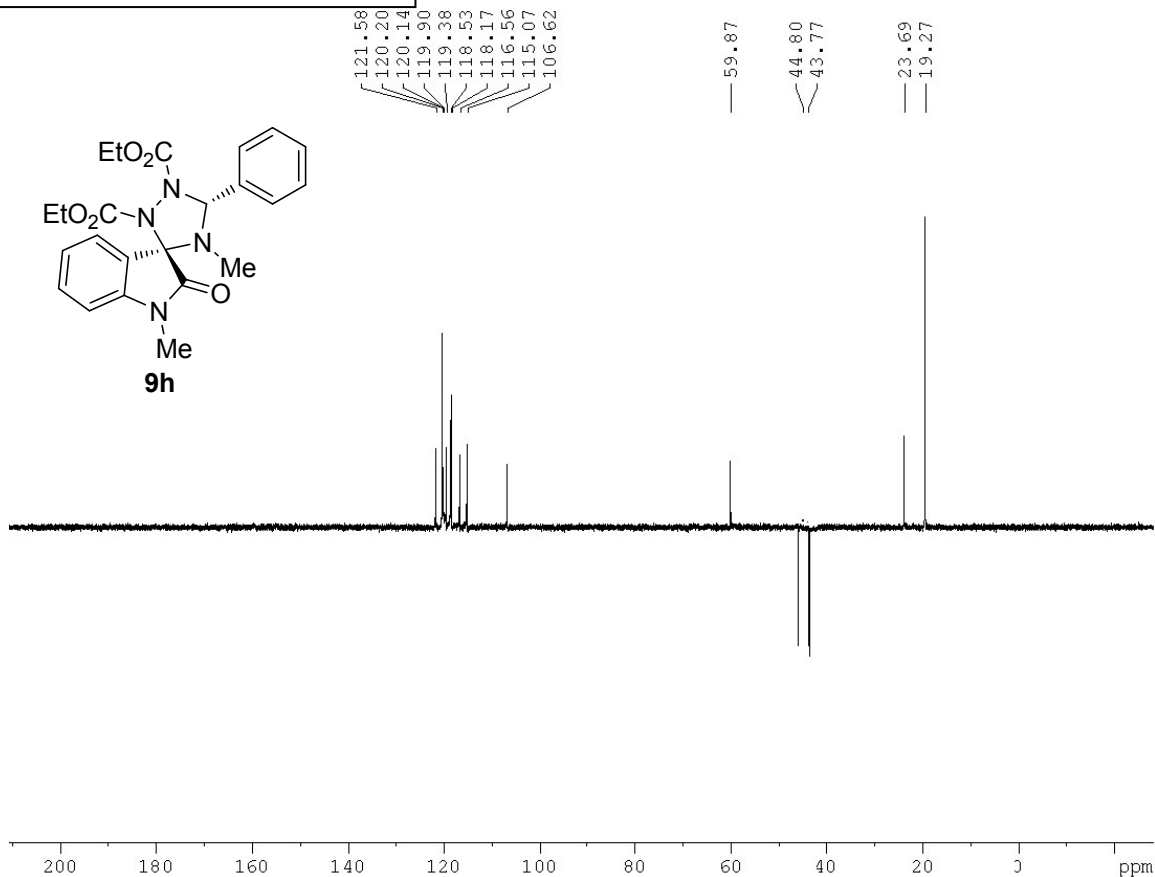

C:\Xcalibur...1-10 MAY 2014\SMGK-307

02-05-2014 13:05:11

SMGK-307 #73 RT: 1.09 AV: 1 SB: 233 0.09-0.71, 2.15-5.02 NL: 3.05E5  
T: FTMS {1,1} + p ESI Full lock ms [100.00-2000.00]

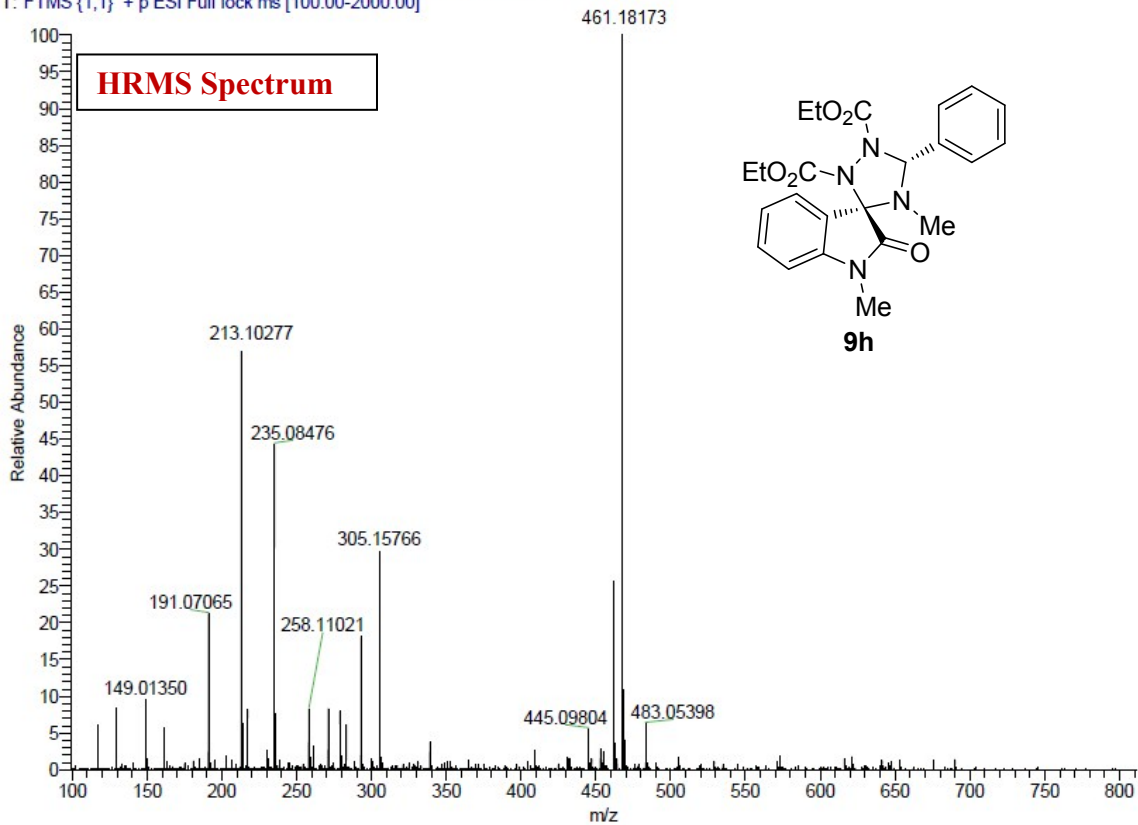

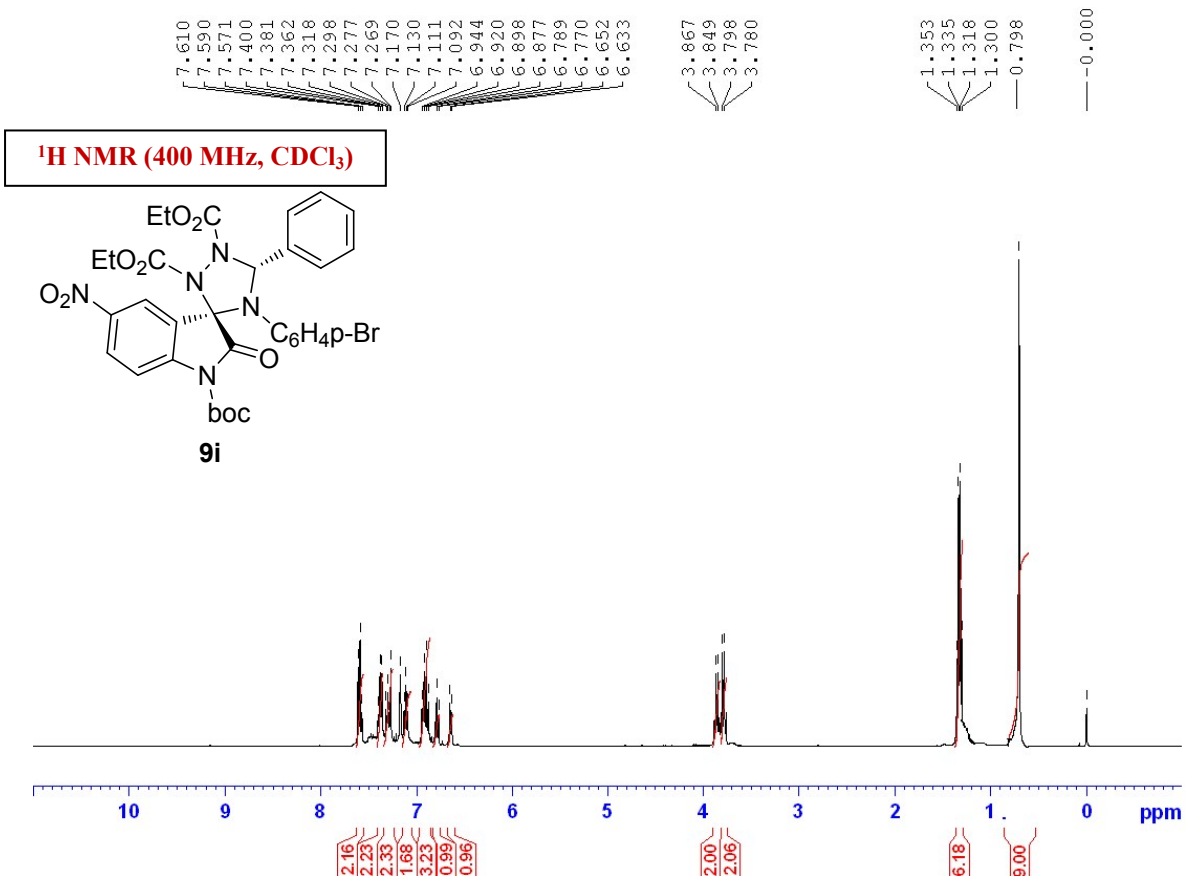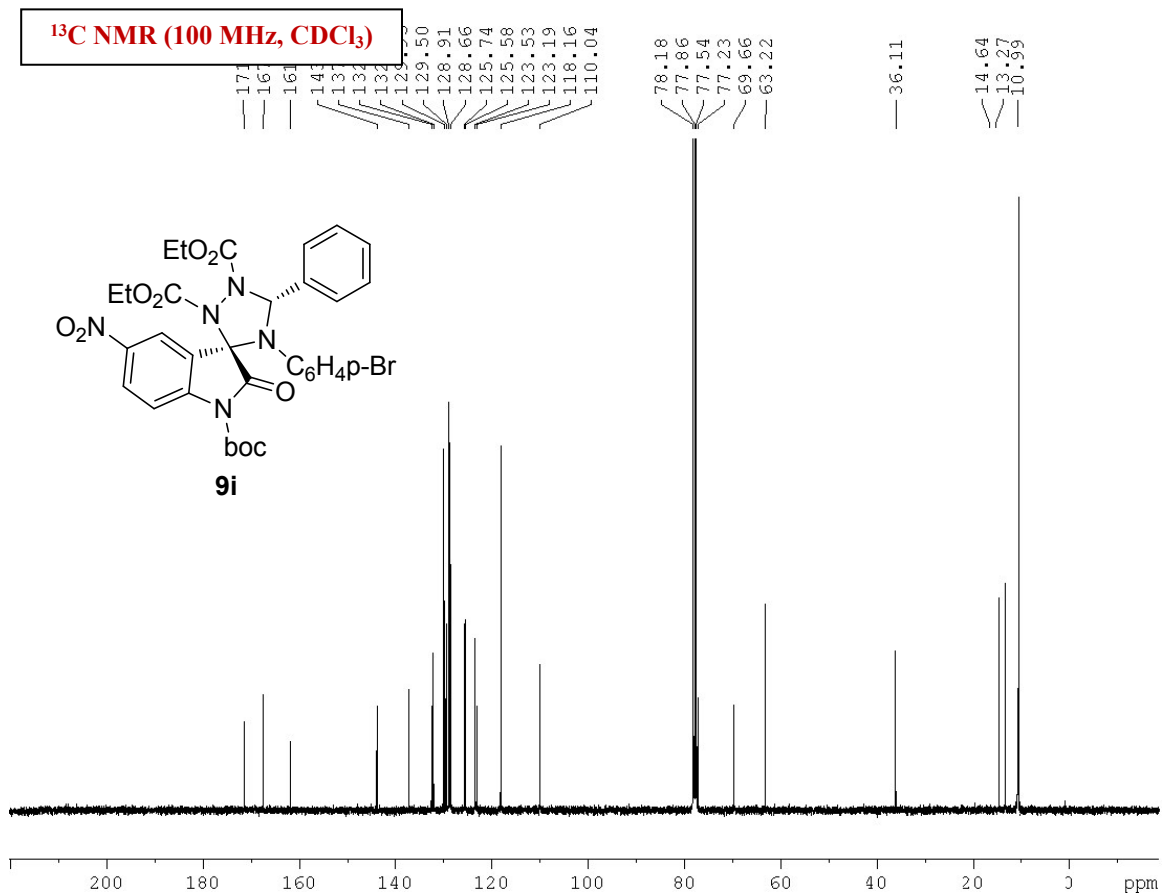

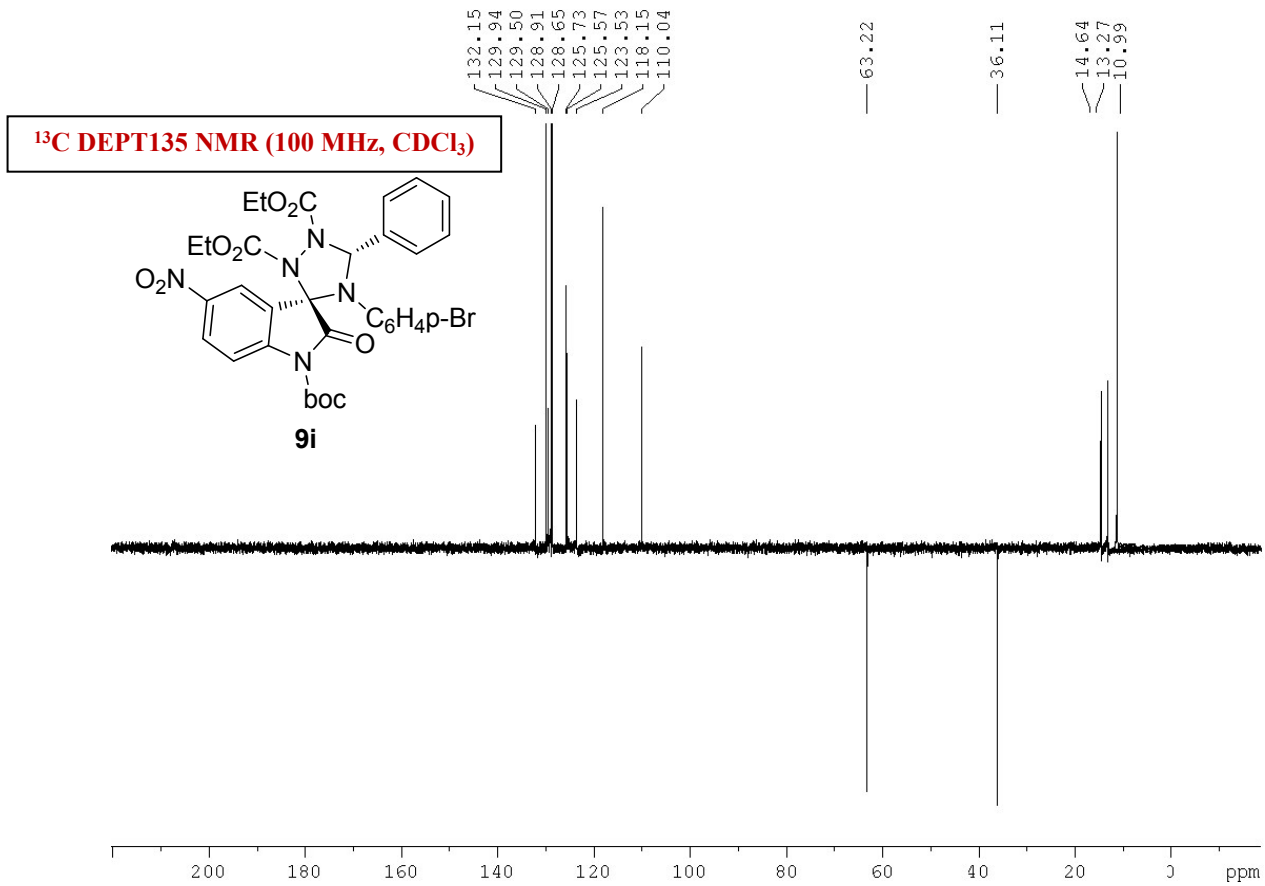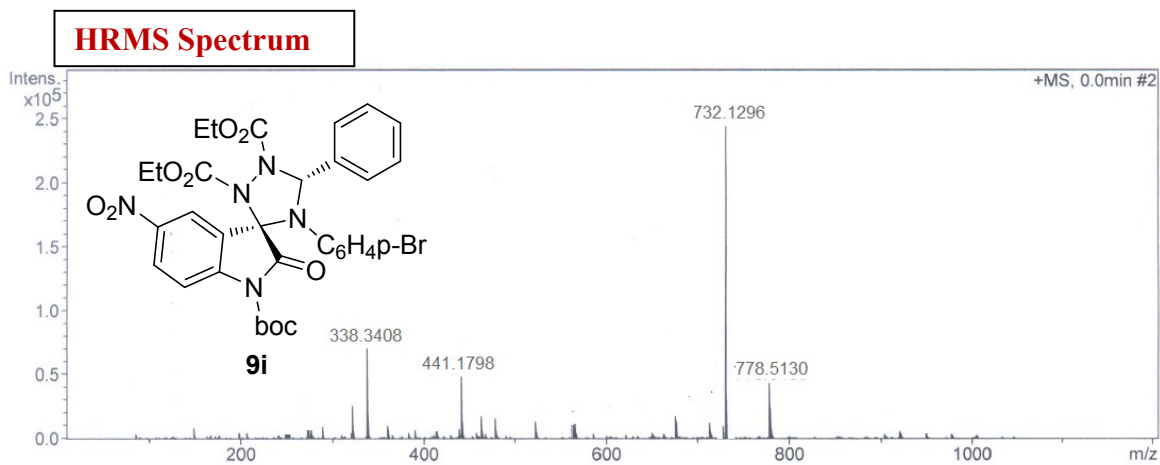

**<sup>1</sup>H NMR (400 MHz, CDCl<sub>3</sub>)**

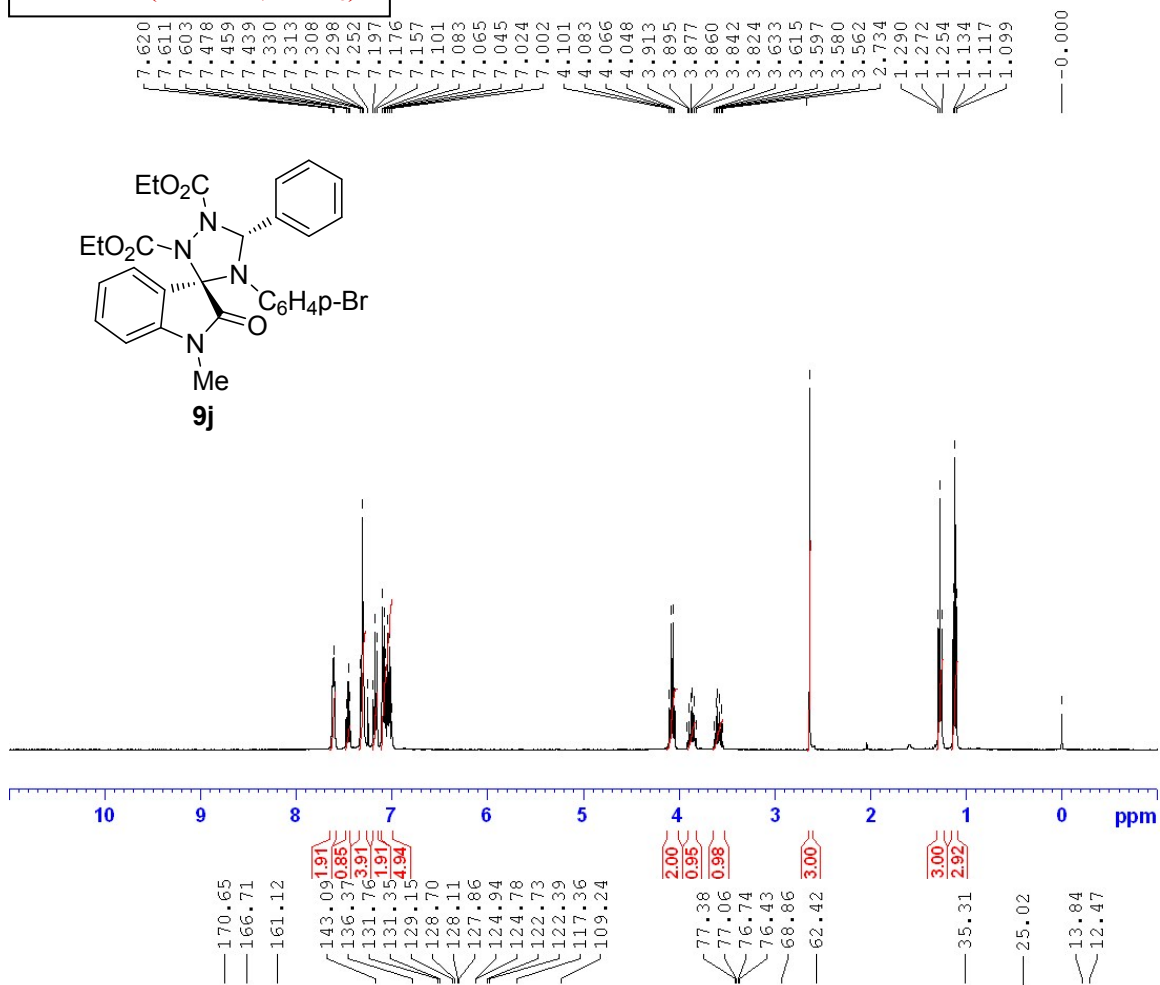

**<sup>13</sup>C NMR (100 MHz, CDCl<sub>3</sub>)**

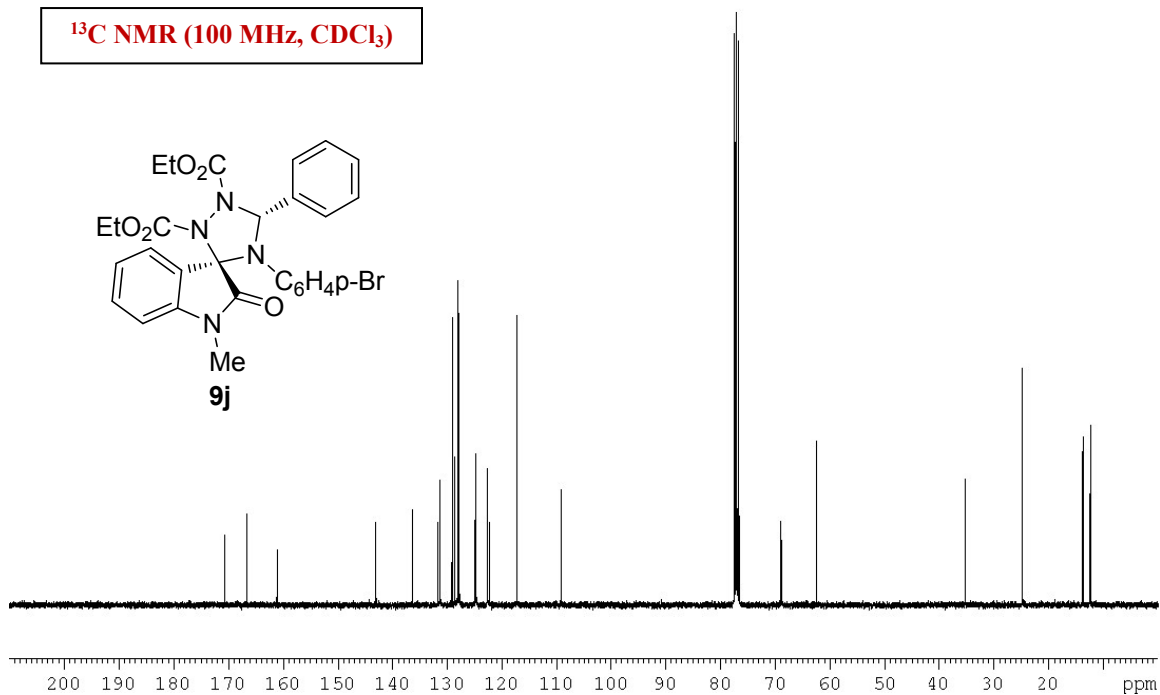



### <sup>13</sup>C DEPT135 NMR (100 MHz, CDCl<sub>3</sub>)

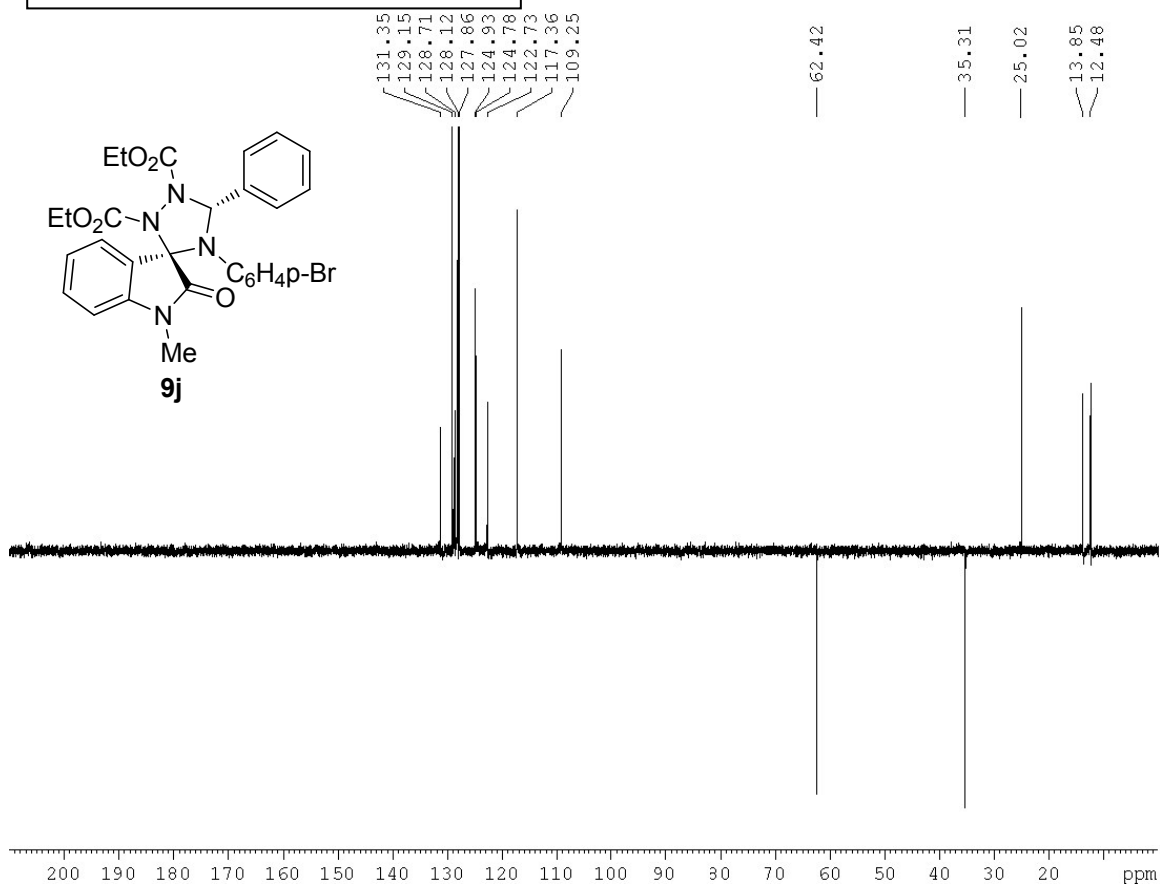

### HRMS Spectrum

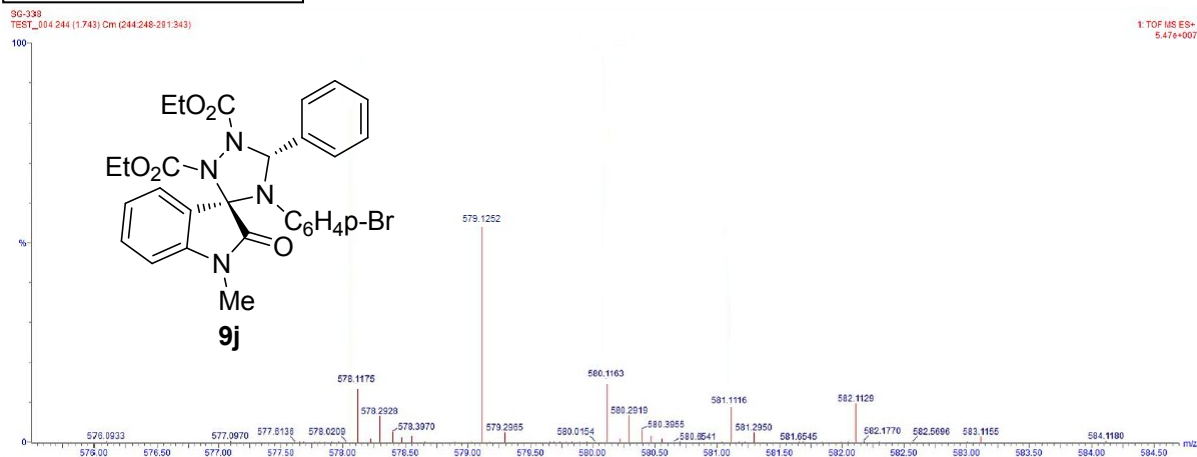

## HPLC data for compound 5k

### Area % Report

Data File: D:\Ezchrom\hplc data\sgk307-100acn2014\_04\_msk\_100acn.met.rslt\186.dat

Acquired: 4/9/2014 12:21:53 PM (GMT +05:30)

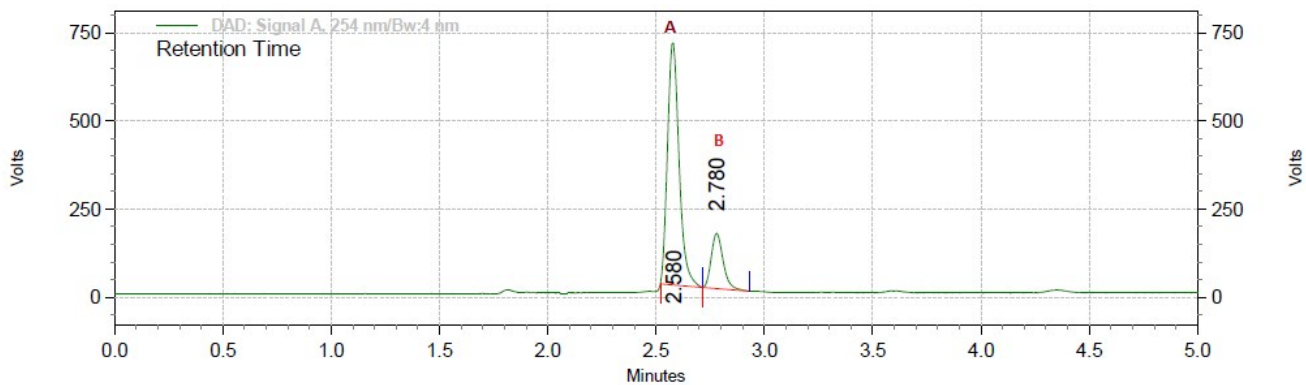

### DAD: Signal

A, 254 nm/Bw: 4 nm

### Results

| Retention Time | Area    | Area % | Height  | Height % | Name |
|----------------|---------|--------|---------|----------|------|
| 2.580          | 5367566 | 81.11  | 1439529 | 81.36    | A    |
| 2.780          | 1250371 | 18.89  | 329901  | 18.64    | B    |
| <b>Totals</b>  | 6617937 | 100.00 | 1769430 | 100.00   |      |
